# Supplementary material for: Quantitative proteomic analysis reveals mitochondrial protein changes in MPP+-induced neuronal cells
Source: Royal Society of Chemistry journal article supplement (doi:10.1039/c4mb00026a), 2014-04-24
Supplement: c4mb00026a1.pdf [file c4mb00026a1.pdf]

Supporting Information Table 1. List of 1740 proteins identified from the three independent replicates.

| Accession No. | Uniprot ID   | Protein description                                                                                    | Protein Probability | Log2 Ratio (Treat/Control) |
|---------------|--------------|--------------------------------------------------------------------------------------------------------|---------------------|----------------------------|
| Q709C8-2      | VP13C_HUMAN  | Isoform 2 of Vacuolar protein sorting-associated protein 13C OS=Homo sapiens GN=VPS13C                 | 1                   | 9.964340868                |
| Q8TEP8        | CE192_HUMAN  | Centrosomal protein of 192 kDa OS=Homo sapiens GN=CEP192 PE=1 SV=2                                     | 0.9957              | 9.964340868                |
| A8MPV3        | YR010_HUMAN  | Putative uncharacterized protein ENSP0000344348 OS=Homo sapiens PE=2 SV=2                              | 0.9786              | 9.964340868                |
| Q5VX85        | Q5VX85_HUMAN | Poly (ADP-ribose) polymerase 1 OS=Homo sapiens GN=PARP1 PE=2 SV=1                                      | 0.9715              | 9.964340868                |
| A2A3K4-2      | PTPC1_HUMAN  | Isoform 2 of Protein tyrosine phosphatase domain-containing protein 1 OS=Homo sapiens GN=PTPDC1        | 0.9374              | 9.964340868                |
| Q9Y4R8        | TELO2_HUMAN  | Telomere length regulation protein TEL2 homolog OS=Homo sapiens GN=TELO2 PE=1 SV=2                     | 0.9322              | 9.964340868                |
| O75962-2      | TRIO_HUMAN   | Isoform 2 of Triple functional domain protein OS=Homo sapiens GN=TRIO                                  | 0.9775              | 6.759289016                |
| Q10571        | MN1_HUMAN    | Probable tumor suppressor protein MN1 OS=Homo sapiens GN=MN1 PE=1 SV=3                                 | 0.9953              | 6.431121473                |
| Q63ZY3-2      | KANK2_HUMAN  | Isoform 2 of KN motif and ankyrin repeat domain-containing protein 2 OS=Homo sapiens GN=KANK2          | 0.8881              | 6.036503334                |
| Q86X12-2      | CNDG2_HUMAN  | Isoform 2 of Condensin-2 complex subunit G2 OS=Homo sapiens GN=NCAPG2                                  | 0.9971              | 5.462379572                |
| Q99490        | AGAP2_HUMAN  | Arf-GAP with GTPase                                                                                    | 0.9935              | 5.136683578                |
| O60282        | KIF5C_HUMAN  | Kinesin heavy chain isoform 5C OS=Homo sapiens GN=KIF5C PE=1 SV=1                                      | 0.8201              | 5.09212285                 |
| Q86VM9        | ZCH18_HUMAN  | Zinc finger CCCH domain-containing protein 18 OS=Homo sapiens GN=ZC3H18 PE=1 SV=2                      | 0.9994              | 5.001351893                |
| Q9Y6Q5-2      | AP1M2_HUMAN  | Isoform 2 of AP-1 complex subunit mu-2 OS=Homo sapiens GN=AP1M2                                        | 0.9996              | 4.987775616                |
| F8WDE9        | F8WDE9_HUMAN | Inosine-5'-monophosphate dehydrogenase 1 OS=Homo sapiens GN=IMPDH1 PE=4 SV=1                           | 0.9583              | 4.961623328                |
| Q96HA7-2      | TONSL_HUMAN  | Isoform 2 of Tonsoku-like protein OS=Homo sapiens GN=TONSL                                             | 0.9979              | 4.886062338                |
| Q52LD8        | RFTN2_HUMAN  | Raftlin-2 OS=Homo sapiens GN=RFTN2 PE=1 SV=3                                                           | 0.9998              | 4.827819025                |
| Q8N2S1-2      | LTBP4_HUMAN  | Isoform 2 of Latent-transforming growth factor beta-binding protein 4 OS=Homo sapiens GN=LTBP4         | 0.9967              | 4.640389956                |
| F5H450        | F5H450_HUMAN | Frizzled-10 OS=Homo sapiens GN=FZD10 PE=4 SV=1                                                         | 0.9794              | 4.583759754                |
| Q9H4Z2-2      | ZN335_HUMAN  | Isoform 2 of Zinc finger protein 335 OS=Homo sapiens GN=ZNF335                                         | 0.8543              | 4.337711092                |
| Q9H8E8-2      | CSR2B_HUMAN  | Isoform 2 of Cysteine-rich protein 2-binding protein OS=Homo sapiens GN=CSR2BP                         | 0.945               | 4.279471296                |
| Q14571        | ITPR2_HUMAN  | Inositol 1                                                                                             | 1                   | 4.266786541                |
| A8K8P3-10     | SF11_HUMAN   | Isoform 10 of Protein SF11 homolog OS=Homo sapiens GN=SF11                                             | 0.9628              | 4.240314329                |
| Q86YV0-2      | RASL3_HUMAN  | Isoform 2 of RAS protein activator like-3 OS=Homo sapiens GN=RASAL3                                    | 0.9876              | 4.213347282                |
| Q9BX26        | SYCP2_HUMAN  | Synaptonemal complex protein 2 OS=Homo sapiens GN=SYCP2 PE=2 SV=2                                      | 0.9997              | 3.412781525                |
| Q9P2E9-2      | RRBP1_HUMAN  | Isoform 1 of Ribosome-binding protein 1 OS=Homo sapiens GN=RRBP1                                       | 0.9999              | 3.289834465                |
| Q96HP0        | DOCK6_HUMAN  | Dedicator of cytokinesis protein 6 OS=Homo sapiens GN=DOCK6 PE=1 SV=3                                  | 0.9055              | 3.173127433                |
| Q9UF83        | YM012_HUMAN  | Uncharacterized protein DKFZp434B061 OS=Homo sapiens PE=2 SV=2                                         | 0.9996              | 3.163498732                |
| Q6RI45        | BRWD3_HUMAN  | Bromodomain and WD repeat-containing protein 3 OS=Homo sapiens GN=BRWD3 PE=1 SV=2                      | 0.998               | 3.148934105                |
| O95714        | HERC2_HUMAN  | E3 ubiquitin-protein ligase HERC2 OS=Homo sapiens GN=HERC2 PE=1 SV=2                                   | 1                   | 3.147306699                |
| Q5T5J6        | SWT1_HUMAN   | Transcriptional protein SWT1 OS=Homo sapiens GN=SWT1 PE=2 SV=1                                         | 0.9789              | 3.061776198                |
| Q8NCT3-6      | K0895_HUMAN  | Isoform 6 of Uncharacterized protein KIAA0895 OS=Homo sapiens GN=KIAA0895                              | 0.8001              | 3.058316496                |
| Q9NY37        | ASIC5_HUMAN  | Acid-sensing ion channel 5 OS=Homo sapiens GN=ASIC5 PE=1 SV=1                                          | 0.9137              | 3.016139703                |
| Q14432        | PDE3A_HUMAN  | cGMP-inhibited 3'                                                                                      | 0.9993              | 2.98550043                 |
| Q02880-2      | TOP2B_HUMAN  | Isoform Beta-1 of DNA topoisomerase 2-beta OS=Homo sapiens GN=TOP2B                                    | 0.9363              | 2.853995647                |
| O00418        | EEF2K_HUMAN  | Eukaryotic elongation factor 2 kinase OS=Homo sapiens GN=EEF2K PE=1 SV=2                               | 0.9562              | 2.825785627                |
| B7Z1V0        | B7Z1V0_HUMAN | Beta-chimaerin OS=Homo sapiens GN=CHN2 PE=2 SV=1                                                       | 0.9992              | 2.782408565                |
| Q92620        | PRP16_HUMAN  | Pre-mRNA-splicing factor ATP-dependent RNA helicase PRP16 OS=Homo sapiens GN=DHX38 PE=1 SV=            | 0.9996              | 2.769771739                |
| F5H5Q9        | F5H5Q9_HUMAN | Armadillo repeat-containing protein 4 OS=Homo sapiens GN=ARMC4 PE=4 SV=1                               | 0.9512              | 2.711494907                |
| Q9H254        | SPTN4_HUMAN  | Spectrin beta chain                                                                                    | 1                   | 2.596935142                |
| Q385D2-2      | LRRK1_HUMAN  | Isoform 2 of Leucine-rich repeat serine/threonine-protein kinase 1 OS=Homo sapiens GN=LRRK1            | 0.9618              | 2.570462931                |
| H3BQI5        | H3BQI5_HUMAN | Protein FAM65A (Fragment) OS=Homo sapiens GN=FAM65A PE=4 SV=1                                          | 0.9363              | 2.44625623                 |
| Q9UH60        | DCDC2_HUMAN  | Doublecortin domain-containing protein 2 OS=Homo sapiens GN=DCDC2 PE=1 SV=2                            | 0.9256              | 2.381283373                |
| Q9NZC9        | SMAL1_HUMAN  | SWI/SNF-related matrix-associated actin-dependent regulator of chromatin subfamily A-like protein 1 OS | 0.9342              | 2.292781749                |
| Q7Z6Z7-2      | HUWE1_HUMAN  | Isoform 2 of E3 ubiquitin-protein ligase HUWE1 OS=Homo sapiens GN=HUWE1                                | 1                   | 2.253989266                |
| Q86X10-2      | RLGPB_HUMAN  | Isoform 2 of Ral GTPase-activating protein subunit beta OS=Homo sapiens GN=RALGAPB                     | 0.9503              | 2.195347598                |
| A7M8M2        | DISP2_HUMAN  | Protein dispatched homolog 2 OS=Homo sapiens GN=DISP2 PE=2 SV=2                                        | 0.9127              | 2.17951105                 |
| P13928        | ANXA8_HUMAN  | Annexin A8 OS=Homo sapiens GN=ANXA8 PE=1 SV=3                                                          | 0.949               | 2.09085343                 |
| P84550        | SKOR1_HUMAN  | SKI family transcriptional corepressor 1 OS=Homo sapiens GN=SKOR1 PE=1 SV=1                            | 0.9375              | 2.084064265                |
| G3V2J8        | G3V2J8_HUMAN | Heat shock protein HSP 90-alpha (Fragment) OS=Homo sapiens GN=HSP90AA1 PE=4 SV=1                       | 0.9886              | 2.006576663                |
| Q9H967        | WDR76_HUMAN  | WD repeat-containing protein 76 OS=Homo sapiens GN=WDR76 PE=1 SV=2                                     | 0.973               | 2.070389328                |
| Q5TG53-2      | SEAS1_HUMAN  | Isoform 2 of Putative uncharacterized protein SERTAD4-AS1 OS=Homo sapiens GN=SERTAD4-AS1               | 0.9769              | 2.049630768                |
| Q3KQU3-2      | MA7D1_HUMAN  | Isoform 2 of MAP7 domain-containing protein 1 OS=Homo sapiens GN=MAP7D1                                | 0.9131              | 2.028569152                |
| I3L326        | I3L326_HUMAN | Hepatocyte growth factor-regulated tyrosine kinase substrate (Fragment) OS=Homo sapiens GN=HGS PE      | 0.9442              | 2.010779839                |
| O00764-2      | PDXK_HUMAN   | Isoform 2 of Pyridoxal kinase OS=Homo sapiens GN=PDXK                                                  | 0.9939              | 1.967168608                |
| P18583-3      | SON_HUMAN    | Isoform B of Protein SON OS=Homo sapiens GN=SON                                                        | 0.9402              | 1.959770155                |
| Q9ULT8        | HECTD1_HUMAN | E3 ubiquitin-protein ligase HECTD1 OS=Homo sapiens GN=HECTD1 PE=1 SV=3                                 | 0.9305              | 1.761285273                |
| Q8N3X1-2      | FNBP4_HUMAN  | Isoform 2 of Formin-binding protein 4 OS=Homo sapiens GN=FNBP4                                         | 0.9988              | 1.726831217                |
| Q13315        | ATM_HUMAN    | Serine-protein kinase ATM OS=Homo sapiens GN=ATM PE=1 SV=3                                             | 0.9882              | 1.68448284                 |
| Q8NE28        | SGK71_HUMAN  | Protein kinase-like protein SqK071 OS=Homo sapiens GN=SGK071 PE=2 SV=4                                 | 0.9888              | 1.627606838                |
| P16402        | H13_HUMAN    | Histone H1.3 OS=Homo sapiens GN=HIST1H1D PE=1 SV=2                                                     | 0.9977              | 1.599317794                |
| A4UGR9-2      | XIRP2_HUMAN  | Isoform 2 of Xin actin-binding repeat-containing protein 2 OS=Homo sapiens GN=XIRP2                    | 0.9241              | 1.550900665                |
| O00217        | NDU58_HUMAN  | NADH dehydrogenase [ubiquinone] iron-sulfur protein 8                                                  | 1                   | 1.5360529                  |
| J3KNE3        | J3KNE3_HUMAN | Platelet-activating factor acetylhydrolase IB subunit beta (Fragment) OS=Homo sapiens GN=PFAH1B2 F     | 0.9828              | 1.531069493                |
| P17480-2      | UBF1_HUMAN   | Isoform UBF2 of Nucleolar transcription factor 1 OS=Homo sapiens GN=UBTF                               | 0.9834              | 1.469885976                |
| Q9P281        | BAHC1_HUMAN  | BAH and coiled-coil domain-containing protein 1 OS=Homo sapiens GN=BAHCC1 PE=1 SV=3                    | 0.9996              | 1.448900951                |
| P60900        | PSA6_HUMAN   | Proteasome subunit alpha type-6 OS=Homo sapiens GN=PSMA6 PE=1 SV=1                                     | 1                   | 1.316145742                |
| O43464-2      | HTRA2_HUMAN  | Isoform 2 of Serine protease HTRA2                                                                     | 0.9996              | 1.286881148                |
| Q6P6C2-3      | ALKB5_HUMAN  | Isoform 3 of Probable alpha-ketoglutarate-dependent dioxygenase ABH5 OS=Homo sapiens GN=ALKBH          | 0.9974              | 1.22650853                 |
| O43497-10     | CAC1G_HUMAN  | Isoform 10 of Voltage-dependent T-type calcium channel subunit alpha-1G OS=Homo sapiens GN=CACI        | 0.978               | 1.22650853                 |
| Q9UIA9        | XPO7_HUMAN   | Exportin-7 OS=Homo sapiens GN=XPO7 PE=1 SV=3                                                           | 0.9524              | 1.22650853                 |
| Q86T03-3      | TM55B_HUMAN  | Isoform 3 of Transmembrane protein 55B OS=Homo sapiens GN=TMEM55B                                      | 0.9725              | 1.214124805                |
| P51991-2      | ROA3_HUMAN   | Isoform 2 of Heterogeneous nuclear ribonucleoprotein A3 OS=Homo sapiens GN=HNRNPA3                     | 0.9975              | 1.182692298                |
| B7Z235        | B7Z235_HUMAN | Uncharacterized protein OS=Homo sapiens PE=2 SV=1                                                      | 0.9443              | 1.176322773                |
| O43598-2      | RCL_HUMAN    | Isoform 2 of Deoxyribonucleoside 5'-monophosphate N-glycosidase OS=Homo sapiens GN=RCL                 | 0.9986              | 1.169925001                |
| Q8N6H7        | ARFG2_HUMAN  | ADP-ribosylation factor GTPase-activating protein 2 OS=Homo sapiens GN=ARFGAP2 PE=1 SV=1               | 1                   | 1.137503524                |
| H7BY33        | H7BY33_HUMAN | Coiled-coil domain-containing protein 88B OS=Homo sapiens GN=CCDC88B PE=4 SV=1                         | 1                   | 1.13093087                 |
| Q3MU16-2      | PA24E_HUMAN  | Isoform 2 of Cytosolic phospholipase A2 epsilon OS=Homo sapiens GN=PLA2G4E                             | 0.8599              | 1.13093087                 |
| Q96RW7-2      | HMCN1_HUMAN  | Isoform 2 of Hemicentin-1 OS=Homo sapiens GN=HMCN1                                                     | 0.9947              | 1.124328135                |
| Q9P035        | HACD3_HUMAN  | 3-hydroxyacyl-CoA dehydratase 3 OS=Homo sapiens GN=PTPLAD1 PE=1 SV=2                                   | 0.9985              | 1.10433666                 |
| Q8WZA9        | IRGQ_HUMAN   | Immunity-related GTPase family Q protein OS=Homo sapiens GN=IRGQ PE=1 SV=1                             | 0.9176              | 1.077242999                |
| J3KT39        | J3KT39_HUMAN | Uncharacterized protein OS=Homo sapiens PE=4 SV=1                                                      | 0.9993              | 1.049630768                |
| Q9H1A6        | Q9H1A6_HUMAN | DNA-directed RNA polymerase II subunit RPB11-a OS=Homo sapiens GN=POLR2J1 PE=2 SV=1                    | 0.9483              | 1.042644337                |
| Q09FC8-2      | ZN415_HUMAN  | Isoform 2 of Zinc finger protein 415 OS=Homo sapiens GN=ZNF415                                         | 1                   | 1                          |
| Q12874        | SF3A3_HUMAN  | Splicing factor 3A subunit 3 OS=Homo sapiens GN=SF3A3 PE=1 SV=1                                        | 1                   | 0.992768431                |
| Q9NYV4-2      | CDK12_HUMAN  | Isoform 2 of Cyclin-dependent kinase 12 OS=Homo sapiens GN=CDK12                                       | 0.9993              | 0.992768431                |
| Q9UL54-3      | TAOK2_HUMAN  | Isoform 3 of Serine/threonine-protein kinase TAO2 OS=Homo sapiens GN=TAOK2                             | 0.9724              | 0.992768431                |
| P59510        | ATS20_HUMAN  | A disintegrin and metalloproteinase with thrombospondin motifs 20 OS=Homo sapiens GN=ADAMTS20          | 0.9573              | 0.992768431                |

|           |              |                                                                                                  |        |             |
|-----------|--------------|--------------------------------------------------------------------------------------------------|--------|-------------|
| P10176    | COX8A_HUMAN  | Cytochrome c oxidase subunit 8A                                                                  | 0.9617 | 0.963474124 |
| Q8TC05    | MDM1_HUMAN   | Nuclear protein MDM1 OS=Homo sapiens GN=MDM1 PE=1 SV=2                                           | 0.9879 | 0.948600847 |
| Q9C0E4-2  | GRIP2_HUMAN  | Isoform 2 of Glutamate receptor-interacting protein 2 OS=Homo sapiens GN=GRIP2                   | 0.9847 | 0.90303827  |
| Q14164-2  | IKKE_HUMAN   | Isoform 2 of Inhibitor of nuclear factor kappa-B kinase subunit epsilon OS=Homo sapiens GN=IKBKE | 0.9823 | 0.855989697 |
| Q5F1R6-2  | DJC21_HUMAN  | Isoform 2 of DnaJ homolog subfamily C member 21 OS=Homo sapiens GN=DNAJC21                       | 0.9888 | 0.847996907 |
| Q13797    | ITA9_HUMAN   | Integrin alpha-9 OS=Homo sapiens GN=ITGA9 PE=1 SV=2                                              | 0.9991 | 0.82374936  |
| Q9BT67    | NFIP1_HUMAN  | NEDD4 family-interacting protein 1 OS=Homo sapiens GN=NFIP1 PE=1 SV=1                            | 0.9673 | 0.82374936  |
| Q6UW56-3  | ARAID_HUMAN  | Isoform 3 of All-trans retinoic acid-induced differentiation factor OS=Homo sapiens GN=ATRAID    | 0.9492 | 0.782408565 |
| Q9P1Y6-2  | PHRF1_HUMAN  | Isoform 2 of PHD and RING finger domain-containing protein 1 OS=Homo sapiens GN=PHRF1            | 0.9969 | 0.773996325 |
| Q86UP2-2  | KTN1_HUMAN   | Isoform 2 of Kinectin OS=Homo sapiens GN=KTN1                                                    | 0.9924 | 0.765534746 |
| Q6DN12-2  | MCTP2_HUMAN  | Isoform 2 of Multiple C2 and transmembrane domain-containing protein 2 OS=Homo sapiens GN=MCT1   | 0.9522 | 0.757023247 |
| Q09028-2  | RBBP4_HUMAN  | Isoform 2 of Histone-binding protein RBBP4 OS=Homo sapiens GN=RBBP4                              | 1      | 0.731183242 |
| Q14683    | SMC1A_HUMAN  | Structural maintenance of chromosomes protein 1A OS=Homo sapiens GN=SMC1A PE=1 SV=2              | 1      | 0.731183242 |
| Q9NZM5    | GSCR2_HUMAN  | Glioma tumor suppressor candidate region gene 2 protein OS=Homo sapiens GN=GLTSCR2 PE=1 SV=2     | 0.9986 | 0.731183242 |
| Q01469    | FABP5_HUMAN  | Fatty acid-binding protein                                                                       | 1      | 0.722466024 |
| O14559-11 | RHG33_HUMAN  | Isoform 3 of Rho GTPase-activating protein 33 OS=Homo sapiens GN=ARHGAP33                        | 0.994  | 0.722466024 |
| P22105    | TENX_HUMAN   | Tenascin-X OS=Homo sapiens GN=TNXB PE=1 SV=3                                                     | 1      | 0.713695815 |
| Q8TAT6-2  | NPL4_HUMAN   | Isoform 2 of Nuclear protein localization protein 4 homolog OS=Homo sapiens GN=NPLOC4            | 0.999  | 0.713695815 |
| Q58FF6    | H90B4_HUMAN  | Putative heat shock protein HSP 90-beta 4 OS=Homo sapiens GN=HSP90AB4 PE=5 SV=1                  | 0.9905 | 0.713695815 |
| HOYKE0    | HOYKE0_HUMAN | WD repeat-containing protein 72 OS=Homo sapiens GN=WDR72 PE=4 SV=1                               | 0.9668 | 0.704871964 |
| Q96Q15    | SMG1_HUMAN   | Serine/threonine-protein kinase SMG1 OS=Homo sapiens GN=SMG1 PE=1 SV=3                           | 0.9981 | 0.695993813 |
| P0C055    | H2AZ_HUMAN   | Histone H2A.Z OS=Homo sapiens GN=H2AFZ PE=1 SV=2                                                 | 0.9983 | 0.687060688 |
| P49591    | SYSC_HUMAN   | Serine--tRNA ligase                                                                              | 1      | 0.678071905 |
| Q86SP6    | GP149_HUMAN  | Probable G-protein coupled receptor 149 OS=Homo sapiens GN=GPR149 PE=2 SV=2                      | 0.9634 | 0.659924558 |
| J3KR12    | J3KR12_HUMAN | Uncharacterized protein OS=Homo sapiens PE=4 SV=1                                                | 0.9949 | 0.659924558 |
| Q9Y4A5-2  | TRRAP_HUMAN  | Isoform 2 of Transformation/transcription domain-associated protein OS=Homo sapiens GN=TRRAP     | 0.9728 | 0.632268215 |
| P98160    | PGBM_HUMAN   | Basement membrane-specific heparan sulfate proteoglycan core protein OS=Homo sapiens GN=HSPG2    | 0.9939 | 0.613531653 |
| Q96AE4-2  | FUBP1_HUMAN  | Isoform 2 of Far upstream element-binding protein 1 OS=Homo sapiens GN=FUBP1                     | 0.998  | 0.604071324 |
| P69849    | NOMO3_HUMAN  | Nodal modulator 3 OS=Homo sapiens GN=NOMO3 PE=2 SV=2                                             | 0.9997 | 0.584962501 |
| Q12972    | PP1R8_HUMAN  | Nuclear inhibitor of protein phosphatase 1 OS=Homo sapiens GN=PPP1R8 PE=1 SV=2                   | 0.9984 | 0.584962501 |
| Q9BWW7    | SCR11_HUMAN  | Transcriptional repressor scratch 1 OS=Homo sapiens GN=SCR11 PE=1 SV=1                           | 0.9997 | 0.575312331 |
| Q969S2-2  | NEIL2_HUMAN  | Isoform 2 of Endonuclease 8-like 2 OS=Homo sapiens GN=NEIL2                                      | 0.9644 | 0.555816155 |
| Q15758    | AAAT_HUMAN   | Neutral amino acid transporter B(0) OS=Homo sapiens GN=SLC1A5 PE=1 SV=2                          | 1      | 0.545968369 |
| O15230    | LAMA5_HUMAN  | Laminin subunit alpha-5 OS=Homo sapiens GN=LAMA5 PE=1 SV=8                                       | 0.9651 | 0.50589093  |
| P53597    | SUCA_HUMAN   | Succinyl-CoA ligase [ADP/GDP-forming] subunit alpha                                              | 0.9878 | 0.495695163 |
| O15399    | NMDE4_HUMAN  | Glutamate [NMDA] receptor subunit epsilon-4 OS=Homo sapiens GN=GRIN2D PE=2 SV=2                  | 0.8864 | 0.495695163 |
| Q00059    | TFAM_HUMAN   | Transcription factor A                                                                           | 0.8997 | 0.475084883 |
| Q8WZ42-2  | TITIN_HUMAN  | Isoform 2 of Titin OS=Homo sapiens GN=TTN                                                        | 1      | 0.454175893 |
| Q9NR99    | MXRA5_HUMAN  | Matrix-remodeling-associated protein 5 OS=Homo sapiens GN=MXRA5 PE=2 SV=3                        | 0.9996 | 0.443606651 |
| Q9Y617    | SERC_HUMAN   | Phosphoserine aminotransferase OS=Homo sapiens GN=PSAT1 PE=1 SV=2                                | 1      | 0.432959407 |
| O14787-2  | TNPO2_HUMAN  | Isoform 2 of Transportin-2 OS=Homo sapiens GN=TNPO2                                              | 0.982  | 0.432959407 |
| Q9Y613    | FHOD1_HUMAN  | FH1/FH2 domain-containing protein 1 OS=Homo sapiens GN=FHOD1 PE=1 SV=3                           | 0.9502 | 0.432959407 |
| P08243    | ASNS_HUMAN   | Asparagine synthetase [glutamine-hydrolyzing] OS=Homo sapiens GN=ASNS PE=1 SV=4                  | 0.9977 | 0.389566812 |
| P02545-2  | LMNA_HUMAN   | Isoform C of Prelamin-A/C OS=Homo sapiens GN=LMNA                                                | 0.8529 | 0.389566812 |
| P83731    | RL24_HUMAN   | 60S ribosomal protein L24 OS=Homo sapiens GN=RPL24 PE=1 SV=1                                     | 1      | 0.378511623 |
| Q92769    | HDAC2_HUMAN  | Histone deacetylase 2 OS=Homo sapiens GN=HDAC2 PE=1 SV=2                                         | 0.963  | 0.378511623 |
| Q9P242    | NYAP2_HUMAN  | Neuronal tyrosine-phosphorylated phosphoinositide-3-kinase adapter 2 OS=Homo sapiens GN=NYAP2 F  | 0.972  | 0.367371066 |
| P62750    | RL23A_HUMAN  | 60S ribosomal protein L23a OS=Homo sapiens GN=RPL23A PE=1 SV=1                                   | 0.9996 | 0.35614381  |
| A6ND36-2  | FAM83G_HUMAN | Isoform 2 of Protein FAM83G OS=Homo sapiens GN=FAM83G                                            | 0.9975 | 0.35614381  |
| P00491    | PNPH_HUMAN   | Purine nucleoside phosphorylase OS=Homo sapiens GN=PNP PE=1 SV=2                                 | 1      | 0.344828497 |
| H7BZJ3    | H7BZJ3_HUMAN | Thioredoxin (Fragment) OS=Homo sapiens GN=PDIA3 PE=3 SV=1                                        | 1      | 0.344828497 |
| P07355-2  | ANXA2_HUMAN  | Isoform 2 of Annexin A2 OS=Homo sapiens GN=ANXA2                                                 | 1      | 0.344828497 |
| P18754-2  | RCC1_HUMAN   | Isoform 2 of Regulator of chromosome condensation OS=Homo sapiens GN=RCC1                        | 1      | 0.344828497 |
| P53999    | TCP4_HUMAN   | Activated RNA polymerase II transcriptional coactivator p15 OS=Homo sapiens GN=SUB1 PE=1 SV=3    | 1      | 0.333423734 |
| Q9HAV7    | GRPE1_HUMAN  | GrpE protein homolog 1                                                                           | 1      | 0.333423734 |
| O15144    | ARPC2_HUMAN  | Actin-related protein 2/3 complex subunit 2 OS=Homo sapiens GN=ARPC2 PE=1 SV=1                   | 0.9945 | 0.333423734 |
| Q12791-2  | KCMA1_HUMAN  | Isoform 2 of Calcium-activated potassium channel subunit alpha-1 OS=Homo sapiens GN=KCNMA1       | 0.9346 | 0.333423734 |
| Q9BZ55-1  | API5_HUMAN   | Isoform 1 of Apoptosis inhibitor 5 OS=Homo sapiens GN=API5                                       | 1      | 0.321928095 |
| Q9YZZ0-2  | SUGT1_HUMAN  | Isoform 2 of Suppressor of G2 allele of SKP1 homolog OS=Homo sapiens GN=SUGT1                    | 1      | 0.321928095 |
| Q5XX13-2  | FBW10_HUMAN  | Isoform 2 of F-box/WD repeat-containing protein 10 OS=Homo sapiens GN=FBXW10                     | 0.933  | 0.321928095 |
| P14866    | HNRPL_HUMAN  | Heterogeneous nuclear ribonucleoprotein L OS=Homo sapiens GN=HNRPL PE=1 SV=2                     | 1      | 0.310340121 |
| Q92688-2  | AN32B_HUMAN  | Isoform 2 of Acidic leucine-rich nuclear phosphoprotein 32 family member B OS=Homo sapiens GN=AN | 1      | 0.310340121 |
| P62191    | PRS4_HUMAN   | 26S protease regulatory subunit 4 OS=Homo sapiens GN=PSMC1 PE=1 SV=1                             | 1      | 0.286881148 |
| P62424    | RL7A_HUMAN   | 60S ribosomal protein L7a OS=Homo sapiens GN=RPL7A PE=1 SV=2                                     | 1      | 0.286881148 |
| P08195-2  | 4F2_HUMAN    | Isoform 2 of 4F2 cell-surface antigen heavy chain OS=Homo sapiens GN=SLC3A2                      | 1      | 0.286881148 |
| H0Y858    | H0Y858_HUMAN | Uncharacterized protein (Fragment) OS=Homo sapiens PE=4 SV=1                                     | 0.9999 | 0.286881148 |
| P50502    | F10A1_HUMAN  | Hsc70-interacting protein OS=Homo sapiens GN=ST13 PE=1 SV=2                                      | 0.9998 | 0.286881148 |
| B4DWW1    | B4DWW1_HUMAN | ADP-ribosylation factor-like protein 1 OS=Homo sapiens GN=ARL1 PE=2 SV=1                         | 0.9991 | 0.286881148 |
| Q9C0K0-2  | BC11B_HUMAN  | Isoform 2 of B-cell lymphoma/leukemia 11B OS=Homo sapiens GN=BCL11B                              | 0.9859 | 0.286881148 |
| P46926    | GNPI1_HUMAN  | Glucosamine-6-phosphate isomerase 1 OS=Homo sapiens GN=GNPDA1 PE=1 SV=1                          | 1      | 0.275007047 |
| P61313    | RL15_HUMAN   | 60S ribosomal protein L15 OS=Homo sapiens GN=RPL15 PE=1 SV=2                                     | 1      | 0.275007047 |
| J3KN67    | J3KN67_HUMAN | Tropomyosin alpha-3 chain OS=Homo sapiens GN=TPM3 PE=3 SV=1                                      | 1      | 0.275007047 |
| P61163    | ACTZ_HUMAN   | Alpha-centractin OS=Homo sapiens GN=ACTR1A PE=1 SV=1                                             | 1      | 0.275007047 |
| Q9Y3D6    | FIS1_HUMAN   | Mitochondrial fission 1 protein OS=Homo sapiens GN=FIS1 PE=1 SV=2                                | 1      | 0.263034406 |
| P54920    | SNAA_HUMAN   | Alpha-soluble NSF attachment protein OS=Homo sapiens GN=NAPA PE=1 SV=3                           | 1      | 0.263034406 |
| Q5SSJ5-2  | HP1B3_HUMAN  | Isoform 2 of Heterochromatin protein 1-binding protein 3 OS=Homo sapiens GN=HP1BP3               | 0.9997 | 0.263034406 |
| Q92820    | GGH_HUMAN    | Gamma-glutamyl hydrolase OS=Homo sapiens GN=GGH PE=1 SV=2                                        | 0.9976 | 0.263034406 |
| Q5SNV9-2  | CA167_HUMAN  | Isoform 2 of Uncharacterized protein C1orf167 OS=Homo sapiens GN=C1orf167                        | 0.9434 | 0.263034406 |
| P60981-2  | DEST_HUMAN   | Isoform 2 of Destrin OS=Homo sapiens GN=DESTN                                                    | 1      | 0.250961574 |
| Q8N2E6    | TOR2X_HUMAN  | Prosalusin OS=Homo sapiens GN=TOR2A PE=1 SV=1                                                    | 0.9888 | 0.250961574 |
| Q08170    | SRSF4_HUMAN  | Serine/arginine-rich splicing factor 4 OS=Homo sapiens GN=SRSF4 PE=1 SV=2                        | 0.9517 | 0.250961574 |
| O15355    | PPM1G_HUMAN  | Protein phosphatase 1G OS=Homo sapiens GN=PPM1G PE=1 SV=1                                        | 1      | 0.23878686  |
| P13995    | MTDC_HUMAN   | Bifunctional methylenetetrahydrofolate dehydrogenase/cyclohydrolase                              | 1      | 0.23878686  |
| P41227    | NAA10_HUMAN  | N-alpha-acetyltransferase 10 OS=Homo sapiens GN=NAA10 PE=1 SV=1                                  | 1      | 0.23878686  |
| P82979    | SARNP_HUMAN  | SAP domain-containing ribonucleoprotein OS=Homo sapiens GN=SARNP PE=1 SV=3                       | 1      | 0.23878686  |
| Q13085-2  | ACACA_HUMAN  | Isoform 2 of Acetyl-CoA carboxylase 1 OS=Homo sapiens GN=ACACA                                   | 1      | 0.23878686  |
| Q9BQ04    | RBM4B_HUMAN  | RNA-binding protein 4B OS=Homo sapiens GN=RBM4B PE=1 SV=1                                        | 1      | 0.23878686  |
| Q13158    | FADD_HUMAN   | Protein FADD OS=Homo sapiens GN=FADD PE=1 SV=1                                                   | 0.9902 | 0.23878686  |
| P35268    | RL22_HUMAN   | 60S ribosomal protein L22 OS=Homo sapiens GN=RPL22 PE=1 SV=2                                     | 1      | 0.22650853  |
| P28074    | PSB5_HUMAN   | Proteasome subunit beta type-5 OS=Homo sapiens GN=PSMB5 PE=1 SV=3                                | 1      | 0.22650853  |
| Q9C0H9-5  | SRCN1_HUMAN  | Isoform 4 of SRC kinase signaling inhibitor 1 OS=Homo sapiens GN=SRCIN1                          | 1      | 0.22650853  |
| Q9H3K6-2  | BOLA2_HUMAN  | Isoform 2 of BOLA-like protein 2 OS=Homo sapiens GN=BOLA2                                        | 0.9997 | 0.22650853  |

|          |              |                                                                                                   |        |             |
|----------|--------------|---------------------------------------------------------------------------------------------------|--------|-------------|
| Q9P210   | CPSF2_HUMAN  | Cleavage and polyadenylation specificity factor subunit 2 OS=Homo sapiens GN=CPSF2 PE=1 SV=2      | 0.9997 | 0.22650853  |
| Q09161   | NCBP1_HUMAN  | Nuclear cap-binding protein subunit 1 OS=Homo sapiens GN=NCBP1 PE=1 SV=1                          | 0.9993 | 0.22650853  |
| Q6PI77   | BHLH9_HUMAN  | Protein BHLHb9 OS=Homo sapiens GN=BHLHb9 PE=2 SV=1                                                | 0.9946 | 0.22650853  |
| P53007   | TXTP_HUMAN   | Tricarboxylate transport protein                                                                  | 0.9823 | 0.22650853  |
| Q9COG0-2 | ZN407_HUMAN  | Isoform 2 of Zinc finger protein 407 OS=Homo sapiens GN=ZNF407                                    | 0.942  | 0.22650853  |
| O75131   | CPNE3_HUMAN  | Copine-3 OS=Homo sapiens GN=CPNE3 PE=1 SV=1                                                       | 0.9149 | 0.22650853  |
| Q9H773   | DCTP1_HUMAN  | dCTP pyrophosphatase 1 OS=Homo sapiens GN=DCTPP1 PE=1 SV=1                                        | 1      | 0.214124805 |
| O00148   | DX39A_HUMAN  | ATP-dependent RNA helicase DDX39A OS=Homo sapiens GN=DDX39A PE=1 SV=2                             | 1      | 0.214124805 |
| Q96AG4   | LRC59_HUMAN  | Leucine-rich repeat-containing protein 59 OS=Homo sapiens GN=LRRRC59 PE=1 SV=1                    | 1      | 0.214124805 |
| P35580-2 | MYH10_HUMAN  | Isoform 2 of Myosin-10 OS=Homo sapiens GN=MYH10                                                   | 1      | 0.214124805 |
| Q8N9K3   | YA015_HUMAN  | Putative uncharacterized protein FUJ37004 OS=Homo sapiens PE=2 SV=1                               | 0.9984 | 0.214124805 |
| Q15459   | SF3A1_HUMAN  | Splicing factor 3A subunit 1 OS=Homo sapiens GN=SF3A1 PE=1 SV=1                                   | 0.9976 | 0.214124805 |
| Q96M63   | CC114_HUMAN  | Coiled-coil domain-containing protein 114 OS=Homo sapiens GN=CCDC114 PE=2 SV=3                    | 0.9157 | 0.214124805 |
| P05455   | LA_HUMAN     | Lupus La protein OS=Homo sapiens GN=SSB PE=1 SV=2                                                 | 1      | 0.201633861 |
| P08133   | ANXA6_HUMAN  | Annexin A6 OS=Homo sapiens GN=ANXA6 PE=1 SV=3                                                     | 1      | 0.201633861 |
| P20700   | LMNB1_HUMAN  | Lamin-B1 OS=Homo sapiens GN=LMNB1 PE=1 SV=2                                                       | 1      | 0.201633861 |
| P46778   | RL21_HUMAN   | 60S ribosomal protein L21 OS=Homo sapiens GN=RPL21 PE=1 SV=2                                      | 1      | 0.201633861 |
| Q8N5C6   | SRBD1_HUMAN  | S1 RNA-binding domain-containing protein 1 OS=Homo sapiens GN=SRBD1 PE=1 SV=2                     | 0.9935 | 0.201633861 |
| P45974-2 | UBP5_HUMAN   | Isoform Short of Ubiquitin carboxyl-terminal hydrolase 5 OS=Homo sapiens GN=USP5                  | 0.888  | 0.201633861 |
| P62280   | RS11_HUMAN   | 40S ribosomal protein S11 OS=Homo sapiens GN=RPS11 PE=1 SV=3                                      | 1      | 0.189033824 |
| Q8NBT2   | SPC24_HUMAN  | Kinetochore protein Spc24 OS=Homo sapiens GN=SPC24 PE=1 SV=2                                      | 1      | 0.189033824 |
| P14868   | SYDC_HUMAN   | Aspartate--tRNA ligase                                                                            | 1      | 0.189033824 |
| Q9Y224   | CN166_HUMAN  | UPF0568 protein C14orf166 OS=Homo sapiens GN=C14orf166 PE=1 SV=1                                  | 1      | 0.189033824 |
| P31946-2 | 1433B_HUMAN  | Isoform Short of 14-3-3 protein beta/alpha OS=Homo sapiens GN=YWHAB                               | 1      | 0.189033824 |
| P40763-2 | STAT3_HUMAN  | Isoform Del-701 of Signal transducer and activator of transcription 3 OS=Homo sapiens GN=STAT3    | 0.9998 | 0.189033824 |
| Q06323   | PSME1_HUMAN  | Proteasome activator complex subunit 1 OS=Homo sapiens GN=PSME1 PE=1 SV=1                         | 0.9839 | 0.189033824 |
| P62316   | SMD2_HUMAN   | Small nuclear ribonucleoprotein Sm D2 OS=Homo sapiens GN=SNRNP2 PE=1 SV=1                         | 0.8743 | 0.189033824 |
| Q04760-2 | LGUL_HUMAN   | Isoform 2 of Lactoylglutathione lyase OS=Homo sapiens GN=GL01                                     | 1      | 0.176322773 |
| Q86V81   | THOC4_HUMAN  | THO complex subunit 4 OS=Homo sapiens GN=ALYREF PE=1 SV=3                                         | 1      | 0.176322773 |
| Q9BWD1   | THIC_HUMAN   | Acetyl-CoA acetyltransferase                                                                      | 1      | 0.176322773 |
| O00299   | CLIC1_HUMAN  | Chloride intracellular channel protein 1 OS=Homo sapiens GN=CLIC1 PE=1 SV=4                       | 1      | 0.176322773 |
| P25788-2 | PSA3_HUMAN   | Isoform 2 of Proteasome subunit alpha type-3 OS=Homo sapiens GN=PSMA3                             | 1      | 0.176322773 |
| Q02978   | M2OM_HUMAN   | Mitochondrial 2-oxoglutarate/malate carrier protein OS=Homo sapiens GN=SLC25A11 PE=1 SV=3         | 1      | 0.176322773 |
| Q07955   | SRSF1_HUMAN  | Serine/arginine-rich splicing factor 1 OS=Homo sapiens GN=SRSF1 PE=1 SV=2                         | 1      | 0.176322773 |
| Q13428-2 | TCOF_HUMAN   | Isoform 2 of Treacle protein OS=Homo sapiens GN=TCOF1                                             | 1      | 0.176322773 |
| Q8NE71-2 | ABCF1_HUMAN  | Isoform 2 of ATP-binding cassette sub-family F member 1 OS=Homo sapiens GN=ABCF1                  | 1      | 0.176322773 |
| Q9BQG0-2 | MBB1A_HUMAN  | Isoform 2 of Myb-binding protein 1A OS=Homo sapiens GN=MYBBP1A                                    | 1      | 0.176322773 |
| Q04917   | 1433F_HUMAN  | 14-3-3 protein eta OS=Homo sapiens GN=YWHAH PE=1 SV=4                                             | 1      | 0.176322773 |
| O75526   | RMXL2_HUMAN  | RNA-binding motif protein                                                                         | 0.995  | 0.163498732 |
| P49792   | RBP2_HUMAN   | E3 SUMO-protein ligase RanBP2 OS=Homo sapiens GN=RANBP2 PE=1 SV=2                                 | 0.9466 | 0.163498732 |
| Q8TEV9-2 | SMCR8_HUMAN  | Isoform 2 of Smith-Magenis syndrome chromosomal region candidate gene 8 protein OS=Homo sapiens   | 0.9039 | 0.163498732 |
| O43175   | SERA_HUMAN   | D-3-phosphoglycerate dehydrogenase OS=Homo sapiens GN=PHGDH PE=1 SV=4                             | 1      | 0.150559677 |
| P30044-2 | PRDX5_HUMAN  | Isoform Cytoplasmic+peroxisomal of Peroxiredoxin-5                                                | 1      | 0.150559677 |
| Q13011   | ECH1_HUMAN   | Delta(3)                                                                                          | 1      | 0.150559677 |
| Q99729-2 | ROAA_HUMAN   | Isoform 2 of Heterogeneous nuclear ribonucleoprotein A/B OS=Homo sapiens GN=HNRNPAB               | 1      | 0.150559677 |
| P12270   | TPR_HUMAN    | Nucleoprotein TPR OS=Homo sapiens GN=TPR PE=1 SV=3                                                | 1      | 0.150559677 |
| P34897-2 | GLYM_HUMAN   | Isoform 2 of Serine hydroxymethyltransferase                                                      | 1      | 0.150559677 |
| P52948-2 | NUP98_HUMAN  | Isoform 2 of Nuclear pore complex protein Nup98-Nup96 OS=Homo sapiens GN=NUP98                    | 1      | 0.150559677 |
| Q99613   | EIF3C_HUMAN  | Eukaryotic translation initiation factor 3 subunit C OS=Homo sapiens GN=EIF3C PE=1 SV=1           | 1      | 0.150559677 |
| A5PL33-3 | KRBA1_HUMAN  | Isoform 3 of Protein KRBA1 OS=Homo sapiens GN=KRBA1                                               | 0.97   | 0.150559677 |
| Q9BZP3-2 | CR002_HUMAN  | Isoform 2 of Putative uncharacterized protein encoded by LINC00470 OS=Homo sapiens GN=LINC00470   | 0.9663 | 0.150559677 |
| Q01484-2 | ANK2_HUMAN   | Isoform 2 of Ankyrin-2 OS=Homo sapiens GN=ANK2                                                    | 0.937  | 0.150559677 |
| P22102   | PUR2_HUMAN   | Trifunctional purine biosynthetic protein adenosine-3 OS=Homo sapiens GN=GART PE=1 SV=1           | 1      | 0.137503524 |
| P09012   | SNRPA_HUMAN  | U1 small nuclear ribonucleoprotein A OS=Homo sapiens GN=SNRPA PE=1 SV=3                           | 1      | 0.137503524 |
| Q8NB05   | DHB11_HUMAN  | Estradiol 17-beta-dehydrogenase 11 OS=Homo sapiens GN=HSD17B11 PE=1 SV=3                          | 0.9832 | 0.137503524 |
| A8K855-2 | EFCB7_HUMAN  | Isoform 2 of EF-hand calcium-binding domain-containing protein 7 OS=Homo sapiens GN=EFCAB7        | 0.9676 | 0.137503524 |
| Q9H6R3   | ACSS3_HUMAN  | Acyl-CoA synthetase short-chain family member 3                                                   | 0.9599 | 0.137503524 |
| Q9Y266   | NUDC_HUMAN   | Nuclear migration protein nudC OS=Homo sapiens GN=NUDC PE=1 SV=1                                  | 1      | 0.124328135 |
| P13797   | PLST_HUMAN   | Plastin-3 OS=Homo sapiens GN=PLS3 PE=1 SV=4                                                       | 1      | 0.124328135 |
| Q9Y490   | TLN1_HUMAN   | Talin-1 OS=Homo sapiens GN=TLN1 PE=1 SV=3                                                         | 1      | 0.124328135 |
| P55084   | ECHB_HUMAN   | Trifunctional enzyme subunit beta                                                                 | 1      | 0.124328135 |
| P62495   | ERF1_HUMAN   | Eukaryotic peptide chain release factor subunit 1 OS=Homo sapiens GN=ETF1 PE=1 SV=3               | 1      | 0.124328135 |
| P62906   | RL10A_HUMAN  | 60S ribosomal protein L10a OS=Homo sapiens GN=RPL10A PE=1 SV=2                                    | 1      | 0.124328135 |
| Q9P2G9   | KLHL8_HUMAN  | Kelch-like protein 8 OS=Homo sapiens GN=KLHL8 PE=2 SV=4                                           | 0.9994 | 0.124328135 |
| Q9Y3C8   | UFC1_HUMAN   | Ubiquitin-fold modifier-conjugating enzyme 1 OS=Homo sapiens GN=UFC1 PE=1 SV=3                    | 0.9928 | 0.124328135 |
| O14929   | HAT1_HUMAN   | Histone acetyltransferase type B catalytic subunit OS=Homo sapiens GN=HAT1 PE=1 SV=1              | 0.9517 | 0.124328135 |
| Q9UQE7   | SMC3_HUMAN   | Structural maintenance of chromosomes protein 3 OS=Homo sapiens GN=SMC3 PE=1 SV=2                 | 0.9471 | 0.124328135 |
| Q9UJU6-2 | DBNL_HUMAN   | Isoform 2 of Drebrin-like protein OS=Homo sapiens GN=DBNL                                         | 0.8911 | 0.124328135 |
| Q92522   | H1X_HUMAN    | Histone H1x OS=Homo sapiens GN=H1FX PE=1 SV=1                                                     | 1      | 0.111031312 |
| Q9Y383-2 | LCT7L2_HUMAN | Isoform 2 of Putative RNA-binding protein Luc7-like 2 OS=Homo sapiens GN=LUC7L2                   | 1      | 0.111031312 |
| O75390   | CISY_HUMAN   | Citrate synthase                                                                                  | 1      | 0.111031312 |
| P09936   | UCHL1_HUMAN  | Ubiquitin carboxyl-terminal hydrolase isozyme L1 OS=Homo sapiens GN=UCHL1 PE=1 SV=2               | 1      | 0.111031312 |
| Q14315-2 | FLNC_HUMAN   | Isoform 2 of Filamin-C OS=Homo sapiens GN=FLNC                                                    | 1      | 0.111031312 |
| P41252   | SYIC_HUMAN   | Isoleucine--tRNA ligase                                                                           | 1      | 0.111031312 |
| Q99623   | PHB2_HUMAN   | Prohibitin-2 OS=Homo sapiens GN=PHB2 PE=1 SV=2                                                    | 1      | 0.111031312 |
| C9JRL4   | C9JRL4_HUMAN | Malate dehydrogenase                                                                              | 1      | 0.111031312 |
| Q6PRD1   | GP179_HUMAN  | Probable G-protein coupled receptor 179 OS=Homo sapiens GN=GPR179 PE=1 SV=2                       | 0.9997 | 0.111031312 |
| P39748   | FEN1_HUMAN   | Flap endonuclease 1 OS=Homo sapiens GN=FEN1 PE=1 SV=1                                             | 0.9976 | 0.111031312 |
| P16152   | CBR1_HUMAN   | Carbonyl reductase [NADPH] 1 OS=Homo sapiens GN=CBR1 PE=1 SV=3                                    | 0.9946 | 0.111031312 |
| O14579-2 | COPE_HUMAN   | Isoform 2 of Coatomer subunit epsilon OS=Homo sapiens GN=COPE                                     | 0.9901 | 0.111031312 |
| Q8N1F7-2 | NUP93_HUMAN  | Isoform 2 of Nuclear pore complex protein Nup93 OS=Homo sapiens GN=NUP93                          | 0.9882 | 0.111031312 |
| P08559-2 | ODPA_HUMAN   | Isoform 2 of Pyruvate dehydrogenase E1 component subunit alpha                                    | 0.9854 | 0.111031312 |
| O43615   | TIM44_HUMAN  | Mitochondrial import inner membrane translocase subunit TIM44 OS=Homo sapiens GN=TIMM44 PE=1 SV=1 | 1      | 0.097610797 |
| P11279   | LAMP1_HUMAN  | Lysosome-associated membrane glycoprotein 1 OS=Homo sapiens GN=LAMP1 PE=1 SV=3                    | 1      | 0.097610797 |
| P55265-2 | DSRAD_HUMAN  | Isoform 2 of Double-stranded RNA-specific adenosine deaminase OS=Homo sapiens GN=ADAR             | 1      | 0.097610797 |
| P09874   | PARP1_HUMAN  | Poly [ADP-ribose] polymerase 1 OS=Homo sapiens GN=PARP1 PE=1 SV=4                                 | 1      | 0.097610797 |
| Q9UQ80   | PA2G4_HUMAN  | Proliferation-associated protein 2G4 OS=Homo sapiens GN=PA2G4 PE=1 SV=3                           | 1      | 0.097610797 |
| P36578   | RL4_HUMAN    | 60S ribosomal protein L4 OS=Homo sapiens GN=RPL4 PE=1 SV=5                                        | 1      | 0.097610797 |
| P62258   | 1433E_HUMAN  | 14-3-3 protein epsilon OS=Homo sapiens GN=YWHAE PE=1 SV=1                                         | 1      | 0.097610797 |
| P63241-2 | IF5A1_HUMAN  | Isoform 2 of Eukaryotic translation initiation factor 5A-1 OS=Homo sapiens GN=EIF5A               | 1      | 0.097610797 |
| P62857   | RS28_HUMAN   | 40S ribosomal protein S28 OS=Homo sapiens GN=RPS28 PE=1 SV=1                                      | 0.9998 | 0.097610797 |
| P78417   | GSTO1_HUMAN  | Glutathione S-transferase omega-1 OS=Homo sapiens GN=GSTO1 PE=1 SV=2                              | 1      | 0.084064265 |

|          |              |                                                                                                    |        |             |
|----------|--------------|----------------------------------------------------------------------------------------------------|--------|-------------|
| P61158   | ARP3_HUMAN   | Actin-related protein 3 OS=Homo sapiens GN=ACTR3 PE=1 SV=3                                         | 1      | 0.084064265 |
| Q06830   | PRDX1_HUMAN  | Peroxiredoxin-1 OS=Homo sapiens GN=PRDX1 PE=1 SV=1                                                 | 1      | 0.084064265 |
| Q96776-8 | MMS19_HUMAN  | Isoform 5 of MMS19 nucleotide excision repair protein homolog OS=Homo sapiens GN=MMS19             | 1      | 0.084064265 |
| Q9UKN7   | MYO15_HUMAN  | Unconventional myosin-XV OS=Homo sapiens GN=MYO15A PE=1 SV=2                                       | 0.9999 | 0.084064265 |
| O14979-2 | HNRDL_HUMAN  | Isoform 2 of Heterogeneous nuclear ribonucleoprotein D-like OS=Homo sapiens GN=HNRPDL              | 0.9805 | 0.084064265 |
| Q99661-2 | KIF2C_HUMAN  | Isoform 2 of Kinesin-like protein KIF2C OS=Homo sapiens GN=KIF2C                                   | 0.9642 | 0.084064265 |
| O00429-2 | DNM1L_HUMAN  | Isoform 4 of Dynamin-1-like protein OS=Homo sapiens GN=DNM1L                                       | 0.9186 | 0.084064265 |
| P49207   | RL34_HUMAN   | 60S ribosomal protein L34 OS=Homo sapiens GN=RPL34 PE=1 SV=3                                       | 1      | 0.070389328 |
| P55854   | SUMO3_HUMAN  | Small ubiquitin-related modifier 3 OS=Homo sapiens GN=SUMO3 PE=1 SV=2                              | 1      | 0.070389328 |
| P62910   | RL32_HUMAN   | 60S ribosomal protein L32 OS=Homo sapiens GN=RPL32 PE=1 SV=2                                       | 1      | 0.070389328 |
| Q15691   | MARE1_HUMAN  | Microtubule-associated protein RP/EB family member 1 OS=Homo sapiens GN=MAPRE1 PE=1 SV=3           | 1      | 0.070389328 |
| O43390-2 | HNRPR_HUMAN  | Isoform 2 of Heterogeneous nuclear ribonucleoprotein R OS=Homo sapiens GN=HNRNPR                   | 1      | 0.070389328 |
| P54687-3 | BCAT1_HUMAN  | Isoform 3 of Branched-chain-amino-acid aminotransferase                                            | 1      | 0.070389328 |
| P61088   | UBE2N_HUMAN  | Ubiquitin-conjugating enzyme E2 N OS=Homo sapiens GN=UBE2N PE=1 SV=1                               | 1      | 0.070389328 |
| P62244   | RS15A_HUMAN  | 40S ribosomal protein S15a OS=Homo sapiens GN=RPS15A PE=1 SV=2                                     | 1      | 0.070389328 |
| Q9Y230   | RUVB2_HUMAN  | RuvB-like 2 OS=Homo sapiens GN=RUVBL2 PE=1 SV=3                                                    | 1      | 0.070389328 |
| A8K0Z3   | WASH1_HUMAN  | WAS protein family homolog 1 OS=Homo sapiens GN=WASH1 PE=1 SV=2                                    | 0.9998 | 0.070389328 |
| Q9BXJ9-4 | NAA15_HUMAN  | Isoform 2 of N-alpha-acetyltransferase 15                                                          | 0.9998 | 0.070389328 |
| O43818   | U3IP2_HUMAN  | U3 small nucleolar RNA-interacting protein 2 OS=Homo sapiens GN=RRP9 PE=1 SV=1                     | 0.9964 | 0.070389328 |
| Q92979   | NEP1_HUMAN   | Ribosomal RNA small subunit methyltransferase NEP1 OS=Homo sapiens GN=EMG1 PE=1 SV=4               | 0.994  | 0.070389328 |
| Q9Y6Y8   | S23IP_HUMAN  | SEC23-interacting protein OS=Homo sapiens GN=SEC23IP PE=1 SV=1                                     | 0.9744 | 0.070389328 |
| P12035   | K2C3_HUMAN   | Keratin                                                                                            | 0.9666 | 0.070389328 |
| P33991   | MCM4_HUMAN   | DNA replication licensing factor MCM4 OS=Homo sapiens GN=MCM4 PE=1 SV=5                            | 1      | 0.056583528 |
| Q01081-2 | U2AF1_HUMAN  | Isoform 2 of Splicing factor U2AF 35 kDa subunit OS=Homo sapiens GN=U2AF1                          | 1      | 0.056583528 |
| P15121   | ALDR_HUMAN   | Aldehyde reductase OS=Homo sapiens GN=AKR1B1 PE=1 SV=3                                             | 1      | 0.056583528 |
| P32969   | RL9_HUMAN    | 60S ribosomal protein L9 OS=Homo sapiens GN=RPL9 PE=1 SV=1                                         | 1      | 0.056583528 |
| P49588   | SYAC_HUMAN   | Alanine--tRNA ligase                                                                               | 1      | 0.056583528 |
| Q13813-2 | SPTN1_HUMAN  | Isoform 2 of Spectrin alpha chain                                                                  | 1      | 0.056583528 |
| Q14498-2 | RBM39_HUMAN  | Isoform 2 of RNA-binding protein 39 OS=Homo sapiens GN=RBM39                                       | 1      | 0.056583528 |
| Q99436   | PSB7_HUMAN   | Proteasome subunit beta type-7 OS=Homo sapiens GN=PSMB7 PE=1 SV=1                                  | 1      | 0.056583528 |
| P61981   | 1433G_HUMAN  | 14-3-3 protein gamma OS=Homo sapiens GN=YWHAG PE=1 SV=2                                            | 1      | 0.056583528 |
| P55196-1 | AFAD_HUMAN   | Isoform 2 of Afadin OS=Homo sapiens GN=MLLT4                                                       | 0.9999 | 0.056583528 |
| O15371   | EIF3D_HUMAN  | Eukaryotic translation initiation factor 3 subunit D OS=Homo sapiens GN=EIF3D PE=1 SV=1            | 0.9992 | 0.056583528 |
| P08123   | CO1A2_HUMAN  | Collagen alpha-2(I) chain OS=Homo sapiens GN=COL1A2 PE=1 SV=7                                      | 0.9972 | 0.056583528 |
| D6RIA3   | D6RIA3_HUMAN | Uncharacterized protein OS=Homo sapiens PE=4 SV=1                                                  | 0.9818 | 0.056583528 |
| P51812   | KS6A3_HUMAN  | Ribosomal protein S6 kinase alpha-3 OS=Homo sapiens GN=RPS6KA3 PE=1 SV=1                           | 0.9544 | 0.056583528 |
| Q5H9R7-2 | PP6R3_HUMAN  | Isoform 2 of Serine/threonine-protein phosphatase 6 regulatory subunit 3 OS=Homo sapiens GN=PPP6R  | 0.9477 | 0.056583528 |
| P04632   | CPNS1_HUMAN  | Calpain small subunit 1 OS=Homo sapiens GN=CAPNS1 PE=1 SV=1                                        | 1      | 0.042644337 |
| P48556   | PSMD8_HUMAN  | 26S proteasome non-ATPase regulatory subunit 8 OS=Homo sapiens GN=PSMD8 PE=1 SV=2                  | 1      | 0.042644337 |
| Q14566   | MCM6_HUMAN   | DNA replication licensing factor MCM6 OS=Homo sapiens GN=MCM6 PE=1 SV=1                            | 1      | 0.042644337 |
| Q5T2A2   | CROCC_HUMAN  | Rootletin OS=Homo sapiens GN=CROCC PE=1 SV=1                                                       | 1      | 0.042644337 |
| P13591-1 | NCAM1_HUMAN  | Isoform 2 of Neural cell adhesion molecule 1 OS=Homo sapiens GN=NCAM1                              | 1      | 0.042644337 |
| P15170-2 | ERF3A_HUMAN  | Isoform 2 of Eukaryotic peptide chain release factor GTP-binding subunit ERF3A OS=Homo sapiens GN= | 1      | 0.042644337 |
| P25205   | MCM3_HUMAN   | DNA replication licensing factor MCM3 OS=Homo sapiens GN=MCM3 PE=1 SV=3                            | 1      | 0.042644337 |
| P61204   | ARF3_HUMAN   | ADP-ribosylation factor 3 OS=Homo sapiens GN=ARF3 PE=1 SV=2                                        | 1      | 0.042644337 |
| P84090   | ERH_HUMAN    | Enhancer of rudimentary homolog OS=Homo sapiens GN=ERH PE=1 SV=1                                   | 1      | 0.042644337 |
| Q15181   | IPYR_HUMAN   | Inorganic pyrophosphatase OS=Homo sapiens GN=PPA1 PE=1 SV=2                                        | 1      | 0.042644337 |
| Q9HB71   | CYBP_HUMAN   | Calycylin-binding protein OS=Homo sapiens GN=CACYBP PE=1 SV=2                                      | 1      | 0.042644337 |
| Q9Y3F4   | STRAP_HUMAN  | Serine-threonine kinase receptor-associated protein OS=Homo sapiens GN=STRAP PE=1 SV=1             | 1      | 0.042644337 |
| Q9NV17-1 | FANCI_HUMAN  | Isoform 1 of Fanconi anemia group I protein OS=Homo sapiens GN=FANCI                               | 0.9999 | 0.042644337 |
| Q9BT78   | CSN4_HUMAN   | COP9 signalosome complex subunit 4 OS=Homo sapiens GN=COPS4 PE=1 SV=1                              | 0.9928 | 0.042644337 |
| Q70CQ4   | UBP31_HUMAN  | Ubiquitin carboxyl-terminal hydrolase 31 OS=Homo sapiens GN=USP31 PE=1 SV=2                        | 0.9974 | 0.042644337 |
| P10606   | COX5B_HUMAN  | Cytochrome c oxidase subunit 5B                                                                    | 0.9813 | 0.042644337 |
| Q92830-2 | KAT2A_HUMAN  | Isoform 2 of Histone acetyltransferase KAT2A OS=Homo sapiens GN=KAT2A                              | 0.9675 | 0.042644337 |
| P17174   | AATC_HUMAN   | Aspartate aminotransferase                                                                         | 1      | 0.028569152 |
| P26368-2 | U2AF2_HUMAN  | Isoform 2 of Splicing factor U2AF 65 kDa subunit OS=Homo sapiens GN=U2AF2                          | 1      | 0.028569152 |
| P51648-2 | AL3A2_HUMAN  | Isoform 2 of Fatty aldehyde dehydrogenase OS=Homo sapiens GN=ALDH3A2                               | 1      | 0.028569152 |
| Q96P70   | IPO9_HUMAN   | Importin-9 OS=Homo sapiens GN=IPO9 PE=1 SV=3                                                       | 1      | 0.028569152 |
| Q9P2J5   | SYLC_HUMAN   | Leucine--tRNA ligase                                                                               | 1      | 0.028569152 |
| P15531-2 | NDKA_HUMAN   | Isoform 2 of Nucleoside diphosphate kinase A OS=Homo sapiens GN=NME1                               | 1      | 0.028569152 |
| P25786-2 | PSA1_HUMAN   | Isoform Long of Proteasome subunit alpha type-1 OS=Homo sapiens GN=PSMA1                           | 1      | 0.028569152 |
| Q01082   | SPTB2_HUMAN  | Spectrin beta chain                                                                                | 1      | 0.028569152 |
| Q12931   | TRAP1_HUMAN  | Heat shock protein 75 kDa                                                                          | 1      | 0.028569152 |
| P00492   | HPRT_HUMAN   | Hypoxanthine-guanine phosphoribosyltransferase OS=Homo sapiens GN=HPRT1 PE=1 SV=2                  | 0.9999 | 0.028569152 |
| P06454-2 | PTMA_HUMAN   | Isoform 2 of Prothymosin alpha OS=Homo sapiens GN=PTMA                                             | 0.9994 | 0.028569152 |
| Q9BTE3-2 | MCMBP_HUMAN  | Isoform 2 of Mini-chromosome maintenance complex-binding protein OS=Homo sapiens GN=MCMBP          | 0.9929 | 0.028569152 |
| Q9ULI3   | HEG1_HUMAN   | Protein HEG homolog 1 OS=Homo sapiens GN=HEG1 PE=1 SV=3                                            | 0.9465 | 0.028569152 |
| Q9H0B3-3 | K1683_HUMAN  | Isoform 3 of Uncharacterized protein KIAA1683 OS=Homo sapiens GN=KIAA1683                          | 0.9327 | 0.028569152 |
| Q8N2E2   | VWDE_HUMAN   | von Willebrand factor D and EGF domain-containing protein OS=Homo sapiens GN=VWDE PE=2 SV=4        | 0.9099 | 0.028569152 |
| P21266   | GSTM3_HUMAN  | Glutathione S-transferase Mu 3 OS=Homo sapiens GN=GSTM3 PE=1 SV=3                                  | 0.8802 | 0.028569152 |
| O00232-2 | PSD12_HUMAN  | Isoform 2 of 26S proteasome non-ATPase regulatory subunit 12 OS=Homo sapiens GN=PSMD12             | 1      | 0.014355293 |
| O43143   | DHX15_HUMAN  | Putative pre-mRNA-splicing factor ATP-dependent RNA helicase DHX15 OS=Homo sapiens GN=DHX15 I      | 1      | 0.014355293 |
| Q14444-2 | CAPR1_HUMAN  | Isoform 2 of Caprin-1 OS=Homo sapiens GN=CAPRIN1                                                   | 1      | 0.014355293 |
| Q9BPX3   | CND3_HUMAN   | Condensin complex subunit 3 OS=Homo sapiens GN=NCAPG PE=1 SV=1                                     | 1      | 0.014355293 |
| Q9NWW8-3 | BABA1_HUMAN  | Isoform 3 of BRISC and BRCA1-A complex member 1 OS=Homo sapiens GN=BABAM1                          | 1      | 0.014355293 |
| O14980   | XPO1_HUMAN   | Exportin-1 OS=Homo sapiens GN=XPO1 PE=1 SV=1                                                       | 1      | 0.014355293 |
| P00367   | DHE3_HUMAN   | Glutamate dehydrogenase 1                                                                          | 1      | 0.014355293 |
| P25789   | PSA4_HUMAN   | Proteasome subunit alpha type-4 OS=Homo sapiens GN=PSMA4 PE=1 SV=1                                 | 1      | 0.014355293 |
| P29401   | TKT_HUMAN    | Transketolase OS=Homo sapiens GN=TKT PE=1 SV=3                                                     | 1      | 0.014355293 |
| P31150   | GDIA_HUMAN   | Rab GDP dissociation inhibitor alpha OS=Homo sapiens GN=GD1I PE=1 SV=2                             | 1      | 0.014355293 |
| P33992   | MCM5_HUMAN   | DNA replication licensing factor MCM5 OS=Homo sapiens GN=MCM5 PE=1 SV=5                            | 1      | 0.014355293 |
| P38117   | ETFB_HUMAN   | Electron transfer flavoprotein subunit beta OS=Homo sapiens GN=ETFB PE=1 SV=3                      | 1      | 0.014355293 |
| P49368-2 | TCPG_HUMAN   | Isoform 2 of T-complex protein 1 subunit gamma OS=Homo sapiens GN=CCT3                             | 1      | 0.014355293 |
| P61978-2 | HNRPK_HUMAN  | Isoform 2 of Heterogeneous nuclear ribonucleoprotein K OS=Homo sapiens GN=HNRNPK                   | 1      | 0.014355293 |
| P78347-2 | GTF2I_HUMAN  | Isoform 2 of General transcription factor II-I OS=Homo sapiens GN=GTF2I                            | 1      | 0.014355293 |
| Q15185   | TEBP_HUMAN   | Prostaglandin E synthase 3 OS=Homo sapiens GN=PTGES3 PE=1 SV=1                                     | 1      | 0.014355293 |
| Q92945   | FUBP2_HUMAN  | Far upstream element-binding protein 2 OS=Homo sapiens GN=KHSRP PE=1 SV=4                          | 1      | 0.014355293 |
| Q9HAV4   | XPO5_HUMAN   | Exportin-5 OS=Homo sapiens GN=XPO5 PE=1 SV=1                                                       | 1      | 0.014355293 |
| B4DLN1   | B4DLN1_HUMAN | Mitochondrial dicarboxylate carrier OS=Homo sapiens GN=SLC25A10 PE=2 SV=1                          | 1      | 0.014355293 |
| Q08752   | PPID_HUMAN   | Peptidyl-prolyl cis-trans isomerase D OS=Homo sapiens GN=PPID PE=1 SV=3                            | 0.9999 | 0.014355293 |
| P42167-2 | LAP2B_HUMAN  | Isoform Gamma of Lamina-associated polypeptide 2                                                   | 0.9998 | 0.014355293 |
| O95104-2 | SFR15_HUMAN  | Isoform 2 of Splicing factor                                                                       | 0.9997 | 0.014355293 |

|          |              |                                                                                                 |        |              |
|----------|--------------|-------------------------------------------------------------------------------------------------|--------|--------------|
| P49903   | SPS1_HUMAN   | Selenide                                                                                        | 0.9997 | 0.014355293  |
| P15927-2 | RFA2_HUMAN   | Isoform 2 of Replication protein A 32 kDa subunit OS=Homo sapiens GN=RPA2                       | 0.9989 | 0.014355293  |
| O75915   | PRAF3_HUMAN  | PRA1 family protein 3 OS=Homo sapiens GN=ARL6IP5 PE=1 SV=1                                      | 0.9772 | 0.014355293  |
| O15553   | MEFV_HUMAN   | Pyrin OS=Homo sapiens GN=MEFV PE=1 SV=1                                                         | 0.9494 | 0.014355293  |
| O75396   | SC22B_HUMAN  | Vesicle-trafficking protein SEC22b OS=Homo sapiens GN=SEC22B PE=1 SV=4                          | 1      | 0            |
| Q92499   | DDX1_HUMAN   | ATP-dependent RNA helicase DDX1 OS=Homo sapiens GN=DDX1 PE=1 SV=2                               | 1      | 0            |
| P06733   | ENOA_HUMAN   | Alpha-enolase OS=Homo sapiens GN=ENO1 PE=1 SV=2                                                 | 1      | 0            |
| P07900-2 | HS90A_HUMAN  | Isoform 2 of Heat shock protein HSP 90-alpha OS=Homo sapiens GN=HSP90AA1                        | 1      | 0            |
| P08758   | ANXA5_HUMAN  | Annexin A5 OS=Homo sapiens GN=ANXA5 PE=1 SV=2                                                   | 1      | 0            |
| P17812   | PYRG1_HUMAN  | CTP synthase 1 OS=Homo sapiens GN=CTPS1 PE=1 SV=2                                               | 1      | 0            |
| P19338   | NUCL_HUMAN   | Nucleolin OS=Homo sapiens GN=NCL PE=1 SV=3                                                      | 1      | 0            |
| P78527-2 | PRKDC_HUMAN  | Isoform 2 of DNA-dependent protein kinase catalytic subunit OS=Homo sapiens GN=PRKDC            | 1      | 0            |
| Q01105-2 | SET_HUMAN    | Isoform 2 of Protein SET OS=Homo sapiens GN=SET                                                 | 1      | 0            |
| Q12906-2 | ILF3_HUMAN   | Isoform 2 of Interleukin enhancer-binding factor 3 OS=Homo sapiens GN=ILF3                      | 1      | 0            |
| Q99829   | CPNE1_HUMAN  | Copine-1 OS=Homo sapiens GN=CPNE1 PE=1 SV=1                                                     | 1      | 0            |
| Q9UBT2   | SAE2_HUMAN   | SUMO-activating enzyme subunit 2 OS=Homo sapiens GN=UBA2 PE=1 SV=2                              | 1      | 0            |
| Q9UNZ2-4 | NSF1C_HUMAN  | Isoform 2 of NSF1L cofactor p47 OS=Homo sapiens GN=NSF1C                                        | 1      | 0            |
| E9PNX1   | E9PNX1_HUMAN | Serpin H1 (Fragment) OS=Homo sapiens GN=SERPINH1 PE=3 SV=1                                      | 1      | 0            |
| Q98VA1   | TBB2B_HUMAN  | Tubulin beta-2B chain OS=Homo sapiens GN=TUBB2B PE=1 SV=1                                       | 1      | 0            |
| Q9Y4G6   | TLN2_HUMAN   | Talin-2 OS=Homo sapiens GN=TLN2 PE=1 SV=4                                                       | 0.9999 | 0            |
| P05091   | ALDH2_HUMAN  | Aldehyde dehydrogenase                                                                          | 0.9996 | 0            |
| Q8WXF1-2 | PSPC1_HUMAN  | Isoform 2 of Paraspeckle component 1 OS=Homo sapiens GN=PSPC1                                   | 0.9995 | 0            |
| O75570   | RF1M_HUMAN   | Peptide chain release factor 1                                                                  | 0.9987 | 0            |
| Q9Y276   | BCS1_HUMAN   | Mitochondrial chaperone BCS1 OS=Homo sapiens GN=BCS1L PE=1 SV=1                                 | 0.996  | 0            |
| O60256   | KPRB_HUMAN   | Phosphoribosyl pyrophosphate synthase-associated protein 2 OS=Homo sapiens GN=PRPSAP2 PE=1 SV:1 | 0.9911 | 0            |
| Q13724   | MOGS_HUMAN   | Mannosyl-oligosaccharide glucosidase OS=Homo sapiens GN=MOGS PE=1 SV=5                          | 0.986  | 0            |
| Q9Y2S7   | PDIP2_HUMAN  | Polymerase delta-interacting protein 2 OS=Homo sapiens GN=POLDIP2 PE=1 SV=1                     | 0.9607 | 0            |
| Q6ZRY4   | RBP52_HUMAN  | RNA-binding protein with multiple splicing 2 OS=Homo sapiens GN=RBPMS2 PE=2 SV=1                | 0.9318 | 0            |
| O75400-2 | PR40A_HUMAN  | Isoform 2 of Pre-mRNA-processing factor 40 homolog A OS=Homo sapiens GN=PRPF40A                 | 1      | -0.01449957  |
| O95232-2 | LC7L3_HUMAN  | Isoform 2 of Luc7-like protein 3 OS=Homo sapiens GN=LUC7L3                                      | 1      | -0.01449957  |
| P07814   | SYEP_HUMAN   | Bifunctional glutamate/proline-tRNA ligase OS=Homo sapiens GN=EPRS PE=1 SV=5                    | 1      | -0.01449957  |
| P54577   | SYIC_HUMAN   | Tyrosine-tRNA ligase                                                                            | 1      | -0.01449957  |
| Q03252   | LMNB2_HUMAN  | Lamin-B2 OS=Homo sapiens GN=LMNB2 PE=1 SV=3                                                     | 1      | -0.01449957  |
| Q96AB3-2 | ISOC2_HUMAN  | Isoform 2 of Isochorismatase domain-containing protein 2                                        | 1      | -0.01449957  |
| P13010   | XRCC5_HUMAN  | X-ray repair cross-complementing protein 5 OS=Homo sapiens GN=XRCC5 PE=1 SV=3                   | 1      | -0.01449957  |
| P46821   | MAP1B_HUMAN  | Microtubule-associated protein 1B OS=Homo sapiens GN=MAP1B PE=1 SV=2                            | 1      | -0.01449957  |
| P55786   | PSA_HUMAN    | Puromycin-sensitive aminopeptidase OS=Homo sapiens GN=NPEPPS PE=1 SV=2                          | 1      | -0.01449957  |
| P55884-2 | EIF3B_HUMAN  | Isoform 2 of Eukaryotic translation initiation factor 3 subunit B OS=Homo sapiens GN=EIF3B      | 1      | -0.01449957  |
| P63104   | 1433Z_HUMAN  | 14-3-3 protein zeta/delta OS=Homo sapiens GN=YWHAZ PE=1 SV=1                                    | 1      | -0.01449957  |
| Q92973-2 | TNPO1_HUMAN  | Isoform 2 of Transportin-1 OS=Homo sapiens GN=TNPO1                                             | 1      | -0.01449957  |
| Q13263   | TIF1B_HUMAN  | Transcription intermediary factor 1-beta OS=Homo sapiens GN=TRIM28 PE=1 SV=5                    | 1      | -0.01449957  |
| Q92621   | NU205_HUMAN  | Nuclear pore complex protein Nup205 OS=Homo sapiens GN=NUP205 PE=1 SV=3                         | 1      | -0.01449957  |
| Q93008-1 | USP9X_HUMAN  | Isoform 2 of Probable ubiquitin carboxyl-terminal hydrolase FAF-X OS=Homo sapiens GN=USP9X      | 1      | -0.01449957  |
| P27348   | 1433T_HUMAN  | 14-3-3 protein theta OS=Homo sapiens GN=YWHAQ PE=1 SV=1                                         | 1      | -0.01449957  |
| P51665   | PSD7_HUMAN   | 26S proteasome non-ATPase regulatory subunit 7 OS=Homo sapiens GN=PSMD7 PE=1 SV=2               | 0.9999 | -0.01449957  |
| P12236   | ADT3_HUMAN   | ADP/ATP translocase 3 OS=Homo sapiens GN=SLC25A6 PE=1 SV=4                                      | 0.9996 | -0.01449957  |
| O15173   | PGRMC2_HUMAN | Membrane-associated progesterone receptor component 2 OS=Homo sapiens GN=PGRMC2 PE=1 SV=1       | 0.9967 | -0.01449957  |
| Q7Z2Y8   | GVIN1_HUMAN  | Interferon-induced very large GTPase 1 OS=Homo sapiens GN=GVINP1 PE=2 SV=2                      | 0.9928 | -0.01449957  |
| F8WD12   | F8WD12_HUMAN | SET domain-containing protein 5 OS=Homo sapiens GN=SETD5 PE=4 SV=1                              | 0.982  | -0.01449957  |
| Q6ZUM4-3 | RHG27_HUMAN  | Isoform 3 of Rho GTPase-activating protein 27 OS=Homo sapiens GN=ARHGAP27                       | 0.9791 | -0.01449957  |
| P29322   | EPHA8_HUMAN  | Ephrin type-A receptor 8 OS=Homo sapiens GN=EPHA8 PE=1 SV=2                                     | 0.9725 | -0.01449957  |
| Q86TC9   | MYPN_HUMAN   | Myopalladin OS=Homo sapiens GN=MYPN PE=1 SV=2                                                   | 0.9485 | -0.01449957  |
| P13637   | AT1A3_HUMAN  | Sodium/potassium-transporting ATPase subunit alpha-3 OS=Homo sapiens GN=ATP1A3 PE=1 SV=3        | 0.8444 | -0.01449957  |
| O00629   | IMA4_HUMAN   | Isoform 2 of IMA4 OS=Homo sapiens GN=KPNAA4 PE=1 SV=1                                           | 1      | -0.029146346 |
| P06744-2 | G6PI_HUMAN   | Isoform 2 of Glucose-6-phosphate isomerase OS=Homo sapiens GN=GPI                               | 1      | -0.029146346 |
| P22061-2 | PIMT_HUMAN   | Isoform 2 of Protein-L-isoaspartate(D-aspartate) O-methyltransferase OS=Homo sapiens GN=PCMT1   | 1      | -0.029146346 |
| P61081   | UBC12_HUMAN  | NEDD8-conjugating enzyme Ubc12 OS=Homo sapiens GN=UBE2M PE=1 SV=1                               | 1      | -0.029146346 |
| P61353   | RL27_HUMAN   | 60S ribosomal protein L27 OS=Homo sapiens GN=RPL27 PE=1 SV=2                                    | 1      | -0.029146346 |
| Q14232   | E12BA_HUMAN  | Translation initiation factor eIF-2B subunit alpha OS=Homo sapiens GN=EIF2B1 PE=1 SV=1          | 1      | -0.029146346 |
| Q15436   | SEC23A_HUMAN | Protein transport protein Sec23A OS=Homo sapiens GN=SEC23A PE=1 SV=2                            | 1      | -0.029146346 |
| P12277   | KCRB_HUMAN   | Creatine kinase B-type OS=Homo sapiens GN=CKB PE=1 SV=1                                         | 1      | -0.029146346 |
| P34932   | HSP74_HUMAN  | Heat shock 70 kDa protein 4 OS=Homo sapiens GN=HSPA4 PE=1 SV=4                                  | 1      | -0.029146346 |
| P61086-2 | UBE2K_HUMAN  | Isoform 2 of Ubiquitin-conjugating enzyme E2 K OS=Homo sapiens GN=UBE2K                         | 1      | -0.029146346 |
| Q14103-2 | HNRPD_HUMAN  | Isoform 2 of Heterogeneous nuclear ribonucleoprotein D0 OS=Homo sapiens GN=HNRNPD               | 1      | -0.029146346 |
| Q14157-1 | UBP2L_HUMAN  | Isoform 2 of Ubiquitin-associated protein 2-like OS=Homo sapiens GN=UBAP2L                      | 1      | -0.029146346 |
| Q14974   | IMB1_HUMAN   | Importin subunit beta-1 OS=Homo sapiens GN=KPNB1 PE=1 SV=2                                      | 1      | -0.029146346 |
| Q9Y6E2   | BZW2_HUMAN   | Basic leucine zipper and W2 domain-containing protein 2 OS=Homo sapiens GN=BZW2 PE=1 SV=1       | 1      | -0.029146346 |
| Q401N2-2 | ZACN_HUMAN   | Isoform 2 of Zinc-activated ligand-gated ion channel OS=Homo sapiens GN=ZACN                    | 0.9862 | -0.029146346 |
| Q14966-2 | ZN638_HUMAN  | Isoform 2 of Zinc finger protein 638 OS=Homo sapiens GN=ZNF638                                  | 0.9843 | -0.029146346 |
| Q9GZ21   | NAA50_HUMAN  | N-alpha-acetyltransferase 50 OS=Homo sapiens GN=NAA50 PE=1 SV=1                                 | 0.9749 | -0.029146346 |
| O75347   | TBCA_HUMAN   | Tubulin-specific chaperone A OS=Homo sapiens GN=TBCA PE=1 SV=3                                  | 0.9626 | -0.029146346 |
| H0YJP3   | H0YJP3_HUMAN | Tryptophan-tRNA ligase                                                                          | 0.9573 | -0.029146346 |
| B8ZZB3   | B8ZZB3_HUMAN | Coiled-coil domain-containing protein 141 OS=Homo sapiens GN=CCDC141 PE=4 SV=1                  | 0.9479 | -0.029146346 |
| P35250-2 | RFC2_HUMAN   | Isoform 2 of Replication factor C subunit 2 OS=Homo sapiens GN=RFC2                             | 1      | -0.043943348 |
| P37802   | TAGL2_HUMAN  | Transgelin-2 OS=Homo sapiens GN=TAGLN2 PE=1 SV=3                                                | 1      | -0.043943348 |
| P49458   | SRP09_HUMAN  | Signal recognition particle 9 kDa protein OS=Homo sapiens GN=SRP9 PE=1 SV=2                     | 1      | -0.043943348 |
| P49736   | MCM2_HUMAN   | DNA replication licensing factor MCM2 OS=Homo sapiens GN=MCM2 PE=1 SV=4                         | 1      | -0.043943348 |
| Q02543   | RL18A_HUMAN  | 60S ribosomal protein L18a OS=Homo sapiens GN=RPL18A PE=1 SV=2                                  | 1      | -0.043943348 |
| Q99798   | ACON_HUMAN   | Aconitate hydratase                                                                             | 1      | -0.043943348 |
| Q9HC38-2 | GLOD4_HUMAN  | Isoform 2 of Glyoxalase domain-containing protein 4 OS=Homo sapiens GN=GLOD4                    | 1      | -0.043943348 |
| P04075   | ALDOA_HUMAN  | Fructose-bisphosphate aldolase A OS=Homo sapiens GN=ALDOA PE=1 SV=2                             | 1      | -0.043943348 |
| P40227   | TCMZ_HUMAN   | T-complex protein 1 subunit zeta OS=Homo sapiens GN=CCT6A PE=1 SV=3                             | 1      | -0.043943348 |
| P51532-2 | SMCA4_HUMAN  | Isoform 2 of Transcription activator BRG1 OS=Homo sapiens GN=SMARCA4                            | 1      | -0.043943348 |
| P60891   | PRPS1_HUMAN  | Ribose-phosphate pyrophosphokinase 1 OS=Homo sapiens GN=PRPS1 PE=1 SV=2                         | 1      | -0.043943348 |
| Q16658   | FSCN1_HUMAN  | Fascin OS=Homo sapiens GN=FSCN1 PE=1 SV=3                                                       | 1      | -0.043943348 |
| Q5T2N8   | ATD3C_HUMAN  | ATPase family AAA domain-containing protein 3C OS=Homo sapiens GN=ATAD3C PE=1 SV=2              | 1      | -0.043943348 |
| Q99832   | TCPH_HUMAN   | T-complex protein 1 subunit eta OS=Homo sapiens GN=CCT7 PE=1 SV=2                               | 1      | -0.043943348 |
| Q9UN52   | CSN3_HUMAN   | COP9 signalosome complex subunit 3 OS=Homo sapiens GN=COPS3 PE=1 SV=3                           | 1      | -0.043943348 |
| B4DMU0   | B4DMU0_HUMAN | Pyrroline-5-carboxylate reductase OS=Homo sapiens GN=PYCR1 PE=2 SV=1                            | 1      | -0.043943348 |
| Q9H845   | ACAD9_HUMAN  | Acyl-CoA dehydrogenase family member 9                                                          | 0.9999 | -0.043943348 |
| Q8IZL8-2 | PELP1_HUMAN  | Isoform 2 of Proline-                                                                           | 0.9999 | -0.043943348 |
| O15498   | YKT6_HUMAN   | Synaptobrevin homolog YKT6 OS=Homo sapiens GN=YKT6 PE=1 SV=1                                    | 0.999  | -0.043943348 |

|          |              |                                                                                                    |        |              |
|----------|--------------|----------------------------------------------------------------------------------------------------|--------|--------------|
| Q9BUZ4   | TRAF4_HUMAN  | TNF receptor-associated factor 4 OS=Homo sapiens GN=TRAF4 PE=1 SV=1                                | 0.9963 | -0.043943348 |
| P24043   | LAMA2_HUMAN  | Laminin subunit alpha-2 OS=Homo sapiens GN=LAMA2 PE=1 SV=4                                         | 0.9774 | -0.043943348 |
| Q96CN9   | GCC1_HUMAN   | GRIP and coiled-coil domain-containing protein 1 OS=Homo sapiens GN=GCC1 PE=1 SV=1                 | 0.972  | -0.043943348 |
| Q9Y4F9-2 | FA65B_HUMAN  | Isoform 2 of Protein FAM65B OS=Homo sapiens GN=FA65B                                               | 0.9577 | -0.043943348 |
| P07305-2 | H10_HUMAN    | Isoform 2 of Histone H1.0 OS=Homo sapiens GN=H1F0                                                  | 1      | -0.058893689 |
| P54105   | ICLN_HUMAN   | Methylosome subunit pICln OS=Homo sapiens GN=CLNS1A PE=1 SV=1                                      | 1      | -0.058893689 |
| P62266   | RS23_HUMAN   | 40S ribosomal protein S23 OS=Homo sapiens GN=RP523 PE=1 SV=3                                       | 1      | -0.058893689 |
| Q96CN7   | ISOC1_HUMAN  | Isochorismatase domain-containing protein 1 OS=Homo sapiens GN=ISOC1 PE=1 SV=3                     | 1      | -0.058893689 |
| Q9UKN8   | TF3C4_HUMAN  | General transcription factor 3C polypeptide 4 OS=Homo sapiens GN=TF3C4 PE=1 SV=2                   | 1      | -0.058893689 |
| Q95373   | IPO7_HUMAN   | Importin-7 OS=Homo sapiens GN=IPO7 PE=1 SV=1                                                       | 1      | -0.058893689 |
| P08107   | HSP71_HUMAN  | Heat shock 70 kDa protein 1A/1B OS=Homo sapiens GN=HSPA1A PE=1 SV=5                                | 1      | -0.058893689 |
| P15311   | EZRI_HUMAN   | Ezrin OS=Homo sapiens GN=EZR PE=1 SV=4                                                             | 1      | -0.058893689 |
| P41250   | SYG_HUMAN    | Glycine--tRNA ligase OS=Homo sapiens GN=GARS PE=1 SV=3                                             | 1      | -0.058893689 |
| Q16555   | DPYL2_HUMAN  | Dihydropyrimidinase-related protein 2 OS=Homo sapiens GN=DPYSL2 PE=1 SV=1                          | 1      | -0.058893689 |
| Q8IZT6   | ASPM_HUMAN   | Abnormal spindle-like microcephaly-associated protein OS=Homo sapiens GN=ASPM PE=1 SV=2            | 0.9999 | -0.058893689 |
| Q15631   | TSN_HUMAN    | Translin OS=Homo sapiens GN=TSN PE=1 SV=1                                                          | 0.9996 | -0.058893689 |
| Q5D1E8   | ZC12A_HUMAN  | Ribonuclease ZC3H12A OS=Homo sapiens GN=ZC3H12A PE=1 SV=1                                          | 0.97   | -0.058893689 |
| Q7LBC6   | KDM3B_HUMAN  | Lysine-specific demethylase 3B OS=Homo sapiens GN=KDM3B PE=1 SV=2                                  | 0.9633 | -0.058893689 |
| Q2KJY2   | KIF26B_HUMAN | Kinesin-like protein KIF26B OS=Homo sapiens GN=KIF26B PE=1 SV=1                                    | 0.963  | -0.058893689 |
| Q94842   | TOX4_HUMAN   | TOX high mobility group box family member 4 OS=Homo sapiens GN=TOX4 PE=1 SV=1                      | 0.9476 | -0.058893689 |
| Q95271   | TNKS1_HUMAN  | Tankyrase-1 OS=Homo sapiens GN=TNKS PE=1 SV=2                                                      | 0.9104 | -0.058893689 |
| P06737   | PYGL_HUMAN   | Glycogen phosphorylase                                                                             | 0.837  | -0.058893689 |
| P27797   | CALR_HUMAN   | Calreticulin OS=Homo sapiens GN=CALR PE=1 SV=1                                                     | 1      | -0.074000581 |
| P62318   | SMD3_HUMAN   | Small nuclear ribonucleoprotein Sm D3 OS=Homo sapiens GN=SNRPD3 PE=1 SV=1                          | 1      | -0.074000581 |
| Q15021   | CND1_HUMAN   | Condensin complex subunit 1 OS=Homo sapiens GN=NCAPD2 PE=1 SV=3                                    | 1      | -0.074000581 |
| Q9Y262   | EIF3L_HUMAN  | Eukaryotic translation initiation factor 3 subunit L OS=Homo sapiens GN=EIF3L PE=1 SV=1            | 1      | -0.074000581 |
| Q95831-3 | AIFM1_HUMAN  | Isoform 3 of Apoptosis-inducing factor 1                                                           | 1      | -0.074000581 |
| P05141   | ADT2_HUMAN   | ADP/ATP translocase 2 OS=Homo sapiens GN=SLC25A5 PE=1 SV=7                                         | 1      | -0.074000581 |
| P14678-2 | RSMB_HUMAN   | Isoform SM-B of Small nuclear ribonucleoprotein-associated proteins B and B' OS=Homo sapiens GN=SI | 1      | -0.074000581 |
| P16615-2 | AT2A2_HUMAN  | Isoform 2 of Sarcoplasmic/endoplasmic reticulum calcium ATPase 2 OS=Homo sapiens GN=ATP2A2         | 1      | -0.074000581 |
| P19367-2 | HXK1_HUMAN   | Isoform 2 of Hexokinase-1 OS=Homo sapiens GN=HK1                                                   | 1      | -0.074000581 |
| P27635   | RL10_HUMAN   | 60S ribosomal protein L10 OS=Homo sapiens GN=RPL10 PE=1 SV=4                                       | 1      | -0.074000581 |
| P35613-2 | BASI_HUMAN   | Isoform 2 of Basigin OS=Homo sapiens GN=BSG                                                        | 1      | -0.074000581 |
| P39687   | AN32A_HUMAN  | Acidic leucine-rich nuclear phosphoprotein 32 family member A OS=Homo sapiens GN=ANP32A PE=1 S     | 1      | -0.074000581 |
| P50990   | TCPQ_HUMAN   | T-complex protein 1 subunit theta OS=Homo sapiens GN=CCT8 PE=1 SV=4                                | 1      | -0.074000581 |
| P52701-2 | MSH6_HUMAN   | Isoform GTBP-alt of DNA mismatch repair protein Msh6 OS=Homo sapiens GN=MSH6                       | 1      | -0.074000581 |
| P53396-2 | ACLY_HUMAN   | Isoform 2 of ATP-citrate synthase OS=Homo sapiens GN=ACLY                                          | 1      | -0.074000581 |
| P23284   | PIIB_HUMAN   | Peptidyl-prolyl cis-trans isomerase B OS=Homo sapiens GN=PIIB PE=1 SV=2                            | 1      | -0.074000581 |
| P68371   | TBB4B_HUMAN  | Tubulin beta-4B chain OS=Homo sapiens GN=TUBB4B PE=1 SV=1                                          | 1      | -0.074000581 |
| J3KR44   | J3KR44_HUMAN | Ubiquitin thioesterase OTUB1 OS=Homo sapiens GN=OTUB1 PE=4 SV=1                                    | 1      | -0.074000581 |
| P38919   | IF4A3_HUMAN  | Eukaryotic initiation factor 4A-III OS=Homo sapiens GN=EIF4A3 PE=1 SV=4                            | 1      | -0.074000581 |
| Q00688   | FKBP3_HUMAN  | Peptidyl-prolyl cis-trans isomerase FKBP3 OS=Homo sapiens GN=FKBP3 PE=1 SV=1                       | 0.9997 | -0.074000581 |
| Q9UHD1-2 | CHRD1_HUMAN  | Isoform 2 of Cysteine and histidine-rich domain-containing protein 1 OS=Homo sapiens GN=CHORDC1    | 0.9997 | -0.074000581 |
| Q5T5U3   | RHG21_HUMAN  | Rho GTPase-activating protein 21 OS=Homo sapiens GN=ARHGAP21 PE=1 SV=1                             | 0.9996 | -0.074000581 |
| P12532-2 | KCRU_HUMAN   | Isoform 2 of Creatine kinase U-type                                                                | 0.9993 | -0.074000581 |
| P20929   | NEBU_HUMAN   | Nebulin OS=Homo sapiens GN=NEB PE=1 SV=4                                                           | 0.9991 | -0.074000581 |
| P05496   | AT5G1_HUMAN  | ATP synthase lipid-binding protein                                                                 | 0.9989 | -0.074000581 |
| Q68E01-2 | INT3_HUMAN   | Isoform 2 of Integrator complex subunit 3 OS=Homo sapiens GN=INTS3                                 | 0.9938 | -0.074000581 |
| H3BM57   | H3BM57_HUMAN | Uncharacterized protein (Fragment) OS=Homo sapiens PE=4 SV=1                                       | 0.9905 | -0.074000581 |
| O75607   | NPM3_HUMAN   | Nucleoplasmin-3 OS=Homo sapiens GN=NPM3 PE=1 SV=3                                                  | 1      | -0.089267338 |
| P07737   | PROF1_HUMAN  | Profilin-1 OS=Homo sapiens GN=PFN1 PE=1 SV=2                                                       | 1      | -0.089267338 |
| P20618   | PSB1_HUMAN   | Proteasome subunit beta type-1 OS=Homo sapiens GN=PSMB1 PE=1 SV=2                                  | 1      | -0.089267338 |
| P62241   | RS8_HUMAN    | 40S ribosomal protein S8 OS=Homo sapiens GN=RPS8 PE=1 SV=2                                         | 1      | -0.089267338 |
| P62917   | RL8_HUMAN    | 60S ribosomal protein L8 OS=Homo sapiens GN=RPL8 PE=1 SV=2                                         | 1      | -0.089267338 |
| Q15005   | SPCS2_HUMAN  | Signal peptidase complex subunit 2 OS=Homo sapiens GN=SPCS2 PE=1 SV=3                              | 1      | -0.089267338 |
| Q8NC51-2 | PAIRB_HUMAN  | Isoform 2 of Plasminogen activator inhibitor 1 RNA-binding protein OS=Homo sapiens GN=SERBP1       | 1      | -0.089267338 |
| Q9BVC6   | TM109_HUMAN  | Transmembrane protein 109 OS=Homo sapiens GN=TMEM109 PE=1 SV=1                                     | 1      | -0.089267338 |
| Q9UMS4   | PRP19_HUMAN  | Pre-mRNA-processing factor 19 OS=Homo sapiens GN=PRPF19 PE=1 SV=1                                  | 1      | -0.089267338 |
| P04181   | OAT_HUMAN    | Ornithine aminotransferase                                                                         | 1      | -0.089267338 |
| P18669   | PGAM1_HUMAN  | Phosphoglycerate mutase 1 OS=Homo sapiens GN=PGAM1 PE=1 SV=2                                       | 1      | -0.089267338 |
| P23921   | RIR1_HUMAN   | Ribonucleoside-diphosphate reductase large subunit OS=Homo sapiens GN=RRM1 PE=1 SV=1               | 1      | -0.089267338 |
| P27695   | APEX1_HUMAN  | DNA-(apurinic or pyrimidinic site) lyase OS=Homo sapiens GN=APEX1 PE=1 SV=2                        | 1      | -0.089267338 |
| P29692-2 | EEF1D_HUMAN  | Elongation factor 1-delta OS=Homo sapiens GN=EEF1D                                                 | 1      | -0.089267338 |
| P45880-1 | VDAC2_HUMAN  | Isoform 1 of Voltage-dependent anion-selective channel protein 2 OS=Homo sapiens GN=VDAC2          | 1      | -0.089267338 |
| P47897   | SYQ_HUMAN    | Glutamine--tRNA ligase OS=Homo sapiens GN=QARS PE=1 SV=1                                           | 1      | -0.089267338 |
| P60174-1 | TPIS_HUMAN   | Isoform 2 of Triosephosphate isomerase OS=Homo sapiens GN=TP1                                      | 1      | -0.089267338 |
| P61026   | RAB10_HUMAN  | Ras-related protein Rab-10 OS=Homo sapiens GN=RAB10 PE=1 SV=1                                      | 1      | -0.089267338 |
| Q13162   | PRDX4_HUMAN  | Peroxiredoxin-4 OS=Homo sapiens GN=PRDX4 PE=1 SV=1                                                 | 1      | -0.089267338 |
| O60287   | NPA1P_HUMAN  | Nucleolar pre-ribosomal-associated protein 1 OS=Homo sapiens GN=URB1 PE=1 SV=4                     | 1      | -0.089267338 |
| G3V438   | G3V438_HUMAN | Activator of 90 kDa heat shock protein ATPase homolog 1 (Fragment) OS=Homo sapiens GN=AHSA1 PE     | 1      | -0.089267338 |
| Q5HYJ1   | TECLR_HUMAN  | Trans-2                                                                                            | 0.9982 | -0.089267338 |
| Q98TV4   | TMM43_HUMAN  | Transmembrane protein 43 OS=Homo sapiens GN=TMEM43 PE=1 SV=1                                       | 0.9897 | -0.089267338 |
| Q6AWC2-2 | WWC2_HUMAN   | Isoform 2 of Protein WWC2 OS=Homo sapiens GN=WWC2                                                  | 0.9763 | -0.089267338 |
| P09211   | GSTP1_HUMAN  | Glutathione S-transferase P OS=Homo sapiens GN=GSTP1 PE=1 SV=2                                     | 1      | -0.104697379 |
| P37837   | TALDO_HUMAN  | Transaldolase OS=Homo sapiens GN=TALDO1 PE=1 SV=2                                                  | 1      | -0.104697379 |
| Q99497   | PARK7_HUMAN  | Protein DJ-1 OS=Homo sapiens GN=PARK7 PE=1 SV=2                                                    | 1      | -0.104697379 |
| Q9H0D6-2 | XRN2_HUMAN   | Isoform 2 of 5'-3' exoribonuclease 2 OS=Homo sapiens GN=XRN2                                       | 1      | -0.104697379 |
| P11387   | TOP1_HUMAN   | DNA topoisomerase 1 OS=Homo sapiens GN=TOP1 PE=1 SV=2                                              | 1      | -0.104697379 |
| P26599-2 | PTBP1_HUMAN  | Isoform 2 of Polypyrimidine tract-binding protein 1 OS=Homo sapiens GN=PTBP1                       | 1      | -0.104697379 |
| P26639   | SYTC_HUMAN   | Threonine--tRNA ligase                                                                             | 1      | -0.104697379 |
| P37108   | SRP14_HUMAN  | Signal recognition particle 14 kDa protein OS=Homo sapiens GN=SRP14 PE=1 SV=2                      | 1      | -0.104697379 |
| P40429   | RL13A_HUMAN  | 60S ribosomal protein L13a OS=Homo sapiens GN=RPL13A PE=1 SV=2                                     | 1      | -0.104697379 |
| P46777   | RL5_HUMAN    | 60S ribosomal protein L5 OS=Homo sapiens GN=RPL5 PE=1 SV=3                                         | 1      | -0.104697379 |
| P60660-2 | MYL6_HUMAN   | Isoform Smooth muscle of Myosin light polypeptide 6 OS=Homo sapiens GN=MYL6                        | 1      | -0.104697379 |
| P68402   | PA1B2_HUMAN  | Platelet-activating factor acetylhydrolase IB subunit beta OS=Homo sapiens GN=PFAH1B2 PE=1 SV=1    | 1      | -0.104697379 |
| Q02790   | FKBP4_HUMAN  | Peptidyl-prolyl cis-trans isomerase FKBP4 OS=Homo sapiens GN=FKBP4 PE=1 SV=3                       | 1      | -0.104697379 |
| Q13509   | TBB3_HUMAN   | Tubulin beta-3 chain OS=Homo sapiens GN=TUBB3 PE=1 SV=2                                            | 1      | -0.104697379 |
| Q6P2Q9   | PRP8_HUMAN   | Pre-mRNA-processing-splicing factor 8 OS=Homo sapiens GN=PRPF8 PE=1 SV=2                           | 1      | -0.104697379 |
| Q8N163-2 | K1967_HUMAN  | Isoform 2 of DBIRD complex subunit KIAA1967 OS=Homo sapiens GN=KIAA1967                            | 1      | -0.104697379 |
| Q9H892-2 | TTC12_HUMAN  | Isoform 2 of Tetratricopeptide repeat protein 12 OS=Homo sapiens GN=TTC12                          | 1      | -0.104697379 |
| P53992   | SEC24C_HUMAN | Protein transport protein Sec24C OS=Homo sapiens GN=SEC24C PE=1 SV=3                               | 0.9996 | -0.104697379 |
| Q9NR09   | BIRC6_HUMAN  | Baculoviral IAP repeat-containing protein 6 OS=Homo sapiens GN=BIRC6 PE=1 SV=2                     | 0.9989 | -0.104697379 |

|          |              |                                                                                                  |        |              |
|----------|--------------|--------------------------------------------------------------------------------------------------|--------|--------------|
| P67812   | SC11A_HUMAN  | Signal peptidase complex catalytic subunit SEC11A OS=Homo sapiens GN=SEC11A PE=1 SV=1            | 0.9937 | -0.104697379 |
| Q86Y91-3 | K118B_HUMAN  | Isoform 3 of Kinesin-like protein KIF18B OS=Homo sapiens GN=KIF18B                               | 0.9905 | -0.104697379 |
| O14497-2 | ARI1A_HUMAN  | Isoform 2 of AT-rich interactive domain-containing protein 1A OS=Homo sapiens GN=ARI1A           | 0.9808 | -0.104697379 |
| F222W0   | F222W0_HUMAN | TRIO and F-actin-binding protein OS=Homo sapiens GN=TRIOBP PE=4 SV=1                             | 0.9793 | -0.104697379 |
| O15372   | EIF3H_HUMAN  | Eukaryotic translation initiation factor 3 subunit H OS=Homo sapiens GN=EIF3H PE=1 SV=1          | 1      | -0.120294234 |
| P30048   | PRDX3_HUMAN  | Thioredoxin-dependent peroxide reductase                                                         | 1      | -0.120294234 |
| P42766   | RL35_HUMAN   | 60S ribosomal protein L35 OS=Homo sapiens GN=RPL35 PE=1 SV=2                                     | 1      | -0.120294234 |
| Q8NEJ9-2 | NGDN_HUMAN   | Isoform 2 of Neuroguidin OS=Homo sapiens GN=NGDN                                                 | 1      | -0.120294234 |
| P16949-2 | STMN1_HUMAN  | Isoform 2 of Stathmin OS=Homo sapiens GN=STMN1                                                   | 1      | -0.120294234 |
| P21333-2 | FLNA_HUMAN   | Isoform 2 of Filamin-A OS=Homo sapiens GN=FLNA                                                   | 1      | -0.120294234 |
| P22234   | PUR6_HUMAN   | Multifunctional protein ADE2 OS=Homo sapiens GN=PAICS PE=1 SV=3                                  | 1      | -0.120294234 |
| P46781   | RS9_HUMAN    | 40S ribosomal protein S9 OS=Homo sapiens GN=RPS9 PE=1 SV=3                                       | 1      | -0.120294234 |
| P51148   | RAB5C_HUMAN  | Ras-related protein Rab-5C OS=Homo sapiens GN=RAB5C PE=1 SV=2                                    | 1      | -0.120294234 |
| P61254   | RL26_HUMAN   | 60S ribosomal protein L26 OS=Homo sapiens GN=RPL26 PE=1 SV=1                                     | 1      | -0.120294234 |
| Q15019-2 | SEPT2_HUMAN  | Isoform 2 of Septin-2 OS=Homo sapiens GN=SEPT2                                                   | 1      | -0.120294234 |
| P09429   | HMGB1_HUMAN  | High mobility group protein B1 OS=Homo sapiens GN=HMGB1 PE=1 SV=3                                | 0.9999 | -0.120294234 |
| Q9NR31   | SAR1A_HUMAN  | GTP-binding protein SAR1a OS=Homo sapiens GN=SAR1A PE=1 SV=1                                     | 0.9999 | -0.120294234 |
| Q16630-2 | CPSF6_HUMAN  | Isoform 2 of Cleavage and polyadenylation specificity factor subunit 6 OS=Homo sapiens GN=CPSF6  | 0.9994 | -0.120294234 |
| Q9NXR7-1 | BRE_HUMAN    | Isoform 1 of BRCA1-A complex subunit BRE OS=Homo sapiens GN=BRE                                  | 0.9994 | -0.120294234 |
| P22087   | FBRL_HUMAN   | rRNA 2'-O-methyltransferase fibrillar OS=Homo sapiens GN=FBRL PE=1 SV=2                          | 0.9989 | -0.120294234 |
| Q9C0B2-2 | K1751_HUMAN  | Isoform 2 of Uncharacterized protein KIAA1751 OS=Homo sapiens GN=KIAA1751                        | 0.9981 | -0.120294234 |
| Q969H8   | CS010_HUMAN  | UPF0556 protein C19orf10 OS=Homo sapiens GN=C19orf10 PE=1 SV=1                                   | 0.9957 | -0.120294234 |
| Q15700-2 | DLG2_HUMAN   | Isoform 2 of Disks large homolog 2 OS=Homo sapiens GN=DLG2                                       | 0.9587 | -0.120294234 |
| P42336   | PK3CA_HUMAN  | Phosphatidylinositol 4                                                                           | 0.9522 | -0.120294234 |
| O00487   | PSDE_HUMAN   | 26S proteasome non-ATPase regulatory subunit 14 OS=Homo sapiens GN=PSMD14 PE=1 SV=1              | 1      | -0.13606155  |
| P30084   | ECHM_HUMAN   | Enoyl-CoA hydratase                                                                              | 1      | -0.13606155  |
| P46782   | RS5_HUMAN    | 40S ribosomal protein S5 OS=Homo sapiens GN=RPS5 PE=1 SV=4                                       | 1      | -0.13606155  |
| P61604   | CH10_HUMAN   | 10 kDa heat shock protein                                                                        | 1      | -0.13606155  |
| P62854   | RS26_HUMAN   | 40S ribosomal protein S26 OS=Homo sapiens GN=RPS26 PE=1 SV=3                                     | 1      | -0.13606155  |
| Q9NSD9   | SYFB_HUMAN   | Phenylalanine--tRNA ligase beta subunit OS=Homo sapiens GN=FARSB PE=1 SV=3                       | 1      | -0.13606155  |
| O15067   | PUR4_HUMAN   | Phosphoribosylformylglycinamide synthase OS=Homo sapiens GN=PFAS PE=1 SV=4                       | 1      | -0.13606155  |
| O94905   | ERLN2_HUMAN  | Erlin-2 OS=Homo sapiens GN=ERLN2 PE=1 SV=1                                                       | 1      | -0.13606155  |
| P04843   | RPN1_HUMAN   | Dolichyl-diphosphooligosaccharide--protein glycosyltransferase subunit 1 OS=Homo sapiens GN=RPN1 | 1      | -0.13606155  |
| P17844   | DDX5_HUMAN   | Probable ATP-dependent RNA helicase DDX5 OS=Homo sapiens GN=DDX5 PE=1 SV=1                       | 1      | -0.13606155  |
| P17987   | TCPA_HUMAN   | T-complex protein 1 subunit alpha OS=Homo sapiens GN=TCP1 PE=1 SV=1                              | 1      | -0.13606155  |
| P18124   | RL7_HUMAN    | 60S ribosomal protein L7 OS=Homo sapiens GN=RPL7 PE=1 SV=1                                       | 1      | -0.13606155  |
| P23528   | COF1_HUMAN   | Cofilin-1 OS=Homo sapiens GN=CFL1 PE=1 SV=3                                                      | 1      | -0.13606155  |
| P33176   | KINH_HUMAN   | Kinesin-1 heavy chain OS=Homo sapiens GN=KIF5B PE=1 SV=1                                         | 1      | -0.13606155  |
| P35659   | DEK_HUMAN    | Protein DEK OS=Homo sapiens GN=DEK PE=1 SV=1                                                     | 1      | -0.13606155  |
| P46779   | RL28_HUMAN   | 60S ribosomal protein L28 OS=Homo sapiens GN=RPL28 PE=1 SV=3                                     | 1      | -0.13606155  |
| P50991   | TCPD_HUMAN   | T-complex protein 1 subunit delta OS=Homo sapiens GN=CCT4 PE=1 SV=4                              | 1      | -0.13606155  |
| P53618   | COPB_HUMAN   | Coatomer subunit beta OS=Homo sapiens GN=COPB1 PE=1 SV=3                                         | 1      | -0.13606155  |
| P62701   | RS4X_HUMAN   | 40S ribosomal protein S4                                                                         | 1      | -0.13606155  |
| P62826   | RAN_HUMAN    | GTP-binding nuclear protein Ran OS=Homo sapiens GN=RAN PE=1 SV=3                                 | 1      | -0.13606155  |
| P63261   | ACTG_HUMAN   | Actin                                                                                            | 1      | -0.13606155  |
| Q43432-3 | IF4G3_HUMAN  | Isoform 3 of Eukaryotic translation initiation factor 4 gamma 3 OS=Homo sapiens GN=EIF4G3        | 1      | -0.13606155  |
| Q07021   | C1QBP_HUMAN  | Complement component 1 Q subcomponent-binding protein                                            | 1      | -0.13606155  |
| P14550   | AK1A1_HUMAN  | Alcohol dehydrogenase [NADP(+)] OS=Homo sapiens GN=AKR1A1 PE=1 SV=3                              | 0.9998 | -0.13606155  |
| P09104   | ENOG_HUMAN   | Gamma-enolase OS=Homo sapiens GN=ENO2 PE=1 SV=3                                                  | 0.9997 | -0.13606155  |
| Q96CS3   | FAF2_HUMAN   | FAS-associated factor 2 OS=Homo sapiens GN=FAF2 PE=1 SV=2                                        | 0.9996 | -0.13606155  |
| Q9NXF1-2 | TEX10_HUMAN  | Isoform 2 of Testis-expressed sequence 10 protein OS=Homo sapiens GN=TEX10                       | 0.9967 | -0.13606155  |
| P11137-3 | MAP2_HUMAN   | Isoform 3 of Microtubule-associated protein 2 OS=Homo sapiens GN=MAP2                            | 0.9943 | -0.13606155  |
| Q8NF91-4 | SYNE1_HUMAN  | Isoform 4 of Nesprin-1 OS=Homo sapiens GN=SYNE1                                                  | 0.9936 | -0.13606155  |
| P57721-4 | PCBP3_HUMAN  | Isoform 4 of Poly(rC)-binding protein 3 OS=Homo sapiens GN=PCBP3                                 | 0.9763 | -0.13606155  |
| Q9NYF8-2 | BCLF1_HUMAN  | Isoform 2 of Bcl-2-associated transcription factor 1 OS=Homo sapiens GN=BCLAF1                   | 0.9673 | -0.13606155  |
| Q43242   | PSMD3_HUMAN  | 26S proteasome non-ATPase regulatory subunit 3 OS=Homo sapiens GN=PSMD3 PE=1 SV=2                | 1      | -0.152003093 |
| P13667   | PDIA4_HUMAN  | Protein disulfide-isomerase A4 OS=Homo sapiens GN=PDIA4 PE=1 SV=2                                | 1      | -0.152003093 |
| P30101   | PDIA3_HUMAN  | Protein disulfide-isomerase A3 OS=Homo sapiens GN=PDIA3 PE=1 SV=4                                | 1      | -0.152003093 |
| P39019   | RS19_HUMAN   | 40S ribosomal protein S19 OS=Homo sapiens GN=RPS19 PE=1 SV=2                                     | 1      | -0.152003093 |
| P62841   | RS15_HUMAN   | 40S ribosomal protein S15 OS=Homo sapiens GN=RPS15 PE=1 SV=2                                     | 1      | -0.152003093 |
| Q12905   | ILF2_HUMAN   | Interleukin enhancer-binding factor 2 OS=Homo sapiens GN=ILF2 PE=1 SV=2                          | 1      | -0.152003093 |
| Q9NR30-2 | DDX21_HUMAN  | Isoform 2 of Nucleolar RNA helicase 2 OS=Homo sapiens GN=DDX21                                   | 1      | -0.152003093 |
| P04406   | G3P_HUMAN    | Glyceraldehyde-3-phosphate dehydrogenase OS=Homo sapiens GN=GAPDH PE=1 SV=3                      | 1      | -0.152003093 |
| P12268   | IMDH2_HUMAN  | Inosine-5'-monophosphate dehydrogenase 2 OS=Homo sapiens GN=IMPDH2 PE=1 SV=2                     | 1      | -0.152003093 |
| P13693   | TCTP_HUMAN   | Translationally-controlled tumor protein OS=Homo sapiens GN=TPT1 PE=1 SV=1                       | 1      | -0.152003093 |
| P23526   | SAHH_HUMAN   | Adenosylhomocysteinase OS=Homo sapiens GN=AHCY PE=1 SV=4                                         | 1      | -0.152003093 |
| P25705   | ATPA_HUMAN   | ATP synthase subunit alpha                                                                       | 1      | -0.152003093 |
| P35579   | MYH9_HUMAN   | Myosin-9 OS=Homo sapiens GN=MYH9 PE=1 SV=4                                                       | 1      | -0.152003093 |
| P39023   | RL3_HUMAN    | 60S ribosomal protein L3 OS=Homo sapiens GN=RPL3 PE=1 SV=2                                       | 1      | -0.152003093 |
| P46783   | RS10_HUMAN   | 40S ribosomal protein S10 OS=Homo sapiens GN=RPS10 PE=1 SV=1                                     | 1      | -0.152003093 |
| P62753   | RS6_HUMAN    | 40S ribosomal protein S6 OS=Homo sapiens GN=RPS6 PE=1 SV=1                                       | 1      | -0.152003093 |
| P63220   | RS21_HUMAN   | 40S ribosomal protein S21 OS=Homo sapiens GN=RPS21 PE=1 SV=1                                     | 1      | -0.152003093 |
| Q9GZQ3   | COMD5_HUMAN  | COMM domain-containing protein 5 OS=Homo sapiens GN=COMM5 PE=1 SV=1                              | 1      | -0.152003093 |
| P8VSB5   | F8VSB5_HUMAN | Heterogeneous nuclear ribonucleoprotein A1 OS=Homo sapiens GN=HNRNPA1 PE=4 SV=1                  | 1      | -0.152003093 |
| P30405   | PIIF_HUMAN   | Peptidyl-prolyl cis-trans isomerase F                                                            | 1      | -0.152003093 |
| P46776   | RL27A_HUMAN  | 60S ribosomal protein L27a OS=Homo sapiens GN=RPL27A PE=1 SV=2                                   | 0.9999 | -0.152003093 |
| Q8TD57   | DYH3_HUMAN   | Dynein heavy chain 3                                                                             | 0.9455 | -0.152003093 |
| Q8N1X5   | YF001_HUMAN  | Uncharacterized protein FLJ37310 OS=Homo sapiens PE=1 SV=1                                       | 0.8816 | -0.152003093 |
| P62847-2 | RS24_HUMAN   | Isoform 2 of 40S ribosomal protein S24 OS=Homo sapiens GN=RPS24                                  | 0.8447 | -0.152003093 |
| Q9NX40   | OCAD1_HUMAN  | OCIA domain-containing protein 1 OS=Homo sapiens GN=OCIAD1 PE=1 SV=1                             | 0.8339 | -0.152003093 |
| P62304   | RUXE_HUMAN   | Small nuclear ribonucleoprotein E OS=Homo sapiens GN=SNRPE PE=1 SV=1                             | 1      | -0.168122759 |
| P05388   | RLA0_HUMAN   | 60S acidic ribosomal protein P0 OS=Homo sapiens GN=RPLP0 PE=1 SV=1                               | 1      | -0.168122759 |
| P21796   | VDAC1_HUMAN  | Voltage-dependent anion-selective channel protein 1 OS=Homo sapiens GN=VDAC1 PE=1 SV=2           | 1      | -0.168122759 |
| P25787   | PSA2_HUMAN   | Proteasome subunit alpha type-2 OS=Homo sapiens GN=PSMA2 PE=1 SV=2                               | 1      | -0.168122759 |
| P26583   | HMGB2_HUMAN  | High mobility group protein B2 OS=Homo sapiens GN=HMGB2 PE=1 SV=2                                | 1      | -0.168122759 |
| P35232   | PHB_HUMAN    | Prohibitin OS=Homo sapiens GN=PHB PE=1 SV=1                                                      | 1      | -0.168122759 |
| P48643   | TCPE_HUMAN   | T-complex protein 1 subunit epsilon OS=Homo sapiens GN=CCT5 PE=1 SV=1                            | 1      | -0.168122759 |
| Q05639   | EFT1A2_HUMAN | Elongation factor 1-alpha 2 OS=Homo sapiens GN=EEF1A2 PE=1 SV=1                                  | 1      | -0.168122759 |
| P78371   | TCBP_HUMAN   | T-complex protein 1 subunit beta OS=Homo sapiens GN=CCT2 PE=1 SV=4                               | 1      | -0.168122759 |
| Q07020   | RL18_HUMAN   | 60S ribosomal protein L18 OS=Homo sapiens GN=RPL18 PE=1 SV=2                                     | 1      | -0.168122759 |
| Q99460-2 | PSMD1_HUMAN  | Isoform 2 of 26S proteasome non-ATPase regulatory subunit 1 OS=Homo sapiens GN=PSMD1             | 1      | -0.168122759 |
| Q96TC7-2 | RMD3_HUMAN   | Isoform 2 of Regulator of microtubule dynamics protein 3 OS=Homo sapiens GN=FAM82A2              | 0.9997 | -0.168122759 |

|          |              |                                                                                                   |        |              |
|----------|--------------|---------------------------------------------------------------------------------------------------|--------|--------------|
| P54136-2 | SYRC_HUMAN   | Isoform Monomeric of Arginine--tRNA ligase                                                        | 0.9987 | -0.168122759 |
| P68400   | CSK21_HUMAN  | Casein kinase II subunit alpha OS=Homo sapiens GN=CSNK2A1 PE=1 SV=1                               | 0.9961 | -0.168122759 |
| P17980   | PRS6A_HUMAN  | 26S protease regulatory subunit 6A OS=Homo sapiens GN=PSMC3 PE=1 SV=3                             | 0.9923 | -0.168122759 |
| Q99719-2 | SEPT5_HUMAN  | Isoform 2 of Septin-5 OS=Homo sapiens GN=SEPT5                                                    | 0.9744 | -0.168122759 |
| P22626-2 | ROA2_HUMAN   | Isoform A2 of Heterogeneous nuclear ribonucleoproteins A2/B1 OS=Homo sapiens GN=HNRNPA2B1         | 1      | -0.184424571 |
| P28072   | PSB6_HUMAN   | Proteasome subunit beta type-6 OS=Homo sapiens GN=PSMB6 PE=1 SV=4                                 | 1      | -0.184424571 |
| P31942-2 | HNRH3_HUMAN  | Isoform 2 of Heterogeneous nuclear ribonucleoprotein H3 OS=Homo sapiens GN=HNRNPH3                | 1      | -0.184424571 |
| Q99598   | TSNAX_HUMAN  | Translin-associated protein X OS=Homo sapiens GN=TSNAX PE=1 SV=1                                  | 1      | -0.184424571 |
| P00505   | AATM_HUMAN   | Aspartate aminotransferase                                                                        | 1      | -0.184424571 |
| P08238   | HS90B_HUMAN  | Heat shock protein HSP 90-beta OS=Homo sapiens GN=HSP90A1 PE=1 SV=4                               | 1      | -0.184424571 |
| P08708   | RS17_HUMAN   | 40S ribosomal protein S17 OS=Homo sapiens GN=RPS17 PE=1 SV=2                                      | 1      | -0.184424571 |
| P23396   | RS3_HUMAN    | 40S ribosomal protein S3 OS=Homo sapiens GN=RPS3 PE=1 SV=2                                        | 1      | -0.184424571 |
| P26641   | EF1G_HUMAN   | Elongation factor 1-gamma OS=Homo sapiens GN=EEF1G PE=1 SV=3                                      | 1      | -0.184424571 |
| P30050   | RL12_HUMAN   | 60S ribosomal protein L12 OS=Homo sapiens GN=RPL12 PE=1 SV=1                                      | 1      | -0.184424571 |
| P48735   | IDHP_HUMAN   | Isocitrate dehydrogenase [NADP]                                                                   | 1      | -0.184424571 |
| Q00610-2 | CLH1_HUMAN   | Isoform 2 of Clathrin heavy chain 1 OS=Homo sapiens GN=CLTC                                       | 1      | -0.184424571 |
| Q15003   | CND2_HUMAN   | Condensin complex subunit 2 OS=Homo sapiens GN=NCAHP PE=1 SV=3                                    | 1      | -0.184424571 |
| Q9UNF1   | MAGD2_HUMAN  | Melanoma-associated antigen D2 OS=Homo sapiens GN=MAGED2 PE=1 SV=2                                | 1      | -0.184424571 |
| Q9UNM6-2 | PSD13_HUMAN  | Isoform 2 of 26S proteasome non-ATPase regulatory subunit 13 OS=Homo sapiens GN=PSMD13            | 1      | -0.184424571 |
| P14625   | ENPL_HUMAN   | Endoplasmic reticulum protein OS=Homo sapiens GN=HSP90B1 PE=1 SV=1                                | 1      | -0.184424571 |
| Q13151   | ROA0_HUMAN   | Heterogeneous nuclear ribonucleoprotein A0 OS=Homo sapiens GN=HNRNPA0 PE=1 SV=1                   | 0.9988 | -0.184424571 |
| Q96HR8   | NAF1_HUMAN   | H/ACA ribonucleoprotein complex non-core subunit NAF1 OS=Homo sapiens GN=NAF1 PE=1 SV=2           | 0.997  | -0.184424571 |
| B1AJR9   | B1AJR9_HUMAN | Protein tyrosine phosphatase                                                                      | 0.9842 | -0.184424571 |
| A6NP24   | A6NP24_HUMAN | Quinone oxidoreductase (Fragment) OS=Homo sapiens GN=CRYZ PE=4 SV=1                               | 0.9841 | -0.184424571 |
| Q9Y2W1   | TR150_HUMAN  | Thyroid hormone receptor-associated protein 3 OS=Homo sapiens GN=THRAP3 PE=1 SV=2                 | 0.9827 | -0.184424571 |
| Q01780-2 | EXOSX_HUMAN  | Isoform 2 of Exosome component 10 OS=Homo sapiens GN=EXOSC10                                      | 0.9674 | -0.184424571 |
| P30086   | PEBP1_HUMAN  | Phosphatidylethanolamine-binding protein 1 OS=Homo sapiens GN=PEBP1 PE=1 SV=3                     | 1      | -0.200912694 |
| P50914   | RL14_HUMAN   | 60S ribosomal protein L14 OS=Homo sapiens GN=RPL14 PE=1 SV=4                                      | 1      | -0.200912694 |
| P51570   | GALK1_HUMAN  | Galactokinase OS=Homo sapiens GN=GALK1 PE=1 SV=1                                                  | 1      | -0.200912694 |
| P61221   | ABCE1_HUMAN  | ATP-binding cassette sub-family E member 1 OS=Homo sapiens GN=ABCE1 PE=1 SV=1                     | 1      | -0.200912694 |
| P62913-2 | RL11_HUMAN   | Isoform 2 of 60S ribosomal protein L11 OS=Homo sapiens GN=RPL11                                   | 1      | -0.200912694 |
| Q04837   | SSBP_HUMAN   | Single-stranded DNA-binding protein                                                               | 1      | -0.200912694 |
| O00303   | EIF3F_HUMAN  | Eukaryotic translation initiation factor 3 subunit F OS=Homo sapiens GN=EIF3F PE=1 SV=1           | 1      | -0.200912694 |
| P07195   | LDHB_HUMAN   | L-lactate dehydrogenase B chain OS=Homo sapiens GN=LDHB PE=1 SV=2                                 | 1      | -0.200912694 |
| P33316   | DUT_HUMAN    | Deoxyuridine 5'-triphosphate nucleotidohydrolase                                                  | 1      | -0.200912694 |
| P61224   | RAP1B_HUMAN  | Ras-related protein Rap-1b OS=Homo sapiens GN=RAP1B PE=1 SV=1                                     | 1      | -0.200912694 |
| P68363   | TBA1B_HUMAN  | Tubulin alpha-1B chain OS=Homo sapiens GN=TUBA1B PE=1 SV=1                                        | 1      | -0.200912694 |
| Q15366-2 | PCBP2_HUMAN  | Isoform 2 of Poly(rC)-binding protein 2 OS=Homo sapiens GN=PCBP2                                  | 1      | -0.200912694 |
| Q7KZF4   | SND1_HUMAN   | Staphylococcal nuclease domain-containing protein 1 OS=Homo sapiens GN=SND1 PE=1 SV=1             | 1      | -0.200912694 |
| Q5T9B7   | Q5T9B7_HUMAN | Adenylate kinase F OS=Homo sapiens GN=AK1 PE=2 SV=1                                               | 1      | -0.200912694 |
| P43243   | MATR3_HUMAN  | Matrin-3 OS=Homo sapiens GN=MATR3 PE=1 SV=2                                                       | 1      | -0.200912694 |
| O60684   | IMAT7_HUMAN  | Importin subunit alpha-7 OS=Homo sapiens GN=KPNA6 PE=1 SV=1                                       | 0.9999 | -0.200912694 |
| Q9NX31   | CT111_HUMAN  | Uncharacterized protein C20orf111 OS=Homo sapiens GN=C20orf111 PE=2 SV=2                          | 0.8675 | -0.200912694 |
| P31040   | DHSA_HUMAN   | Succinate dehydrogenase [ubiquinone] flavoprotein subunit                                         | 1      | -0.217591435 |
| P99999   | CYC_HUMAN    | Cytochrome c OS=Homo sapiens GN=CYCS PE=1 SV=2                                                    | 1      | -0.217591435 |
| O14818   | PSA7_HUMAN   | Proteasome subunit alpha type-7 OS=Homo sapiens GN=PSMA7 PE=1 SV=1                                | 1      | -0.217591435 |
| P00558   | PGK1_HUMAN   | Phosphoglycerate kinase 1 OS=Homo sapiens GN=PGK1 PE=1 SV=3                                       | 1      | -0.217591435 |
| P22314   | UBA1_HUMAN   | Ubiquitin-like modifier-activating enzyme 1 OS=Homo sapiens GN=UBA1 PE=1 SV=3                     | 1      | -0.217591435 |
| P40939   | ECHA_HUMAN   | Trifunctional enzyme subunit alpha                                                                | 1      | -0.217591435 |
| P49755   | TMEDA_HUMAN  | Transmembrane emp24 domain-containing protein 10 OS=Homo sapiens GN=TMED10 PE=1 SV=2              | 1      | -0.217591435 |
| Q15233   | NONO_HUMAN   | Non-POU domain-containing octamer-binding protein OS=Homo sapiens GN=NONO PE=1 SV=4               | 1      | -0.217591435 |
| Q99873-2 | ANM1_HUMAN   | Isoform 2 of Protein arginine N-methyltransferase 1 OS=Homo sapiens GN=PRMT1                      | 1      | -0.217591435 |
| Q9H0A0   | NAT10_HUMAN  | N-acetyltransferase 10 OS=Homo sapiens GN=NAT10 PE=1 SV=2                                         | 1      | -0.217591435 |
| Q5VT25-2 | MRCKA_HUMAN  | Isoform 2 of Serine/threonine-protein kinase MRCK alpha OS=Homo sapiens GN=CDC42BPA               | 0.9991 | -0.217591435 |
| O60812   | HNRCL_HUMAN  | Heterogeneous nuclear ribonucleoprotein C-like 1 OS=Homo sapiens GN=HNRNPL1 PE=1 SV=1             | 0.9915 | -0.217591435 |
| A8MVJ3   | A8MVJ3_HUMAN | Uncharacterized protein OS=Homo sapiens PE=4 SV=1                                                 | 0.9796 | -0.217591435 |
| F5H6J7   | F5H6J7_HUMAN | G-protein-coupled receptor 161 OS=Homo sapiens GN=GPR161 PE=4 SV=1                                | 0.9765 | -0.217591435 |
| P31948   | STIP1_HUMAN  | Stress-induced-phosphoprotein 1 OS=Homo sapiens GN=STIP1 PE=1 SV=1                                | 1      | -0.234465254 |
| P42285   | SK2L2_HUMAN  | Superkiller viralicidal activity 2-like 2 OS=Homo sapiens GN=SKIV2L2 PE=1 SV=3                    | 1      | -0.234465254 |
| Q04323-2 | UBXN1_HUMAN  | Isoform 2 of UBX domain-containing protein 1 OS=Homo sapiens GN=UBXN1                             | 1      | -0.234465254 |
| P05023-3 | AT1A1_HUMAN  | Isoform 3 of Sodium/potassium-transporting ATPase subunit alpha-1 OS=Homo sapiens GN=ATP1A1       | 1      | -0.234465254 |
| P11142   | HSP7C_HUMAN  | Heat shock cognate 71 kDa protein OS=Homo sapiens GN=HSPA8 PE=1 SV=1                              | 1      | -0.234465254 |
| P18077   | RL35A_HUMAN  | 60S ribosomal protein L35a OS=Homo sapiens GN=RPL35A PE=1 SV=2                                    | 1      | -0.234465254 |
| P42704   | LPPRC_HUMAN  | Leucine-rich PPR motif-containing protein                                                         | 1      | -0.234465254 |
| P62249   | RS16_HUMAN   | 40S ribosomal protein S16 OS=Homo sapiens GN=RPS16 PE=1 SV=2                                      | 1      | -0.234465254 |
| P62269   | RS18_HUMAN   | 40S ribosomal protein S18 OS=Homo sapiens GN=RPS18 PE=1 SV=3                                      | 1      | -0.234465254 |
| Q13200   | PSMD2_HUMAN  | 26S proteasome non-ATPase regulatory subunit 2 OS=Homo sapiens GN=PSMD2 PE=1 SV=3                 | 1      | -0.234465254 |
| P18621   | RL17_HUMAN   | 60S ribosomal protein L17 OS=Homo sapiens GN=RPL17 PE=1 SV=3                                      | 1      | -0.234465254 |
| P29353-2 | SHC1_HUMAN   | Isoform p52Shc of SHC-transforming protein 1 OS=Homo sapiens GN=SHC1                              | 0.9998 | -0.234465254 |
| Q9UL46   | PSME2_HUMAN  | Proteasome activator complex subunit 2 OS=Homo sapiens GN=PSME2 PE=1 SV=4                         | 0.9993 | -0.234465254 |
| P04818   | TYSY_HUMAN   | Thymidylate synthase OS=Homo sapiens GN=TYMS PE=1 SV=3                                            | 0.9988 | -0.234465254 |
| P25398   | RS12_HUMAN   | 40S ribosomal protein S12 OS=Homo sapiens GN=RPS12 PE=1 SV=3                                      | 1      | -0.251538767 |
| P31930   | QCR1_HUMAN   | Cytochrome b-c1 complex subunit 1                                                                 | 1      | -0.251538767 |
| P52272-2 | HNRPM_HUMAN  | Isoform 2 of Heterogeneous nuclear ribonucleoprotein M OS=Homo sapiens GN=HNRNPM                  | 1      | -0.251538767 |
| O75643   | U520_HUMAN   | U5 small nuclear ribonucleoprotein 200 kDa helicase OS=Homo sapiens GN=SNRNP200 PE=1 SV=2         | 1      | -0.251538767 |
| P23246-2 | SFPQ_HUMAN   | Isoform Short of Splicing factor                                                                  | 1      | -0.251538767 |
| P30153   | 2AAA_HUMAN   | Serine/threonine-protein phosphatase 2A 65 kDa regulatory subunit A alpha isoform OS=Homo sapiens | 1      | -0.251538767 |
| P32119   | PRDX2_HUMAN  | Peroxisome oxidoreductin-2 OS=Homo sapiens GN=PRDX2 PE=1 SV=5                                     | 1      | -0.251538767 |
| P55060-3 | XPO2_HUMAN   | Isoform 3 of Exportin-2 OS=Homo sapiens GN=CSE1L                                                  | 1      | -0.251538767 |
| P55072   | TERA_HUMAN   | Transitional endoplasmic reticulum ATPase OS=Homo sapiens GN=VCP PE=1 SV=4                        | 1      | -0.251538767 |
| P60842   | IF4A1_HUMAN  | Eukaryotic initiation factor 4A-I OS=Homo sapiens GN=EIF4A1 PE=1 SV=1                             | 1      | -0.251538767 |
| P61586   | RHOA_HUMAN   | Transforming protein RhoA OS=Homo sapiens GN=RHOA PE=1 SV=1                                       | 1      | -0.251538767 |
| P84098   | RL19_HUMAN   | 60S ribosomal protein L19 OS=Homo sapiens GN=RPL19 PE=1 SV=1                                      | 1      | -0.251538767 |
| Q07666-2 | KHDR1_HUMAN  | Isoform 2 of KH domain-containing                                                                 | 1      | -0.251538767 |
| Q13347   | EIF3I_HUMAN  | Eukaryotic translation initiation factor 3 subunit I OS=Homo sapiens GN=EIF3I PE=1 SV=1           | 1      | -0.251538767 |
| Q14697-2 | GANAB_HUMAN  | Isoform 2 of Neutral alpha-glucosidase AB OS=Homo sapiens GN=GANAB                                | 1      | -0.251538767 |
| P55957-2 | BID_HUMAN    | Isoform 2 of BH3-interacting domain death agonist OS=Homo sapiens GN=BID                          | 0.9999 | -0.251538767 |
| Q536Q0   | DHB12_HUMAN  | Estradiol 17-beta-dehydrogenase 12 OS=Homo sapiens GN=HSD17B12 PE=1 SV=2                          | 0.9999 | -0.251538767 |
| P14314-2 | GLU2B_HUMAN  | Isoform 2 of Glucosidase 2 subunit beta OS=Homo sapiens GN=PRKCSH                                 | 0.9998 | -0.251538767 |
| P49770   | EI2B8_HUMAN  | Translation initiation factor eIF-2B subunit beta OS=Homo sapiens GN=EIF2B2 PE=1 SV=3             | 0.9998 | -0.251538767 |
| Q13459-2 | MYO9B_HUMAN  | Isoform Short of Unconventional myosin-IXb OS=Homo sapiens GN=MYO9B                               | 0.9974 | -0.251538767 |
| P30085   | KCY_HUMAN    | UMP-CMP kinase OS=Homo sapiens GN=CMK1 PE=1 SV=3                                                  | 0.9873 | -0.251538767 |



|           |              |                                                                                                      |        |              |
|-----------|--------------|------------------------------------------------------------------------------------------------------|--------|--------------|
| Q96A33-2  | CCD47_HUMAN  | Isoform 2 of Coiled-coil domain-containing protein 47 OS=Homo sapiens GN=CCDC47                      | 0.9846 | -0.251538767 |
| Q9NR77    | PXMP2_HUMAN  | Peroxisomal membrane protein 2 OS=Homo sapiens GN=PXMP2 PE=1 SV=3                                    | 0.946  | -0.251538767 |
| Q86Y13    | DZIP3_HUMAN  | E3 ubiquitin-protein ligase DZIP3 OS=Homo sapiens GN=DZIP3 PE=1 SV=2                                 | 0.944  | -0.251538767 |
| O60518    | RNBP6_HUMAN  | Ran-binding protein 6 OS=Homo sapiens GN=RANBP6 PE=1 SV=2                                            | 0.9359 | -0.251538767 |
| Q8IXS8    | F126B_HUMAN  | Protein FAM126B OS=Homo sapiens GN=FAM126B PE=1 SV=1                                                 | 0.9344 | -0.251538767 |
| P24666-2  | PPAC_HUMAN   | Isoform 2 of Low molecular weight phosphotyrosine protein phosphatase OS=Homo sapiens GN=ACP1        | 1      | -0.268816758 |
| P35270    | SPRE_HUMAN   | Septiapterin reductase OS=Homo sapiens GN=SPR PE=1 SV=1                                              | 1      | -0.268816758 |
| P49720    | PSB3_HUMAN   | Proteasome subunit beta type-3 OS=Homo sapiens GN=PSMB3 PE=1 SV=2                                    | 1      | -0.268816758 |
| Q9Y3B4    | PM14_HUMAN   | Pre-mRNA branch site protein p14 OS=Homo sapiens GN=SF3B14 PE=1 SV=1                                 | 1      | -0.268816758 |
| P02786    | TFR1_HUMAN   | Transferrin receptor protein 1 OS=Homo sapiens GN=TFR1 PE=1 SV=2                                     | 1      | -0.268816758 |
| P09455    | RET1_HUMAN   | Retinol-binding protein 1 OS=Homo sapiens GN=RBP1 PE=1 SV=2                                          | 1      | -0.268816758 |
| P11177-2  | ODPB_HUMAN   | Isoform 2 of Pyruvate dehydrogenase E1 component subunit beta                                        | 1      | -0.268816758 |
| P26373    | RL13_HUMAN   | Isoform 2 of 60S ribosomal protein L13 OS=Homo sapiens GN=RPL13 PE=1 SV=4                            | 1      | -0.268816758 |
| P33993    | MCM7_HUMAN   | DNA replication licensing factor MCM7 OS=Homo sapiens GN=MCM7 PE=1 SV=4                              | 1      | -0.268816758 |
| P37268    | FDFT_HUMAN   | Squalene synthase OS=Homo sapiens GN=FDFT1 PE=1 SV=1                                                 | 1      | -0.268816758 |
| P62899-2  | RL31_HUMAN   | Isoform 2 of 60S ribosomal protein L31 OS=Homo sapiens GN=RPL31                                      | 1      | -0.268816758 |
| P62979    | RS27A_HUMAN  | Ubiquitin-40S ribosomal protein S27a OS=Homo sapiens GN=RPS27A PE=1 SV=2                             | 1      | -0.268816758 |
| Q15029-2  | US51_HUMAN   | Isoform 2 of 116 kDa U5 small nuclear ribonucleoprotein component OS=Homo sapiens GN=EFTUD2          | 1      | -0.268816758 |
| Q9UID3-2  | VPS51_HUMAN  | Isoform 2 of Vacuolar protein sorting-associated protein 51 homolog OS=Homo sapiens GN=VPS51         | 1      | -0.268816758 |
| HOY2Z6    | HOY2Z6_HUMAN | Uncharacterized protein OS=Homo sapiens PE=4 SV=1                                                    | 0.9999 | -0.268816758 |
| Q9UHV9    | PFD2_HUMAN   | Prefoldin subunit 2 OS=Homo sapiens GN=PFDN2 PE=1 SV=1                                               | 0.9991 | -0.268816758 |
| P37198    | NUP62_HUMAN  | Nuclear pore glycoprotein p62 OS=Homo sapiens GN=NUP62 PE=1 SV=3                                     | 0.9987 | -0.268816758 |
| Q15652    | JHD2C_HUMAN  | Probable JmjC domain-containing histone demethylation protein 2C OS=Homo sapiens GN=JMJD1C PE=       | 0.9975 | -0.268816758 |
| Q15070-2  | OXA1L_HUMAN  | Isoform 2 of Mitochondrial inner membrane protein OXA1L OS=Homo sapiens GN=OXA1L                     | 0.9855 | -0.268816758 |
| Q00341    | VIGLN_HUMAN  | Vigilin OS=Homo sapiens GN=HDLBP PE=1 SV=2                                                           | 0.9823 | -0.268816758 |
| Q8NVCV1-2 | ADAD2_HUMAN  | Isoform 2 of Adenosine deaminase domain-containing protein 2 OS=Homo sapiens GN=ADAD2                | 0.9754 | -0.268816758 |
| P30154-2  | 2AAB_HUMAN   | Isoform 2 of Serine/threonine-protein phosphatase 2A 65 kDa regulatory subunit A beta isoform OS=Ho  | 0.9508 | -0.268816758 |
| O43684-2  | BUB3_HUMAN   | Isoform 2 of Mitotic checkpoint protein BUB3 OS=Homo sapiens GN=BUB3                                 | 1      | -0.286304185 |
| O75608-2  | LYPA1_HUMAN  | Isoform 2 of Acyl-protein thioesterase 1 OS=Homo sapiens GN=LYPA1                                    | 1      | -0.286304185 |
| O75694-2  | NU155_HUMAN  | Isoform 2 of Nuclear pore complex protein Nup155 OS=Homo sapiens GN=NUP155                           | 1      | -0.286304185 |
| P08397-2  | HEM3_HUMAN   | Isoform 2 of Porphobilinogen deaminase OS=Homo sapiens GN=HMBS                                       | 1      | -0.286304185 |
| P14174    | MIF_HUMAN    | Macrophage migration inhibitory factor OS=Homo sapiens GN=MIF PE=1 SV=4                              | 1      | -0.286304185 |
| P36542-2  | ATPG_HUMAN   | Isoform Heart of ATP synthase subunit gamma                                                          | 1      | -0.286304185 |
| P49721    | PSB2_HUMAN   | Proteasome subunit beta type-2 OS=Homo sapiens GN=PSMB2 PE=1 SV=1                                    | 1      | -0.286304185 |
| Q9NTK5-3  | OLA1_HUMAN   | Isoform 3 of Obg-like ATPase 1 OS=Homo sapiens GN=OLA1                                               | 1      | -0.286304185 |
| O75533    | SF3B1_HUMAN  | Splicing factor 3B subunit 1 OS=Homo sapiens GN=SF3B1 PE=1 SV=3                                      | 1      | -0.286304185 |
| P04844-2  | RPN2_HUMAN   | Isoform 2 of Dolichyl-diphosphooligosaccharide--protein glycosyltransferase subunit 2 OS=Homo sapien | 1      | -0.286304185 |
| P18206-2  | VINC_HUMAN   | Isoform 1 of Vinculin OS=Homo sapiens GN=VCL                                                         | 1      | -0.286304185 |
| Q92598-2  | HS105_HUMAN  | Isoform Beta of Heat shock protein 105 kDa OS=Homo sapiens GN=HSPH1                                  | 1      | -0.286304185 |
| P40926    | MDHM_HUMAN   | Malate dehydrogenase                                                                                 | 1      | -0.286304185 |
| P52209    | 6PGD_HUMAN   | 6-phosphogluconate dehydrogenase                                                                     | 1      | -0.286304185 |
| P60228    | EIF3E_HUMAN  | Eukaryotic translation initiation factor 3 subunit E OS=Homo sapiens GN=EIF3E PE=1 SV=1              | 1      | -0.286304185 |
| P61289-2  | PSME3_HUMAN  | Isoform 2 of Proteasome activator complex subunit 3 OS=Homo sapiens GN=PSME3                         | 1      | -0.286304185 |
| P62633-2  | CNBP_HUMAN   | Isoform 2 of Cellular nucleic acid-binding protein OS=Homo sapiens GN=CNBP                           | 1      | -0.286304185 |
| P62714    | PPP2AB_HUMAN | Serine/threonine-protein phosphatase 2A catalytic subunit beta isoform OS=Homo sapiens GN=PPP2CB     | 1      | -0.286304185 |
| Q04637-3  | IF4G1_HUMAN  | Isoform B of Eukaryotic translation initiation factor 4 gamma 1 OS=Homo sapiens GN=EIF4G1            | 1      | -0.286304185 |
| Q12789-3  | TF3C1_HUMAN  | Isoform 2 of General transcription factor 3C polypeptide 1 OS=Homo sapiens GN=GTF3C1                 | 1      | -0.286304185 |
| Q14839-2  | CHD4_HUMAN   | Isoform 2 of Chromodomain-helicase-DNA-binding protein 4 OS=Homo sapiens GN=CHD4                     | 1      | -0.286304185 |
| Q16891-2  | IMMT_HUMAN   | Isoform 2 of Mitochondrial inner membrane protein OS=Homo sapiens GN=IMMT                            | 1      | -0.286304185 |
| Q9Y265    | RUVB1_HUMAN  | RuvB-like 1 OS=Homo sapiens GN=RUVB1 PE=1 SV=1                                                       | 1      | -0.286304185 |
| P40394-2  | ADH7_HUMAN   | Isoform 2 of Alcohol dehydrogenase class 4 mu/sigma chain OS=Homo sapiens GN=ADH7                    | 0.9954 | -0.286304185 |
| O00625    | PIR_HUMAN    | Pirin OS=Homo sapiens GN=PIR PE=1 SV=1                                                               | 1      | -0.304006187 |
| O43765    | SGTA_HUMAN   | Small glutamine-rich tetratricopeptide repeat-containing protein alpha OS=Homo sapiens GN=SGTA PE=   | 1      | -0.304006187 |
| P12004    | PCNA_HUMAN   | Proliferating cell nuclear antigen OS=Homo sapiens GN=PCNA PE=1 SV=1                                 | 1      | -0.304006187 |
| P30041    | PRDX6_HUMAN  | Peroxiredoxin-6 OS=Homo sapiens GN=PRDX6 PE=1 SV=3                                                   | 1      | -0.304006187 |
| Q9UPA5    | BSN_HUMAN    | Protein bassoon OS=Homo sapiens GN=BSN PE=1 SV=4                                                     | 1      | -0.304006187 |
| P06576    | ATPB_HUMAN   | ATP synthase subunit beta                                                                            | 1      | -0.304006187 |
| P06748    | NPM_HUMAN    | Nucleophosmin OS=Homo sapiens GN=NPM1 PE=1 SV=2                                                      | 1      | -0.304006187 |
| P62879    | GBB2_HUMAN   | Guanine nucleotide-binding protein G(I)/G(S)/G(T) subunit beta-2 OS=Homo sapiens GN=GNB2 PE=1 SV     | 1      | -0.304006187 |
| C9JD32    | C9JD32_HUMAN | 60S ribosomal protein L23 (Fragment) OS=Homo sapiens GN=RPL23 PE=3 SV=1                              | 1      | -0.304006187 |
| P61006    | RAB8A_HUMAN  | Ras-related protein Rab-8A OS=Homo sapiens GN=RAB8A PE=1 SV=1                                        | 0.9999 | -0.304006187 |
| P54819-2  | KAD2_HUMAN   | Isoform 2 of Adenylate kinase 2                                                                      | 0.9999 | -0.304006187 |
| Q8IWX7-2  | UNC45B_HUMAN | Isoform 2 of Protein unc-45 homolog B OS=Homo sapiens GN=UNC45B                                      | 0.9996 | -0.304006187 |
| Q9P258    | RCC2_HUMAN   | Protein RCC2 OS=Homo sapiens GN=RCC2 PE=1 SV=2                                                       | 0.9976 | -0.304006187 |
| Q09472    | EP300_HUMAN  | Histone acetyltransferase p300 OS=Homo sapiens GN=EP300 PE=1 SV=2                                    | 0.9936 | -0.304006187 |
| Q8N7X0    | ADGB_HUMAN   | Androglobin OS=Homo sapiens GN=ADGB PE=2 SV=3                                                        | 0.8681 | -0.304006187 |
| O76003    | GLRX3_HUMAN  | Glutaredoxin-3 OS=Homo sapiens GN=GLRX3 PE=1 SV=2                                                    | 1      | -0.321928095 |
| P54886-2  | P5CS_HUMAN   | Isoform Short of Delta-1-pyrroline-5-carboxylate synthase OS=Homo sapiens GN=ALDH18A1                | 1      | -0.321928095 |
| P08865    | RSSA_HUMAN   | 40S ribosomal protein SA OS=Homo sapiens GN=RPSA PE=1 SV=4                                           | 1      | -0.321928095 |
| P11586    | C1TC_HUMAN   | C-1-tetrahydrofolate synthase                                                                        | 1      | -0.321928095 |
| P47755    | CAZA2_HUMAN  | F-actin-capping protein subunit alpha-2 OS=Homo sapiens GN=CAPZA2 PE=1 SV=3                          | 1      | -0.321928095 |
| P84103    | SRSF3_HUMAN  | Serine/arginine-rich splicing factor 3 OS=Homo sapiens GN=SRSF3 PE=1 SV=1                            | 1      | -0.321928095 |
| Q7L2H7    | EIF3M_HUMAN  | Eukaryotic translation initiation factor 3 subunit M OS=Homo sapiens GN=EIF3M PE=1 SV=1              | 1      | -0.321928095 |
| Q86VP6    | CAND1_HUMAN  | Cullin-associated NEDD8-dissociated protein 1 OS=Homo sapiens GN=CAND1 PE=1 SV=2                     | 1      | -0.321928095 |
| Q8TEX9-2  | IPO4_HUMAN   | Isoform 2 of Importin-4 OS=Homo sapiens GN=IPO4                                                      | 1      | -0.321928095 |
| O14880    | MGST3_HUMAN  | Microsomal glutathione S-transferase 3 OS=Homo sapiens GN=MGST3 PE=1 SV=1                            | 0.9999 | -0.321928095 |
| P11216    | PYGB_HUMAN   | Glycogen phosphorylase                                                                               | 0.993  | -0.321928095 |
| P62851    | RS25_HUMAN   | 40S ribosomal protein S25 OS=Homo sapiens GN=RPS25 PE=1 SV=1                                         | 0.9886 | -0.321928095 |
| P82933    | RT09_HUMAN   | 28S ribosomal protein S9                                                                             | 0.9807 | -0.321928095 |
| Q9GZM5    | YIPF3_HUMAN  | Protein YIPF3 OS=Homo sapiens GN=YIPF3 PE=1 SV=1                                                     | 0.8784 | -0.321928095 |
| A6NHG4    | DDTL_HUMAN   | D-dopachrome decarboxylase-like protein OS=Homo sapiens GN=DDTL PE=2 SV=1                            | 1      | -0.340075442 |
| Q96QK1    | VPS35_HUMAN  | Vacuolar protein sorting-associated protein 35 OS=Homo sapiens GN=VPS35 PE=1 SV=2                    | 1      | -0.340075442 |
| Q08211    | DHX9_HUMAN   | ATP-dependent RNA helicase A OS=Homo sapiens GN=DHX9 PE=1 SV=4                                       | 1      | -0.340075442 |
| P27708    | PYR1_HUMAN   | CAD protein OS=Homo sapiens GN=CAD PE=1 SV=3                                                         | 1      | -0.340075442 |
| P31943    | HNRH1_HUMAN  | Heterogeneous nuclear ribonucleoprotein H OS=Homo sapiens GN=HNRNPH1 PE=1 SV=4                       | 1      | -0.340075442 |
| P62937    | PPIA_HUMAN   | Peptidyl-prolyl cis-trans isomerase A OS=Homo sapiens GN=PPIA PE=1 SV=2                              | 1      | -0.340075442 |
| P68366    | TBA4A_HUMAN  | Tubulin alpha-4A chain OS=Homo sapiens GN=TUBA4A PE=1 SV=1                                           | 1      | -0.340075442 |
| Q00839-2  | HNRPU_HUMAN  | Isoform Short of Heterogeneous nuclear ribonucleoprotein U OS=Homo sapiens GN=HNRNPU                 | 1      | -0.340075442 |
| Q02878    | RL6_HUMAN    | 60S ribosomal protein L6 OS=Homo sapiens GN=RPL6 PE=1 SV=3                                           | 1      | -0.340075442 |
| Q10567-2  | AP1B1_HUMAN  | Isoform B of AP-1 complex subunit beta-1 OS=Homo sapiens GN=AP1B1                                    | 1      | -0.340075442 |
| Q9NZ18    | IF2B1_HUMAN  | Insulin-like growth factor 2 mRNA-binding protein 1 OS=Homo sapiens GN=IGF2BP1 PE=1 SV=2             | 1      | -0.340075442 |
| P52788-2  | SPSY_HUMAN   | Isoform 2 of Spermine synthase OS=Homo sapiens GN=SMS                                                | 0.9999 | -0.340075442 |

|          |              |                                                                                                    |        |              |
|----------|--------------|----------------------------------------------------------------------------------------------------|--------|--------------|
| C9JQ55   | C9JQ55_HUMAN | Protein RPS4XP21 OS=Homo sapiens GN=RPS4XP21 PE=4 SV=1                                             | 0.9993 | -0.340075442 |
| P49756-2 | RBM25_HUMAN  | Isoform 2 of RNA-binding protein 25 OS=Homo sapiens GN=RBM25                                       | 0.9986 | -0.340075442 |
| Q9B2M5   | N2DL2_HUMAN  | NKG2D ligand 2 OS=Homo sapiens GN=ULBP2 PE=1 SV=1                                                  | 0.9924 | -0.340075442 |
| P61923   | COPZ1_HUMAN  | Coatomer subunit zeta-1 OS=Homo sapiens GN=COPZ1 PE=1 SV=1                                         | 1      | -0.358453971 |
| Q15084-2 | PDIA6_HUMAN  | Isoform 2 of Protein disulfide-isomerase A6 OS=Homo sapiens GN=PDIA6                               | 1      | -0.358453971 |
| O00571-2 | DDX3X_HUMAN  | Isoform 2 of ATP-dependent RNA helicase DDX3X OS=Homo sapiens GN=DDX3X                             | 1      | -0.358453971 |
| P10809   | CH60_HUMAN   | 60 kDa heat shock protein                                                                          | 1      | -0.358453971 |
| P12956   | XRCC6_HUMAN  | X-ray repair cross-complementing protein 6 OS=Homo sapiens GN=XRCC6 PE=1 SV=2                      | 1      | -0.358453971 |
| P13639   | EEF2_HUMAN   | Elongation factor 2 OS=Homo sapiens GN=EEF2 PE=1 SV=4                                              | 1      | -0.358453971 |
| P62491   | RB11A_HUMAN  | Ras-related protein Rab-11A OS=Homo sapiens GN=RB11A PE=1 SV=3                                     | 1      | -0.358453971 |
| Q16531   | DDB1_HUMAN   | DNA damage-binding protein 1 OS=Homo sapiens GN=DDB1 PE=1 SV=1                                     | 1      | -0.358453971 |
| Q9NX63   | CHCH3_HUMAN  | Coiled-coil-helix-coiled-coil-helix domain-containing protein 3                                    | 1      | -0.358453971 |
| Q9UBE0   | SAE1_HUMAN   | SUMO-activating enzyme subunit 1 OS=Homo sapiens GN=SAE1 PE=1 SV=1                                 | 1      | -0.358453971 |
| Q9Y6C9   | MTCH2_HUMAN  | Mitochondrial carrier homolog 2 OS=Homo sapiens GN=MTCH2 PE=1 SV=1                                 | 1      | -0.358453971 |
| O95336   | 6PGL_HUMAN   | 6-phosphogluconolactonase OS=Homo sapiens GN=6PGL PE=1 SV=2                                        | 0.9987 | -0.358453971 |
| J3QQT0   | J3QQT0_HUMAN | Protein-methionine sulfoxide oxidase MICAL3 (Fragment) OS=Homo sapiens GN=MICAL3 PE=4 SV=1         | 0.9975 | -0.358453971 |
| O75417-2 | DPOLQ_HUMAN  | Isoform 2 of DNA polymerase theta OS=Homo sapiens GN=POLQ                                          | 0.9915 | -0.358453971 |
| O60341-2 | KDM1A_HUMAN  | Isoform 2 of Lysine-specific histone demethylase 1A OS=Homo sapiens GN=KDM1A                       | 0.9891 | -0.358453971 |
| Q00154-2 | BACH_HUMAN   | Isoform 2 of Cytosolic acyl coenzyme A thioester hydrolase OS=Homo sapiens GN=ACOT7                | 0.9601 | -0.358453971 |
| Q9B2H6   | WDR11_HUMAN  | WD repeat-containing protein 11 OS=Homo sapiens GN=WDR11 PE=1 SV=1                                 | 0.958  | -0.358453971 |
| P23368-2 | MAOM_HUMAN   | Isoform 2 of NAD-dependent malic enzyme                                                            | 1      | -0.377069649 |
| Q9UBQ0-2 | VPS29_HUMAN  | Isoform 2 of Vacuolar protein sorting-associated protein 29 OS=Homo sapiens GN=VPS29               | 1      | -0.377069649 |
| P24534   | EEF1B_HUMAN  | Elongation factor 1-beta OS=Homo sapiens GN=EEF1B2 PE=1 SV=3                                       | 1      | -0.377069649 |
| P36776   | LONM_HUMAN   | Lon protease homolog                                                                               | 1      | -0.377069649 |
| P38646   | GRP75_HUMAN  | Stress-70 protein                                                                                  | 1      | -0.377069649 |
| P49411   | EFTU_HUMAN   | Elongation factor Tu                                                                               | 1      | -0.377069649 |
| P62081   | RS7_HUMAN    | 40S ribosomal protein S7 OS=Homo sapiens GN=RPS7 PE=1 SV=1                                         | 1      | -0.377069649 |
| Q15417   | CNN3_HUMAN   | Calponin-3 OS=Homo sapiens GN=CNN3 PE=1 SV=1                                                       | 1      | -0.377069649 |
| Q8NCW5   | NNRE_HUMAN   | NAD(P)H-hydrate epimerase OS=Homo sapiens GN=APOA1B1P PE=1 SV=2                                    | 1      | -0.377069649 |
| P57678   | GEM14_HUMAN  | Gem-associated protein 4 OS=Homo sapiens GN=GEMIN4 PE=1 SV=2                                       | 0.9999 | -0.377069649 |
| Q9Y606-2 | TRUA_HUMAN   | Isoform 2 of tRNA pseudouridine synthase A                                                         | 0.9961 | -0.377069649 |
| Q8TDW7-2 | FAT3_HUMAN   | Isoform 2 of Protocadherin Fat 3 OS=Homo sapiens GN=FAT3                                           | 0.9804 | -0.377069649 |
| Q13576-2 | IQGA2_HUMAN  | Isoform 2 of Ras GTPase-activating-like protein IQGAP2 OS=Homo sapiens GN=IQGAP2                   | 0.9742 | -0.377069649 |
| Q9H0M0-2 | WWP1_HUMAN   | Isoform 2 of NEDD4-like E3 ubiquitin-protein ligase WWP1 OS=Homo sapiens GN=WWP1                   | 0.9328 | -0.377069649 |
| Q6UB35   | C1TM_HUMAN   | Monofunctional C1-tetrahydrofolate synthase                                                        | 0.891  | -0.377069649 |
| P07339   | CATD_HUMAN   | Cathepsin D OS=Homo sapiens GN=CTSD PE=1 SV=1                                                      | 1      | -0.395928676 |
| P09884   | DPOLA_HUMAN  | DNA polymerase alpha catalytic subunit OS=Homo sapiens GN=POLA1 PE=1 SV=2                          | 1      | -0.395928676 |
| Q16836-2 | HCDH_HUMAN   | Isoform 2 of Hydroxyacyl-coenzyme A dehydrogenase                                                  | 1      | -0.395928676 |
| P05387   | RLA2_HUMAN   | 60S acidic ribosomal protein P2 OS=Homo sapiens GN=RPLP2 PE=1 SV=1                                 | 1      | -0.395928676 |
| P31939   | PUR9_HUMAN   | Bifunctional purine biosynthesis protein PURH OS=Homo sapiens GN=ATIC PE=1 SV=3                    | 1      | -0.395928676 |
| P51571   | SSRD_HUMAN   | Translocan-associated protein subunit delta OS=Homo sapiens GN=SSR4 PE=1 SV=1                      | 1      | -0.395928676 |
| P68104   | EF1A1_HUMAN  | Elongation factor 1-alpha 1 OS=Homo sapiens GN=EF1A1 PE=1 SV=1                                     | 1      | -0.395928676 |
| Q01130   | SRSF2_HUMAN  | Serine/arginine-rich splicing factor 2 OS=Homo sapiens GN=SRSF2 PE=1 SV=4                          | 1      | -0.395928676 |
| O43795-2 | MYO1B_HUMAN  | Isoform 2 of Unconventional myosin-Ib OS=Homo sapiens GN=MYO1B                                     | 0.9999 | -0.395928676 |
| Q8TB22-2 | SPT20_HUMAN  | Isoform 2 of Spermatogenesis-associated protein 20 OS=Homo sapiens GN=SPATA20                      | 0.9979 | -0.395928676 |
| O60841   | IF2P_HUMAN   | Eukaryotic translation initiation factor 5B OS=Homo sapiens GN=EIF5B PE=1 SV=4                     | 0.9953 | -0.395928676 |
| O43823   | AKAP8_HUMAN  | A-kinase anchor protein 8 OS=Homo sapiens GN=AKAP8 PE=1 SV=1                                       | 0.9919 | -0.395928676 |
| O14782   | KIF3C_HUMAN  | Kinesin-like protein KIF3C OS=Homo sapiens GN=KIF3C PE=1 SV=3                                      | 0.98   | -0.395928676 |
| Q00534   | CDK6_HUMAN   | Cyclin-dependent kinase 6 OS=Homo sapiens GN=CDK6 PE=1 SV=1                                        | 0.9795 | -0.395928676 |
| B0UXE9   | B0UXE9_HUMAN | Collagen alpha-2(XI) chain OS=Homo sapiens GN=COL11A2 PE=4 SV=1                                    | 0.9574 | -0.395928676 |
| P56134-2 | ATPK_HUMAN   | Isoform 2 of ATP synthase subunit f                                                                | 1      | -0.415037499 |
| P07741   | APT_HUMAN    | Adenine phosphoribosyltransferase OS=Homo sapiens GN=APRT PE=1 SV=2                                | 1      | -0.415037499 |
| Q9BUJ2-2 | HNRL1_HUMAN  | Isoform 2 of Heterogeneous nuclear ribonucleoprotein U-like protein 1 OS=Homo sapiens GN=HNRNPU    | 1      | -0.415037499 |
| Q9UBQ5   | EIF3K_HUMAN  | Eukaryotic translation initiation factor 3 subunit K OS=Homo sapiens GN=EIF3K PE=1 SV=1            | 1      | -0.415037499 |
| Q9Y4L1   | HYOU1_HUMAN  | Hypoxia up-regulated protein 1 OS=Homo sapiens GN=HYOU1 PE=1 SV=1                                  | 1      | -0.415037499 |
| E9PAV3   | E9PAV3_HUMAN | Nascent polypeptide-associated complex subunit alpha OS=Homo sapiens GN=NACA PE=4 SV=1             | 1      | -0.415037499 |
| P11021   | GRP78_HUMAN  | 78 kDa glucose-regulated protein OS=Homo sapiens GN=HSPA5 PE=1 SV=2                                | 1      | -0.415037499 |
| P62888   | RL30_HUMAN   | 60S ribosomal protein L30 OS=Homo sapiens GN=RPL30 PE=1 SV=2                                       | 1      | -0.415037499 |
| G3V2X9   | G3V2X9_HUMAN | Alpha-actinin-1 (Fragment) OS=Homo sapiens GN=ACTN1 PE=4 SV=1                                      | 0.9997 | -0.415037499 |
| P31689   | DNJA1_HUMAN  | DnaJ homolog subfamily A member 1 OS=Homo sapiens GN=DNJA1 PE=1 SV=2                               | 0.9925 | -0.415037499 |
| Q9B2K3   | NACP1_HUMAN  | Putative nascent polypeptide-associated complex subunit alpha-like protein OS=Homo sapiens GN=NACP | 0.9916 | -0.415037499 |
| O14686-3 | MLL2_HUMAN   | Isoform 3 of Histone-lysine N-methyltransferase MLL2 OS=Homo sapiens GN=MLL2                       | 0.9891 | -0.415037499 |
| Q13283   | G3BP1_HUMAN  | Ras GTPase-activating protein-binding protein 1 OS=Homo sapiens GN=G3BP1 PE=1 SV=1                 | 0.9186 | -0.415037499 |
| Q92667-2 | AKAP1_HUMAN  | Isoform 2 of A-kinase anchor protein 1                                                             | 0.916  | -0.415037499 |
| O43399-2 | TPD54_HUMAN  | Isoform 2 of Tumor protein D54 OS=Homo sapiens GN=TPD52L2                                          | 1      | -0.434402824 |
| P23258   | TBG1_HUMAN   | Tubulin gamma-1 chain OS=Homo sapiens GN=TUBG1 PE=1 SV=2                                           | 1      | -0.434402824 |
| P55157   | MTP_HUMAN    | Microsomal triglyceride transfer protein large subunit OS=Homo sapiens GN=MTPP PE=1 SV=1           | 1      | -0.434402824 |
| Q9BQ67   | GRWD1_HUMAN  | Glutamate-rich WD repeat-containing protein 1 OS=Homo sapiens GN=GRWD1 PE=1 SV=1                   | 1      | -0.434402824 |
| Q9Y295   | DRG1_HUMAN   | Developmentally-regulated GTP-binding protein 1 OS=Homo sapiens GN=DRG1 PE=1 SV=1                  | 1      | -0.434402824 |
| P46060   | RAGP1_HUMAN  | Ran GTPase-activating protein 1 OS=Homo sapiens GN=RANGAP1 PE=1 SV=1                               | 1      | -0.434402824 |
| P49773   | HINT1_HUMAN  | Histidine triad nucleotide-binding protein 1 OS=Homo sapiens GN=HINT1 PE=1 SV=2                    | 1      | -0.434402824 |
| P51149   | RAB7A_HUMAN  | Ras-related protein Rab-7a OS=Homo sapiens GN=RAB7A PE=1 SV=1                                      | 1      | -0.434402824 |
| P53621   | COPA_HUMAN   | Coatomer subunit alpha OS=Homo sapiens GN=COPA PE=1 SV=2                                           | 1      | -0.434402824 |
| P55209   | NP1L1_HUMAN  | Nucleosome assembly protein 1-like 1 OS=Homo sapiens GN=NP1L1 PE=1 SV=1                            | 1      | -0.434402824 |
| P56192   | SYMC_HUMAN   | Methionine--tRNA ligase                                                                            | 1      | -0.434402824 |
| Q92616   | GCN1L_HUMAN  | Translational activator GCN1 OS=Homo sapiens GN=GCN1L1 PE=1 SV=6                                   | 1      | -0.434402824 |
| Q9Y678   | COPG1_HUMAN  | Coatomer subunit gamma-1 OS=Homo sapiens GN=COPG1 PE=1 SV=1                                        | 1      | -0.434402824 |
| Q53G59   | SNUT2_HUMAN  | U4/U6.U5 tri-snRNP-associated protein 2 OS=Homo sapiens GN=USP39 PE=1 SV=2                         | 0.9959 | -0.434402824 |
| Q9H2M9   | RBGPR_HUMAN  | Rab3 GTPase-activating protein non-catalytic subunit OS=Homo sapiens GN=RAB3GAP2 PE=1 SV=1         | 0.9868 | -0.434402824 |
| P11532-2 | DMD_HUMAN    | Isoform 1 of Dystrophin OS=Homo sapiens GN=DMD                                                     | 0.954  | -0.434402824 |
| Q96737-2 | RBM15_HUMAN  | Isoform 2 of Putative RNA-binding protein 15 OS=Homo sapiens GN=RBM15                              | 0.9082 | -0.434402824 |
| Q9B5J8-2 | ESYT1_HUMAN  | Isoform 2 of Extended synaptotagmin-1 OS=Homo sapiens GN=ESYT1                                     | 1      | -0.454031631 |
| Q9N569   | TOM22_HUMAN  | Mitochondrial import receptor subunit TOM22 homolog OS=Homo sapiens GN=TOMM22 PE=1 SV=3            | 1      | -0.454031631 |
| P39656   | OST48_HUMAN  | Dolichyl-diphosphooligosaccharide--protein glycosyltransferase 48 kDa subunit OS=Homo sapiens GN=L | 1      | -0.454031631 |
| P48047   | ATPO_HUMAN   | ATP synthase subunit O                                                                             | 1      | -0.454031631 |
| P61970   | NTF2_HUMAN   | Nuclear transport factor 2 OS=Homo sapiens GN=NUTF2 PE=1 SV=1                                      | 1      | -0.454031631 |
| P62277   | RS13_HUMAN   | 40S ribosomal protein S13 OS=Homo sapiens GN=RPS13 PE=1 SV=2                                       | 1      | -0.454031631 |
| Q9H984   | SFXN1_HUMAN  | Sideroflexin-1 OS=Homo sapiens GN=SFXN1 PE=1 SV=4                                                  | 1      | -0.454031631 |
| P52292   | IMA2_HUMAN   | Importin subunit alpha-2 OS=Homo sapiens GN=KPNA2 PE=1 SV=1                                        | 1      | -0.473931188 |
| Q14978-2 | NOLC1_HUMAN  | Isoform Beta of Nucleolar and coiled-body phosphoprotein 1 OS=Homo sapiens GN=NOLC1                | 1      | -0.473931188 |
| Q14152   | EIF3A_HUMAN  | Eukaryotic translation initiation factor 3 subunit A OS=Homo sapiens GN=EIF3A PE=1 SV=1            | 1      | -0.473931188 |
| Q9C005   | DPY30_HUMAN  | Protein dpy-30 homolog OS=Homo sapiens GN=DPY30 PE=1 SV=1                                          | 1      | -0.473931188 |

|          |              |                                                                                                     |        |              |
|----------|--------------|-----------------------------------------------------------------------------------------------------|--------|--------------|
| Q6P0N0   | M18BP_HUMAN  | Mis18-binding protein 1 OS=Homo sapiens GN=MIS18BP1 PE=1 SV=1                                       | 0.999  | -0.473931188 |
| Q969G6   | RIFK_HUMAN   | Riboflavin kinase OS=Homo sapiens GN=RFK PE=1 SV=2                                                  | 0.9979 | -0.473931188 |
| Q14651   | PLS1_HUMAN   | Plastin-1 OS=Homo sapiens GN=PLS1 PE=1 SV=2                                                         | 0.9928 | -0.473931188 |
| Q5JU85-2 | IQEC2_HUMAN  | Isoform 2 of IQ motif and SEC7 domain-containing protein 2 OS=Homo sapiens GN=IQSEC2                | 0.9927 | -0.473931188 |
| P06899   | H2B1J_HUMAN  | Histone H2B type 1-J OS=Homo sapiens GN=HIST1H2BJ PE=1 SV=3                                         | 0.9831 | -0.473931188 |
| Q13825-2 | AUHM_HUMAN   | Isoform 2 of Methylglutaconyl-CoA hydratase                                                         | 0.9794 | -0.473931188 |
| Q9H0S4   | DDX47_HUMAN  | Probable ATP-dependent RNA helicase DDX47 OS=Homo sapiens GN=DDX47 PE=1 SV=1                        | 0.8967 | -0.473931188 |
| P09622   | DLDH_HUMAN   | Dihydrolipoyl dehydrogenase                                                                         | 1      | -0.49410907  |
| P52732   | KIF11_HUMAN  | Kinesin-like protein KIF11 OS=Homo sapiens GN=KIF11 PE=1 SV=2                                       | 1      | -0.49410907  |
| O96019   | ACTL6A_HUMAN | Actin-like protein 6A OS=Homo sapiens GN=ACTL6A PE=1 SV=1                                           | 1      | -0.49410907  |
| P22695   | QCR2_HUMAN   | Cytochrome b-c1 complex subunit 2                                                                   | 1      | -0.49410907  |
| P27824   | CALX_HUMAN   | Calnexin OS=Homo sapiens GN=CANX PE=1 SV=2                                                          | 1      | -0.49410907  |
| P52907   | CAZA1_HUMAN  | F-actin-capping protein subunit alpha-1 OS=Homo sapiens GN=CAPZA1 PE=1 SV=3                         | 1      | -0.49410907  |
| Q6S8J3   | POTEE_HUMAN  | POTE ankyrin domain family member E OS=Homo sapiens GN=POTEE PE=1 SV=3                              | 0.9988 | -0.49410907  |
| O00231-2 | PSD11_HUMAN  | Isoform 2 of 26S proteasome non-ATPase regulatory subunit 11 OS=Homo sapiens GN=PSMD11              | 0.9927 | -0.49410907  |
| Q8N857-2 | ENAH_HUMAN   | Isoform 2 of Protein enabled homolog OS=Homo sapiens GN=ENAH                                        | 0.9873 | -0.49410907  |
| P30040   | ERP29_HUMAN  | Endoplasmic reticulum resident protein 29 OS=Homo sapiens GN=ERP29 PE=1 SV=4                        | 1      | -0.514573173 |
| P49327   | FAS_HUMAN    | Fatty acid synthase OS=Homo sapiens GN=FASN PE=1 SV=3                                               | 1      | -0.514573173 |
| Q13148-2 | TADBP_HUMAN  | Isoform 2 of TAR DNA-binding protein 43 OS=Homo sapiens GN=TARDBP                                   | 1      | -0.514573173 |
| P68036   | UB2L3_HUMAN  | Ubiquitin-conjugating enzyme E2 L3 OS=Homo sapiens GN=UBE2L3 PE=1 SV=1                              | 0.9915 | -0.514573173 |
| Q14247-2 | SRC8_HUMAN   | Isoform 2 of Src substrate cortactin OS=Homo sapiens GN=CTTN                                        | 0.9891 | -0.514573173 |
| Q8NCM8-2 | DYHC2_HUMAN  | Isoform 2 of Cytoplasmic dynein 2 heavy chain 1 OS=Homo sapiens GN=DYNC2H1                          | 0.9538 | -0.514573173 |
| P16401   | H15_HUMAN    | Histone H1.5 OS=Homo sapiens GN=HIST1H1B PE=1 SV=3                                                  | 1      | -0.535331733 |
| O95202   | LETM1_HUMAN  | LETM1 and EF-hand domain-containing protein 1                                                       | 1      | -0.535331733 |
| P15880   | RS2_HUMAN    | 40S ribosomal protein S2 OS=Homo sapiens GN=RPS2 PE=1 SV=2                                          | 1      | -0.535331733 |
| P24752   | THIL_HUMAN   | Acetyl-CoA acetyltransferase                                                                        | 1      | -0.535331733 |
| P61758   | VPD3_HUMAN   | Prefoldin subunit 3 OS=Homo sapiens GN=VBP1 PE=1 SV=3                                               | 1      | -0.535331733 |
| Q99714   | HCD2_HUMAN   | 3-hydroxyacyl-CoA dehydrogenase type-2 OS=Homo sapiens GN=HSD17B10 PE=1 SV=3                        | 1      | -0.535331733 |
| P10599   | THIO_HUMAN   | Thioredoxin OS=Homo sapiens GN=TXN PE=1 SV=3                                                        | 0.9998 | -0.535331733 |
| Q92922   | SMRC1_HUMAN  | SWI/SNF complex subunit SMARCC1 OS=Homo sapiens GN=SMARCC1 PE=1 SV=3                                | 0.9986 | -0.535331733 |
| Q96FT7-2 | ASIC4_HUMAN  | Isoform 2 of Acid-sensing ion channel 4 OS=Homo sapiens GN=ASIC4                                    | 0.9961 | -0.535331733 |
| Q9BRX8-2 | F213A_HUMAN  | Isoform 2 of Redox-regulatory protein FAM213A OS=Homo sapiens GN=FAM213A                            | 1      | -0.556393349 |
| P00387-3 | NB5R3_HUMAN  | Isoform 3 of NADH-cytochrome b5 reductase 3 OS=Homo sapiens GN=CYB5R3                               | 1      | -0.556393349 |
| P13804-2 | ETFA_HUMAN   | Isoform 2 of Electron transfer flavoprotein subunit alpha                                           | 1      | -0.556393349 |
| P62140   | PP1B_HUMAN   | Serine/threonine-protein phosphatase PP1-beta catalytic subunit OS=Homo sapiens GN=PPP1CB PE=1 SV=1 | 1      | -0.556393349 |
| Q15365   | PCBP1_HUMAN  | Poly(rC)-binding protein 1 OS=Homo sapiens GN=PCBP1 PE=1 SV=2                                       | 1      | -0.556393349 |
| Q15125   | EBP_HUMAN    | 3-beta-hydroxysteroid-Delta(8)                                                                      | 0.9781 | -0.556393349 |
| Q5T946   | Q5T946_HUMAN | Glyoxylate reductase/hydroxypyruvate reductase OS=Homo sapiens GN=GRHPR PE=2 SV=1                   | 0.9636 | -0.556393349 |
| Q13435   | SF3B2_HUMAN  | Splicing factor 3B subunit 2 OS=Homo sapiens GN=SF3B2 PE=1 SV=2                                     | 0.942  | -0.556393349 |
| O95347-2 | SMC2_HUMAN   | Isoform 2 of Structural maintenance of chromosomes protein 2 OS=Homo sapiens GN=SMC2                | 1      | -0.577766999 |
| P08670   | VIME_HUMAN   | Vimentin OS=Homo sapiens GN=VIM PE=1 SV=4                                                           | 1      | -0.577766999 |
| P78344-2 | IF4G2_HUMAN  | Isoform 2 of Eukaryotic translation initiation factor 4 gamma 2 OS=Homo sapiens GN=EIF4G2           | 1      | -0.577766999 |
| Q92974-2 | ARHG2_HUMAN  | Isoform 2 of Rho guanine nucleotide exchange factor 2 OS=Homo sapiens GN=ARHG2                      | 0.9896 | -0.577766999 |
| P00441   | SODC_HUMAN   | Superoxide dismutase [Cu-Zn] OS=Homo sapiens GN=SOD1 PE=1 SV=2                                      | 1      | -0.59946207  |
| Q9UJZ1   | STML2_HUMAN  | Stomatin-like protein 2 OS=Homo sapiens GN=STOML2 PE=1 SV=1                                         | 1      | -0.59946207  |
| O15020-2 | SPTN2_HUMAN  | Isoform 2 of Spectrin beta chain                                                                    | 0.9995 | -0.59946207  |
| P30566-2 | PUR8_HUMAN   | Isoform 2 of Adenylosuccinate lyase OS=Homo sapiens GN=ADSL                                         | 0.9991 | -0.59946207  |
| Q9C0C9   | UBE2O_HUMAN  | Ubiquitin-conjugating enzyme E2 O OS=Homo sapiens GN=UBE2O PE=1 SV=3                                | 0.9912 | -0.59946207  |
| Q96LP4   | YS017_HUMAN  | Putative uncharacterized protein FU25328 OS=Homo sapiens PE=2 SV=1                                  | 0.9808 | -0.59946207  |
| Q7Z4W1   | DCXR_HUMAN   | L-xylulose reductase OS=Homo sapiens GN=DCXR PE=1 SV=2                                              | 1      | -0.621488377 |
| P08621-2 | RU17_HUMAN   | Isoform 2 of U1 small nuclear ribonucleoprotein 70 kDa OS=Homo sapiens GN=SNRNP70                   | 1      | -0.621488377 |
| Q9BXW7-2 | CECR5_HUMAN  | Isoform 1 of Cat eye syndrome critical region protein 5 OS=Homo sapiens GN=CECR5                    | 1      | -0.621488377 |
| C9JDM3   | C9JDM3_HUMAN | Ran-specific GTPase-activating protein (Fragment) OS=Homo sapiens GN=RANBP1 PE=4 SV=1               | 0.9872 | -0.621488377 |
| P21439-2 | MDR3_HUMAN   | Isoform 2 of Multidrug resistance protein 3 OS=Homo sapiens GN=ABCB4                                | 0.9856 | -0.621488377 |
| P53814-2 | SMTN_HUMAN   | Isoform A of Smoothelin OS=Homo sapiens GN=SMTN                                                     | 0.9842 | -0.621488377 |
| Q9ULC4-2 | MCTS1_HUMAN  | Isoform 2 of Malignant T-cell-amplified sequence 1 OS=Homo sapiens GN=MCTS1                         | 0.9778 | -0.621488377 |
| H0YAE5   | H0YAE5_HUMAN | Matrix metalloproteinase-23                                                                         | 0.975  | -0.621488377 |
| P05386   | RLA1_HUMAN   | 60S acidic ribosomal protein P1 OS=Homo sapiens GN=RPLP1 PE=1 SV=1                                  | 1      | -0.64385619  |
| Q01518   | CAP1_HUMAN   | Adenylyl cyclase-associated protein 1 OS=Homo sapiens GN=CAP1 PE=1 SV=5                             | 1      | -0.64385619  |
| Q86US8   | EST1A_HUMAN  | Telomerase-binding protein EST1A OS=Homo sapiens GN=SMG6 PE=1 SV=2                                  | 0.9994 | -0.64385619  |
| P10412   | H14_HUMAN    | Histone H1.4 OS=Homo sapiens GN=HIST1H1E PE=1 SV=2                                                  | 1      | -0.666572626 |
| Q5SW79-3 | CE170_HUMAN  | Isoform 3 of Centrosomal protein of 170 kDa OS=Homo sapiens GN=CEP170                               | 0.9993 | -0.666572626 |
| P27487   | DPP4_HUMAN   | Dipeptidyl peptidase 4 OS=Homo sapiens GN=DPP4 PE=1 SV=2                                            | 0.979  | -0.666572626 |
| Q9BYV6-3 | TRI55_HUMAN  | Isoform 3 of Tripartite motif-containing protein 55 OS=Homo sapiens GN=TRIM55                       | 0.915  | -0.666572626 |
| Q7Z7H8   | RM10_HUMAN   | 39S ribosomal protein L10                                                                           | 1      | -0.689659879 |
| O60814   | H2B1K_HUMAN  | Histone H2B type 1-K OS=Homo sapiens GN=HIST1H2BK PE=1 SV=3                                         | 1      | -0.689659879 |
| P20290-2 | BTF3_HUMAN   | Isoform 2 of Transcription factor BTF3 OS=Homo sapiens GN=BTF3                                      | 1      | -0.689659879 |
| Q9UHD8-5 | SEPT9_HUMAN  | Isoform 5 of Septin-9 OS=Homo sapiens GN=SEPT9                                                      | 0.9995 | -0.689659879 |
| Q8WYA6   | CTBL1_HUMAN  | Beta-catenin-like protein 1 OS=Homo sapiens GN=CTNBL1 PE=1 SV=1                                     | 0.9951 | -0.689659879 |
| P47756-2 | CAPZB_HUMAN  | Isoform 2 of F-actin-capping protein subunit beta OS=Homo sapiens GN=CAPZB                          | 1      | -0.713118852 |
| Q86UE4   | LYRIC_HUMAN  | Protein LYRIC OS=Homo sapiens GN=MTDH PE=1 SV=2                                                     | 1      | -0.713118852 |
| P24539   | AT5F1_HUMAN  | ATP synthase subunit b                                                                              | 1      | -0.713118852 |
| Q7Z6E9-2 | RBBP6_HUMAN  | Isoform 2 of E3 ubiquitin-protein ligase RBBP6 OS=Homo sapiens GN=RBBP6                             | 1      | -0.713118852 |
| Q86XP3-2 | DDX42_HUMAN  | Isoform 2 of ATP-dependent RNA helicase DDX42 OS=Homo sapiens GN=DDX42                              | 0.9993 | -0.713118852 |
| O60869-2 | EDF1_HUMAN   | Isoform 2 of Endothelial differentiation-related factor 1 OS=Homo sapiens GN=EDF1                   | 0.9981 | -0.713118852 |
| P20674   | COX5A_HUMAN  | Cytochrome c oxidase subunit 5A                                                                     | 0.9957 | -0.713118852 |
| Q96BW9   | TAM41_HUMAN  | Mitochondrial translocator assembly and maintenance protein 41 homolog OS=Homo sapiens GN=TAMI      | 0.988  | -0.713118852 |
| Q14204   | DYHC1_HUMAN  | Cytoplasmic dynein 1 heavy chain 1 OS=Homo sapiens GN=DYNC1H1 PE=1 SV=5                             | 1      | -0.736965594 |
| P53004   | BIEA_HUMAN   | Biliverdin reductase A OS=Homo sapiens GN=BLVRA PE=1 SV=2                                           | 0.9998 | -0.736965594 |
| Q9Y5K5-2 | UCHL5_HUMAN  | Isoform 2 of Ubiquitin carboxyl-terminal hydrolase isozyme L5 OS=Homo sapiens GN=UCHL5              | 0.9996 | -0.736965594 |
| F5H0L1   | F5H0L1_HUMAN | Cullin-7 OS=Homo sapiens GN=CUL7 PE=3 SV=1                                                          | 0.9797 | -0.736965594 |
| P54709   | AT1B3_HUMAN  | Sodium/potassium-transporting ATPase subunit beta-3 OS=Homo sapiens GN=ATP1B3 PE=1 SV=1             | 1      | -0.76121314  |
| O60885-2 | BRD4_HUMAN   | Isoform 2 of Bromodomain-containing protein 4 OS=Homo sapiens GN=BRD4                               | 0.9885 | -0.76121314  |
| Q9GZR7   | DDX24_HUMAN  | ATP-dependent RNA helicase DDX24 OS=Homo sapiens GN=DDX24 PE=1 SV=1                                 | 0.9671 | -0.76121314  |
| O96008   | TOM40_HUMAN  | Mitochondrial import receptor subunit TOM40 homolog OS=Homo sapiens GN=TOMM40 PE=1 SV=1             | 1      | -0.785875195 |
| P16403   | H12_HUMAN    | Histone H1.2 OS=Homo sapiens GN=HIST1H1C PE=1 SV=2                                                  | 1      | -0.785875195 |
| P62314   | SMD1_HUMAN   | Small nuclear ribonucleoprotein Sm D1 OS=Homo sapiens GN=SNRPD1 PE=1 SV=1                           | 1      | -0.785875195 |
| Q8N3T6   | T132C_HUMAN  | Transmembrane protein 132C OS=Homo sapiens GN=TMEM132C PE=2 SV=3                                    | 0.9994 | -0.785875195 |
| I3L1E1   | I3L1E1_HUMAN | Uncharacterized protein OS=Homo sapiens PE=4 SV=1                                                   | 0.9196 | -0.785875195 |
| Q9BYN8   | RT26_HUMAN   | 28S ribosomal protein S26                                                                           | 0.8861 | -0.785875195 |
| Q7Z2W9   | RM21_HUMAN   | 39S ribosomal protein L21                                                                           | 0.808  | -0.785875195 |
| Q8NBX0   | SCPDL_HUMAN  | Saccharopine dehydrogenase-like oxidoreductase OS=Homo sapiens GN=SCCPDH PE=1 SV=1                  | 0.9999 | -0.810966176 |

|          |               |                                                                                                        |        |              |
|----------|---------------|--------------------------------------------------------------------------------------------------------|--------|--------------|
| P84243   | H33_HUMAN     | Histone H3.3 OS=Homo sapiens GN=H3F3A PE=1 SV=2                                                        | 0.9997 | -0.810966176 |
| Q9UBU8-2 | MO4L1_HUMAN   | Isoform 2 of Mortality factor 4-like protein 1 OS=Homo sapiens GN=MORF4L1                              | 0.9974 | -0.836501268 |
| P38935   | SMBP2_HUMAN   | DNA-binding protein SMBP2 OS=Homo sapiens GN=IGHMBP2 PE=1 SV=3                                         | 0.9492 | -0.836501268 |
| P62805   | H4_HUMAN      | Histone H4 OS=Homo sapiens GN=HIST1H4A PE=1 SV=2                                                       | 1      | -0.862496476 |
| O43809   | CPSF5_HUMAN   | Cleavage and polyadenylation specificity factor subunit 5 OS=Homo sapiens GN=NUDT21 PE=1 SV=1          | 1      | -0.862496476 |
| O75489   | NDU53_HUMAN   | NADH dehydrogenase [ubiquinone] iron-sulfur protein 3                                                  | 1      | -0.862496476 |
| Q16795   | NDUA9_HUMAN   | NADH dehydrogenase [ubiquinone] 1 alpha subcomplex subunit 9                                           | 1      | -0.862496476 |
| Q9BPW8   | NIPS1_HUMAN   | Protein NipSnap homolog 1 OS=Homo sapiens GN=NIPSNAP1 PE=1 SV=1                                        | 1      | -0.862496476 |
| Q9P000-2 | COMD9_HUMAN   | Isoform 2 of COMM domain-containing protein 9 OS=Homo sapiens GN=COMMD9                                | 0.9505 | -0.862496476 |
| P13796   | PLSL_HUMAN    | Plastin-2 OS=Homo sapiens GN=LCP1 PE=1 SV=6                                                            | 1      | -0.888968688 |
| Q9Y5A9-2 | YTHD2_HUMAN   | Isoform 2 of YTH domain family protein 2 OS=Homo sapiens GN=YTHDF2                                     | 0.9994 | -0.888968688 |
| P00403   | COX2_HUMAN    | Cytochrome c oxidase subunit 2 OS=Homo sapiens GN=MT-CO2 PE=1 SV=1                                     | 0.9981 | -0.888968688 |
| Q965B4-3 | SRPK1_HUMAN   | Isoform 1 of SRSF protein kinase 1 OS=Homo sapiens GN=SRPK1                                            | 0.9276 | -0.915935735 |
| Q6ZP65   | BICR1_HUMAN   | Bicaudal D-related protein 1 OS=Homo sapiens GN=CCDC64 PE=2 SV=2                                       | 0.9888 | -0.943416472 |
| P42771-2 | CD2A1_HUMAN   | Isoform 2 of Cyclin-dependent kinase inhibitor 2A                                                      | 0.9852 | -0.943416472 |
| P07225   | PROS_HUMAN    | Vitamin K-dependent protein S OS=Homo sapiens GN=PROS1 PE=1 SV=1                                       | 0.9415 | -0.943416472 |
| Q96T58   | MINT_HUMAN    | Msx2-interacting protein OS=Homo sapiens GN=SPEN PE=1 SV=1                                             | 0.9394 | -0.943416472 |
| Q9UPY3-2 | DICER_HUMAN   | Isoform 2 of Endoribonuclease Dicer OS=Homo sapiens GN=DICER1                                          | 0.8812 | -0.943416472 |
| Q14008-2 | CKAP5_HUMAN   | Isoform 2 of Cytoskeleton-associated protein 5 OS=Homo sapiens GN=CKAP5                                | 1      | -0.971430848 |
| Q16763   | UBE2S_HUMAN   | Ubiquitin-conjugating enzyme E2 S OS=Homo sapiens GN=UBE2S PE=1 SV=2                                   | 0.9999 | -0.971430848 |
| P28161   | GSTM2_HUMAN   | Glutathione S-transferase Mu 2 OS=Homo sapiens GN=GSTM2 PE=1 SV=2                                      | 0.9994 | -0.971430848 |
| P32004-2 | L1CAM_HUMAN   | Isoform 2 of Neural cell adhesion molecule L1 OS=Homo sapiens GN=L1CAM                                 | 0.9989 | -0.971430848 |
| Q6IQ23-2 | PKHA7_HUMAN   | Isoform 2 of Pleckstrin homology domain-containing family A member 7 OS=Homo sapiens GN=PLEKH7         | 0.9938 | -0.971430848 |
| Q9BXP5-2 | SRRT_HUMAN    | Isoform 2 of Serrate RNA effector molecule homolog OS=Homo sapiens GN=SRRT                             | 0.9669 | -0.971430848 |
| Q9BTC0   | DIDO1_HUMAN   | Death-inducer obliterator 1 OS=Homo sapiens GN=DIDO1 PE=1 SV=5                                         | 0.9845 | -1           |
| Q9H9J2   | RM44_HUMAN    | 39S ribosomal protein L44                                                                              | 0.8585 | -1           |
| O14874   | BCKD_HUMAN    | [3-methyl-2-oxobutanoate dehydrogenase [lipamide]] kinase                                              | 0.8107 | -1.029146346 |
| P0C7U0   | PPR28_HUMAN   | Protein phosphatase 1 regulatory subunit 28 OS=Homo sapiens GN=ELFN1 PE=1 SV=1                         | 1      | -1.089267338 |
| Q9Y277-2 | VDAC3_HUMAN   | Isoform 2 of Voltage-dependent anion-selective channel protein 3 OS=Homo sapiens GN=VDAC3              | 1      | -1.089267338 |
| Q13009   | TIAM1_HUMAN   | T-lymphoma invasion and metastasis-inducing protein 1 OS=Homo sapiens GN=TIAM1 PE=1 SV=2               | 0.9999 | -1.089267338 |
| Q00796   | DHSO_HUMAN    | Sorbitol dehydrogenase OS=Homo sapiens GN=SORD PE=1 SV=4                                               | 0.9997 | -1.089267338 |
| Q8NI27   | THOC2_HUMAN   | THO complex subunit 2 OS=Homo sapiens GN=THOC2 PE=1 SV=2                                               | 0.9985 | -1.089267338 |
| P25325   | THTM_HUMAN    | 3-mercaptopyruvate sulfurtransferase OS=Homo sapiens GN=MPST PE=1 SV=3                                 | 1      | -1.152003093 |
| Q14517   | FAT1_HUMAN    | Protocadherin Fat 1 OS=Homo sapiens GN=FAT1 PE=1 SV=2                                                  | 0.9998 | -1.152003093 |
| Q16363-2 | LAMA4_HUMAN   | Isoform 2 of Laminin subunit alpha-4 OS=Homo sapiens GN=LAMA4                                          | 0.9984 | -1.152003093 |
| Q12849-5 | GRSF1_HUMAN   | Isoform 2 of G-rich sequence factor 1 OS=Homo sapiens GN=GRSF1                                         | 0.994  | -1.152003093 |
| F8WAI1   | F8WAI1_HUMAN  | Immunoglobulin-like and fibronectin type III domain-containing protein 1 OS=Homo sapiens GN=IGFN1      | 1      | -1.184424571 |
| P35908   | K22E_HUMAN    | Keratin                                                                                                | 0.9985 | -1.184424571 |
| Q8IVL6-2 | P3H3_HUMAN    | Isoform 2 of Prolyl 3-hydroxylase 3 OS=Homo sapiens GN=LEPREL2                                         | 0.8109 | -1.184424571 |
| Q8N1G2   | MTR1_HUMAN    | Cap-specific mRNA (nucleoside-2'-O-)-methyltransferase 1 OS=Homo sapiens GN=FTSD2 PE=1 SV=1            | 0.9964 | -1.251538767 |
| Q5JTZ9   | SYAM_HUMAN    | Alanine--tRNA ligase                                                                                   | 0.9843 | -1.251538767 |
| Q8TEK3-2 | DOT1L_HUMAN   | Isoform 1 of Histone-Lysine N-methyltransferase                                                        | 0.9762 | -1.286304185 |
| Q14203   | DCTN1_HUMAN   | Dynactin subunit 1 OS=Homo sapiens GN=DCTN1 PE=1 SV=3                                                  | 0.9703 | -1.321928095 |
| Q5VUUA   | ZN318_HUMAN   | Zinc finger protein 318 OS=Homo sapiens GN=ZNF318 PE=1 SV=2                                            | 0.9989 | -1.358453971 |
| Q4VXP2   | Q4VXP2_HUMAN  | Potassium voltage-gated channel subfamily KQT member 2 OS=Homo sapiens GN=KCNQ2 PE=2 SV=1              | 0.9993 | -1.395928676 |
| O43805   | SSNA1_HUMAN   | Sjogren syndrome nuclear autoantigen 1 OS=Homo sapiens GN=SSNA1 PE=1 SV=2                              | 0.9974 | -1.395928676 |
| P04908   | H2A1B_HUMAN   | Histone H2A type 1-B/E OS=Homo sapiens GN=HIST1H2AB PE=1 SV=2                                          | 1      | -1.434402824 |
| Q9Y2G4-1 | ANKR6_HUMAN   | Isoform 2 of Ankyrin repeat domain-containing protein 6 OS=Homo sapiens GN=ANKRD6                      | 0.9171 | -1.434402824 |
| P20648   | ATP4A_HUMAN   | Potassium-transporting ATPase alpha chain 1 OS=Homo sapiens GN=ATP4A PE=2 SV=5                         | 1      | -1.473931188 |
| Q15056-2 | IF4H_HUMAN    | Isoform Short of Eukaryotic translation initiation factor 4H OS=Homo sapiens GN=EIF4H                  | 0.9813 | -1.473931188 |
| B2RTY4-2 | MYO9A_HUMAN   | Isoform 2 of Unconventional myosin-IXa OS=Homo sapiens GN=MYO9A                                        | 0.9577 | -1.473931188 |
| Q86V15   | CASZ1_HUMAN   | Zinc finger protein castor homolog 1 OS=Homo sapiens GN=CASZ1 PE=2 SV=4                                | 0.9996 | -1.514573173 |
| Q9NWW4   | CD027_HUMAN   | UPF0609 protein C4orf27 OS=Homo sapiens GN=C4orf27 PE=1 SV=2                                           | 0.9993 | -1.514573173 |
| Q8NEM7   | FA48A_HUMAN   | Protein FAM48A OS=Homo sapiens GN=FAM48A PE=1 SV=2                                                     | 0.9886 | -1.514573173 |
| Q96NP5   | Q96NP5_HUMAN  | HCG2008157 OS=Homo sapiens GN=hCG_2008157 PE=2 SV=1                                                    | 0.9659 | -1.514573173 |
| P09001   | RM03_HUMAN    | 39S ribosomal protein L3                                                                               | 0.9586 | -1.514573173 |
| Q6N043-2 | Z280D_HUMAN   | Isoform 2 of Zinc finger protein 280D OS=Homo sapiens GN=ZNF280D                                       | 0.9951 | -1.556393349 |
| Q9NP61   | ARFG3_HUMAN   | ADP-ribosylation factor GTPase-activating protein 3 OS=Homo sapiens GN=ARFGAP3 PE=1 SV=1               | 0.9819 | -1.556393349 |
| O95983-2 | MBD3_HUMAN    | Isoform 2 of Methyl-CpG-binding domain protein 3 OS=Homo sapiens GN=MBD3                               | 0.9995 | -1.689659879 |
| O15481   | MAGB4_HUMAN   | Melanoma-associated antigen B4 OS=Homo sapiens GN=MAGEB4 PE=1 SV=1                                     | 0.9769 | -1.689659879 |
| Q9UPQ7-2 | PZRN3_HUMAN   | Isoform 2 of E3 ubiquitin-protein ligase PDZRN3 OS=Homo sapiens GN=PDZRN3                              | 0.9761 | -1.689659879 |
| P04264   | K2C1_HUMAN    | Keratin                                                                                                | 0.9955 | -1.785875195 |
| H7C3E0   | H7C3E0_HUMAN  | Carboxy-terminal domain RNA polymerase II polypeptide A small phosphatase 1 (Fragment) OS=Homo sapiens | 0.9722 | -1.785875195 |
| O00602   | FCN1_HUMAN    | Ficolin-1 OS=Homo sapiens GN=FCN1 PE=1 SV=2                                                            | 0.9507 | -1.836501268 |
| D6RGV7   | D6RGV7_HUMAN  | Immunoglobulin superfamily member 22 OS=Homo sapiens GN=IGSF22 PE=4 SV=1                               | 0.9679 | -1.943416472 |
| Q9BR39-2 | JPH2_HUMAN    | Isoform 2 of Junctophilin-2 OS=Homo sapiens GN=JPH2                                                    | 0.9492 | -1.943416472 |
| B7ZM82   | B7ZM82_HUMAN  | Protein Wiz OS=Homo sapiens GN=WIZ PE=2 SV=1                                                           | 0.9583 | -2           |
| Q9Y618-3 | NCOR2_HUMAN   | Isoform 3 of Nuclear receptor corepressor 2 OS=Homo sapiens GN=NCOR2                                   | 0.9037 | -2           |
| H3BPPE1  | H3BPPE1_HUMAN | Microtubule-actin cross-linking factor 1                                                               | 0.9999 | -2.120294234 |
| Q3MIP1   | IPIL2_HUMAN   | Inositol 1                                                                                             | 0.9962 | -2.120294234 |
| Q9H6D7-3 | HAUS4_HUMAN   | Isoform 3 of HAUS augmin-like complex subunit 4 OS=Homo sapiens GN=HAUS4                               | 0.9887 | -2.120294234 |
| Q8IYB8   | SUV3_HUMAN    | ATP-dependent RNA helicase SUPV3L1                                                                     | 0.9485 | -2.120294234 |
| Q9H1H9-2 | KIF13A_HUMAN  | Isoform 2 of Kinesin-like protein KIF13A OS=Homo sapiens GN=KIF13A                                     | 1      | -2.184424571 |
| Q9UULM3  | YEYS2_HUMAN   | YEATS domain-containing protein 2 OS=Homo sapiens GN=YEATS2 PE=1 SV=2                                  | 0.9997 | -2.184424571 |
| Q9NV56   | MRGBP_HUMAN   | MRG-binding protein OS=Homo sapiens GN=MRGBP PE=1 SV=1                                                 | 0.9706 | -2.184424571 |
| O15021-1 | MAST4_HUMAN   | Isoform 5 of Microtubule-associated serine/threonine-protein kinase 4 OS=Homo sapiens GN=MAST4         | 0.9993 | -2.251538767 |
| Q8N302   | AGGF1_HUMAN   | Angiogenic factor with G patch and FHA domains 1 OS=Homo sapiens GN=AGGF1 PE=1 SV=2                    | 0.9887 | -2.251538767 |
| E9PBE3   | E9PBE3_HUMAN  | Bardet-Biedl syndrome 5 protein OS=Homo sapiens GN=BB55 PE=4 SV=1                                      | 0.9818 | -2.251538767 |
| Q5JSZ5   | PRRC2B_HUMAN  | Protein PRRC2B OS=Homo sapiens GN=PRRC2B PE=1 SV=2                                                     | 0.9693 | -2.251538767 |
| HOYMT1   | HOYMT1_HUMAN  | Talin-2 (Fragment) OS=Homo sapiens GN=TLN2 PE=4 SV=1                                                   | 0.9419 | -2.251538767 |
| P02458-1 | CO2A1_HUMAN   | Isoform 1 of Collagen alpha-1(II) chain OS=Homo sapiens GN=COL2A1                                      | 1      | -2.473931188 |
| P20930   | FILA_HUMAN    | Filaggrin OS=Homo sapiens GN=FLG PE=1 SV=3                                                             | 0.9999 | -2.473931188 |
| Q9P227   | RHG23_HUMAN   | Rho GTPase-activating protein 23 OS=Homo sapiens GN=ARHGAP23 PE=1 SV=2                                 | 0.9999 | -2.473931188 |
| O14827   | RGRF2_HUMAN   | Ras-specific guanine nucleotide-releasing factor 2 OS=Homo sapiens GN=RASGRF2 PE=1 SV=2                | 0.9914 | -2.473931188 |
| Q9BYB0-2 | SHANK3_HUMAN  | Isoform 2 of SH3 and multiple ankyrin repeat domains protein 3 OS=Homo sapiens GN=SHANK3               | 0.999  | -2.56393349  |
| Q9Y2V7-2 | COG6_HUMAN    | Isoform 2 of Conserved oligomeric Golgi complex subunit 6 OS=Homo sapiens GN=COG6                      | 0.9807 | -2.64385619  |
| Q9Y5B9   | SP16H_HUMAN   | FACT complex subunit SPT16 OS=Homo sapiens GN=SPT16H PE=1 SV=1                                         | 0.9782 | -2.64385619  |
| F6QF33   | F6QF33_HUMAN  | Killer cell immunoglobulin-like receptor 3DL1 OS=Homo sapiens GN=KIR3DL1 PE=4 SV=1                     | 0.9658 | -2.64385619  |
| Q9UDT6-2 | CLIP2_HUMAN   | Isoform 2 of CAP-Gly domain-containing linker protein 2 OS=Homo sapiens GN=CLIP2                       | 0.9959 | -2.736965594 |
| P51587   | BRCA2_HUMAN   | Breast cancer type 2 susceptibility protein OS=Homo sapiens GN=BRCA2 PE=1 SV=2                         | 0.988  | -2.736965594 |
| Q5VTQ0-3 | TT39B_HUMAN   | Isoform 3 of Tetratricopeptide repeat protein 39B OS=Homo sapiens GN=TTC39B                            | 0.9286 | -2.736965594 |
| Q14055   | CO9A2_HUMAN   | Collagen alpha-2(IX) chain OS=Homo sapiens GN=COL9A2 PE=1 SV=2                                         | 0.9997 | -2.943416472 |

|           |              |                                                                                                    |        |              |
|-----------|--------------|----------------------------------------------------------------------------------------------------|--------|--------------|
| Q63HN8-4  | RN213_HUMAN  | Isoform 2 of E3 ubiquitin-protein ligase RNF213 OS=Homo sapiens GN=RNF213                          | 0.928  | -2.943416472 |
| Q99062-2  | CSF3R_HUMAN  | Isoform 2 of Granulocyte colony-stimulating factor receptor OS=Homo sapiens GN=CSF3R               | 1      | -3.058893689 |
| Q08J23-2  | NSUN2_HUMAN  | Isoform 2 of tRNA (cytosine(34)-C(5))-methyltransferase OS=Homo sapiens GN=NSUN2                   | 0.9997 | -3.058893689 |
| Q16254    | Q16254       | Transcription factor E2F4 OS=Homo sapiens GN=E2F4 PE=1 SV=2                                        | 0.9752 | -3.058893689 |
| O15381-2  | NVL_HUMAN    | Isoform 2 of Nuclear valosin-containing protein-like OS=Homo sapiens GN=NVL                        | 0.921  | -3.184424571 |
| O75592-2  | MYCB2_HUMAN  | Isoform 2 of Probable E3 ubiquitin-protein ligase MYCBP2 OS=Homo sapiens GN=MYCBP2                 | 0.9976 | -3.321928095 |
| Q5VZE5    | NAA35_HUMAN  | N-alpha-acetyltransferase 35                                                                       | 0.9969 | -3.321928095 |
| Q9Y5T5-2  | UBP16_HUMAN  | Isoform 2 of Ubiquitin carboxyl-terminal hydrolase 16 OS=Homo sapiens GN=USP16                     | 0.9862 | -3.321928095 |
| Q15046-2  | SYK_HUMAN    | Isoform Mitochondrial of Lysine-tRNA ligase OS=Homo sapiens GN=KARS                                | 0.9648 | -3.321928095 |
| Q96L91-2  | EP400_HUMAN  | Isoform 2 of E1A-binding protein p400 OS=Homo sapiens GN=EP400                                     | 0.9489 | -3.321928095 |
| Q7Z2K8    | GRIN1_HUMAN  | G protein-regulated inducer of neurite outgrowth 1 OS=Homo sapiens GN=GPRIN1 PE=1 SV=2             | 1      | -3.473931188 |
| Q99996-2  | AKAP9_HUMAN  | Isoform 2 of A-kinase anchor protein 9 OS=Homo sapiens GN=AKAP9                                    | 1      | -3.473931188 |
| O15417-2  | TNC18_HUMAN  | Isoform 2 of Trinucleotide repeat-containing gene 18 protein OS=Homo sapiens GN=TNRC18             | 0.9987 | -3.473931188 |
| Q13562    | NDF1_HUMAN   | Neurogenic differentiation factor 1 OS=Homo sapiens GN=NEUROD1 PE=1 SV=3                           | 0.9969 | -3.473931188 |
| Q5V706    | CE350_HUMAN  | Centrosome-associated protein 350 OS=Homo sapiens GN=CEP350 PE=1 SV=1                              | 1      | -3.64385619  |
| F8VXG0    | F8VXG0_HUMAN | Homeobox protein Hox-B3 OS=Homo sapiens GN=HOXB3 PE=3 SV=1                                         | 0.8305 | -3.64385619  |
| Q5VWJ9    | SNX30_HUMAN  | Sorting nexin-30 OS=Homo sapiens GN=SNX30 PE=1 SV=1                                                | 0.9637 | -3.836501268 |
| Q8IVL1-10 | NAV2_HUMAN   | Isoform 10 of Neuron navigator 2 OS=Homo sapiens GN=NAV2                                           | 0.9889 | -4.058893689 |
| P07942    | LAMB1_HUMAN  | Laminin subunit beta-1 OS=Homo sapiens GN=LAMB1 PE=1 SV=2                                          | 0.9974 | -4.321928095 |
| C9JLR9    | CK095_HUMAN  | Uncharacterized protein C11orf95 OS=Homo sapiens GN=C11orf95 PE=2 SV=1                             | 0.9794 | -4.321928095 |
| Q92618    | ZN516_HUMAN  | Zinc finger protein 516 OS=Homo sapiens GN=ZNF516 PE=1 SV=1                                        | 0.9626 | -4.321928095 |
| Q8N535    | CB052_HUMAN  | Putative uncharacterized protein encoded by LINC00471 OS=Homo sapiens GN=LINC00471 PE=5 SV=1       | 0.9956 | -4.64385619  |
| Q9BRK4    | LZTS2_HUMAN  | Leucine zipper putative tumor suppressor 2 OS=Homo sapiens GN=LZTS2 PE=1 SV=2                      | 0.9612 | -4.64385619  |
| O00423-3  | EMAL1_HUMAN  | Isoform 3 of Echinoderm microtubule-associated protein-like 1 OS=Homo sapiens GN=EML1              | 0.9386 | -4.64385619  |
| Q7KZ85    | SPT6_HUMAN   | Transcription elongation factor SPT6 OS=Homo sapiens GN=SPT6H PE=1 SV=2                            | 0.9985 | -5.058893689 |
| Q02539    | H11_HUMAN    | Histone H1.1 OS=Homo sapiens GN=HIST1H1A PE=1 SV=3                                                 | 0.9974 | -5.058893689 |
| A6NMZ7    | CO6A6_HUMAN  | Collagen alpha-6(VI) chain OS=Homo sapiens GN=COL6A6 PE=1 SV=2                                     | 0.9985 | -5.64385619  |
| Q9BX12    | CCG6_HUMAN   | Voltage-dependent calcium channel gamma-6 subunit OS=Homo sapiens GN=CACNG6 PE=2 SV=1              | 0.9451 | -5.64385619  |
| O75475    | PSIP1_HUMAN  | PC4 and SFRS1-interacting protein OS=Homo sapiens GN=PSIP1 PE=1 SV=1                               | 0.9985 | -6.64385619  |
| Q6ZN55-2  | ZN574_HUMAN  | Isoform 2 of Zinc finger protein 574 OS=Homo sapiens GN=ZNF574                                     | 0.9951 | -6.64385619  |
| P36957    | ODO2_HUMAN   | Dihydrodipolyllysine-residue succinyltransferase component of 2-oxoglutarate dehydrogenase complex | 0.9728 | -6.64385619  |
| Q92736-2  | RYR2_HUMAN   | Isoform 2 of Ryanodine receptor 2 OS=Homo sapiens GN=RYR2                                          | 0.8284 | -6.64385619  |
| Q659C4-2  | LAR1B_HUMAN  | Isoform 2 of La-related protein 1B OS=Homo sapiens GN=LARP1B                                       | 0.9909 | 9.964340868  |
| Q14562    | DHX8_HUMAN   | ATP-dependent RNA helicase DHX8 OS=Homo sapiens GN=DHX8 PE=1 SV=1                                  | 0.9465 | 6.453517579  |
| I3L404    | I3L404_HUMAN | 40S ribosomal protein S2 (Fragment) OS=Homo sapiens GN=RPS2 PE=3 SV=1                              | 0.9596 | 6.036942845  |
| A0AVI2    | FR1L5_HUMAN  | Fer-1-like protein 5 OS=Homo sapiens GN=FR1L5 PE=2 SV=2                                            | 0.9961 | 5.283921772  |
| Q9UL58    | ZN215_HUMAN  | Zinc finger protein 215 OS=Homo sapiens GN=ZNF215 PE=2 SV=2                                        | 0.9299 | 5.098032083  |
| Q86TB3    | ALPK2_HUMAN  | Coiled-coil protein kinase 2 OS=Homo sapiens GN=ALPK2 PE=1 SV=3                                    | 0.9663 | 4.307428525  |
| Q8NDH2    | CC168_HUMAN  | Coiled-coil domain-containing protein 168 OS=Homo sapiens GN=CCDC168 PE=2 SV=2                     | 0.9685 | 4.041768665  |
| Q8IUD2-2  | RB612_HUMAN  | Isoform 2 of ELKS/Rab6-interacting/CAST family member 1 OS=Homo sapiens GN=ERC1                    | 0.8806 | 3.959770155  |
| P25391    | LAMA1_HUMAN  | Laminin subunit alpha-1 OS=Homo sapiens GN=LAMA1 PE=1 SV=2                                         | 0.9994 | 3.014355293  |
| F5GWR6    | F5GWR6_HUMAN | Homeobox protein cut-like 2 (Fragment) OS=Homo sapiens GN=CUX2 PE=4 SV=2                           | 0.7888 | 2.969195503  |
| Q86XW9-2  | TXND6_HUMAN  | Isoform 2 of Thioredoxin domain-containing protein 6 OS=Homo sapiens GN=NME9                       | 0.9593 | 2.965322548  |
| Q6E0U4-2  | DMKN_HUMAN   | Isoform 2 of Dermokine OS=Homo sapiens GN=DMKN                                                     | 0.9899 | 2.944858446  |
| Q69VZ2    | T200B_HUMAN  | Transmembrane protein 200B OS=Homo sapiens GN=TMEM200B PE=2 SV=1                                   | 0.9671 | 2.769771739  |
| J3KT41    | J3KT41_HUMAN | SRC kinase-signaling inhibitor 1 (Fragment) OS=Homo sapiens GN=SRCIN1 PE=4 SV=1                    | 0.863  | 2.50589093   |
| Q9NY28    | GALT8_HUMAN  | Probable polypeptide N-acetylglucosaminyltransferase 8 OS=Homo sapiens GN=GALNT8 PE=2 SV=1         | 0.9535 | 2.480265122  |
| Q96PE2    | ARHGH_HUMAN  | Rho guanine nucleotide exchange factor 17 OS=Homo sapiens GN=ARHGEF17 PE=1 SV=1                    | 0.9943 | 2.451540833  |
| Q9Y6X6    | MYO16_HUMAN  | Unconventional myosin-XVI OS=Homo sapiens GN=MYO16 PE=1 SV=3                                       | 1      | 2.13093087   |
| Q5T3J0-3  | GPTC4_HUMAN  | Isoform 3 of G patch domain-containing protein 4 OS=Homo sapiens GN=GPATCH4                        | 0.9423 | 2.010779839  |
| P54259    | ATN1_HUMAN   | Atrophin-1 OS=Homo sapiens GN=ATN1 PE=1 SV=3                                                       | 0.923  | 1.956056652  |
| Q9BQ69    | MACD1_HUMAN  | O-acetyl-ADP-ribose deacetylase MACROD1 OS=Homo sapiens GN=MACROD1 PE=1 SV=2                       | 0.9861 | 1.90303827   |
| Q9NYU1    | UGGT2_HUMAN  | UDP-glucose:glycoprotein glucosyltransferase 2 OS=Homo sapiens GN=UGGT2 PE=1 SV=4                  | 0.9621 | 1.89917563   |
| Q7LS91    | DOK3_HUMAN   | Docking protein 3 OS=Homo sapiens GN=DOK3 PE=1 SV=2                                                | 0.9677 | 1.879705766  |
| Q2MKA7-2  | RSPO1_HUMAN  | Isoform 2 of R-spondin-1 OS=Homo sapiens GN=RSPO1                                                  | 0.9139 | 1.761285273  |
| P40937-2  | RFC5_HUMAN   | Isoform 2 of Replication factor C subunit 5 OS=Homo sapiens GN=RFC5                                | 0.991  | 1.459431619  |
| Q5VST9-2  | OBSCN_HUMAN  | Isoform 2 of Obscurin OS=Homo sapiens GN=OBSCN                                                     | 1      | 1.350497247  |
| E9PJL5    | E9PJL5_HUMAN | Uncharacterized protein C12orf55 OS=Homo sapiens GN=C12orf55 PE=4 SV=1                             | 0.9996 | 1.316145742  |
| Q9NTK5-2  | OLA1_HUMAN   | Isoform 2 of Obg-like ATPase 1 OS=Homo sapiens GN=OLA1                                             | 0.8459 | 1.269033146  |
| Q8IVF2-3  | AHNAK2_HUMAN | Isoform 3 of Protein AHNAK2 OS=Homo sapiens GN=AHNAK2                                              | 0.9805 | 1.244887059  |
| Q8TDG2    | ACTT1_HUMAN  | Actin-related protein T1 OS=Homo sapiens GN=ACTRT1 PE=2 SV=2                                       | 0.977  | 1.220329955  |
| Q05C16    | LRC63_HUMAN  | Leucine-rich repeat-containing protein 63 OS=Homo sapiens GN=LRR63 PE=2 SV=2                       | 0.9329 | 1.214124805  |
| P02452    | CO1A1_HUMAN  | Collagen alpha-1(I) chain OS=Homo sapiens GN=COL1A1 PE=1 SV=5                                      | 0.9619 | 1.176322773  |
| Q8TDX9-2  | PK1L1_HUMAN  | Isoform 2 of Polycystic kidney disease protein 1-like 1 OS=Homo sapiens GN=PKD1L1                  | 0.9671 | 1.14404637   |
| Q9P1Z9-2  | C1174_HUMAN  | Isoform 2 of Uncharacterized protein C9orf174 OS=Homo sapiens GN=C9orf174                          | 0.8997 | 1.137503524  |
| Q9Y3T9    | NOC2L_HUMAN  | Nucleolar complex protein 2 homolog OS=Homo sapiens GN=NOC2L PE=1 SV=4                             | 0.9631 | 1.137503524  |
| Q9NS37    | ZHANG_HUMAN  | CREB/ATF bZIP transcription factor OS=Homo sapiens GN=CREBZF PE=1 SV=2                             | 0.9922 | 1.042644337  |
| Q96L96    | ALPK3_HUMAN  | Alpha-protein kinase 3 OS=Homo sapiens GN=ALPK3 PE=2 SV=2                                          | 0.985  | 1.021479727  |
| H7C4U7    | H7C4U7_HUMAN | Membrane-associated guanylate kinase                                                               | 0.9587 | 0.970853654  |
| P05997    | CO5A2_HUMAN  | Collagen alpha-2(V) chain OS=Homo sapiens GN=COL5A2 PE=1 SV=3                                      | 0.9781 | 0.963474124  |
| Q70Z35    | PREX2_HUMAN  | Phosphatidylinositol 3                                                                             | 0.9581 | 0.782408565  |
| P54802    | ANAG_HUMAN   | Alpha-N-acetylglucosaminidase OS=Homo sapiens GN=NAGLU PE=1 SV=2                                   | 0.9377 | 0.782408565  |
| Q9NYH9    | UTP6_HUMAN   | U3 small nucleolar RNA-associated protein 6 homolog OS=Homo sapiens GN=UTP6 PE=1 SV=2              | 0.9292 | 0.773996325  |
| P52789    | HXK2_HUMAN   | Hexokinase-2 OS=Homo sapiens GN=HK2 PE=1 SV=2                                                      | 0.9927 | 0.739848103  |
| H7C244    | H7C244_HUMAN | DDB1- and CUL4-associated factor 17 (Fragment) OS=Homo sapiens GN=DCAF17 PE=4 SV=1                 | 0.8418 | 0.739848103  |
| F5HQH8    | F5HQH8_HUMAN | WD repeat-containing protein 74 OS=Homo sapiens GN=WDR74 PE=4 SV=1                                 | 0.8979 | 0.669026766  |
| P12955-2  | PEPD_HUMAN   | Isoform 2 of Xaa-Pro dipeptidase OS=Homo sapiens GN=PEPD                                           | 1      | 0.632268215  |
| Q9NWZ5-4  | UCKL1_HUMAN  | Isoform 4 of Uridine-cytidine kinase-like 1 OS=Homo sapiens GN=UCKL1                               | 0.9511 | 0.604071324  |
| Q5TF21    | SOGA3_HUMAN  | Protein SOGA3 OS=Homo sapiens GN=SOGA3 PE=2 SV=1                                                   | 0.962  | 0.555816155  |
| P22680    | CPTA1_HUMAN  | Cholesterol 7-alpha-monooxygenase OS=Homo sapiens GN=CYP7A1 PE=1 SV=2                              | 0.9016 | 0.545968369  |
| J3KQD6    | J3KQD6_HUMAN | PWWP domain-containing protein MUM1 OS=Homo sapiens GN=MUM1 PE=4 SV=1                              | 0.9988 | 0.526068812  |
| P19623    | SPEE_HUMAN   | Spermidine synthase OS=Homo sapiens GN=SRM PE=1 SV=1                                               | 0.9999 | 0.495695163  |
| Q9Y5Y6    | ST14_HUMAN   | Suppressor of tumorigenicity 14 protein OS=Homo sapiens GN=ST14 PE=1 SV=2                          | 0.9593 | 0.495695163  |
| Q9UBG3    | CRNN_HUMAN   | Cornulin OS=Homo sapiens GN=CRNN PE=1 SV=1                                                         | 0.9976 | 0.485426827  |
| P09960-2  | LKHA4_HUMAN  | Isoform 2 of Leukotriene A-4 hydrolase OS=Homo sapiens GN=LTA4H                                    | 0.978  | 0.485426827  |
| Q9NTJ3-2  | SMC4_HUMAN   | Isoform 2 of Structural maintenance of chromosomes protein 4 OS=Homo sapiens GN=SMC4               | 1      | 0.475084883  |
| Q9BUL8    | PDC10_HUMAN  | Programmed cell death protein 10 OS=Homo sapiens GN=PDC10 PE=1 SV=1                                | 0.9998 | 0.475084883  |
| P43004-2  | EAA2_HUMAN   | Isoform 2 of Excitatory amino acid transporter 2 OS=Homo sapiens GN=SLC1A2                         | 0.9981 | 0.454175893  |
| O94903    | PROSC_HUMAN  | Proline synthase co-transcribed bacterial homolog protein OS=Homo sapiens GN=PROSC PE=1 SV=1       | 0.9999 | 0.443606651  |
| P55010    | IF5_HUMAN    | Eukaryotic translation initiation factor 5 OS=Homo sapiens GN=EIF5 PE=1 SV=2                       | 1      | 0.40053793   |
| P46459    | NSF_HUMAN    | Vesicle-fusing ATPase OS=Homo sapiens GN=NSF PE=1 SV=3                                             | 0.9997 | 0.40053793   |
| Q9Y5S9-2  | RBM8A_HUMAN  | Isoform 2 of RNA-binding protein 8A OS=Homo sapiens GN=RBM8A                                       | 0.9997 | 0.40053793   |

|          |              |                                                                                                    |        |             |
|----------|--------------|----------------------------------------------------------------------------------------------------|--------|-------------|
| A8MYV0   | DCDC2C_HUMAN | Doublecortin domain-containing protein 2C OS=Homo sapiens GN=DCDC2C PE=4 SV=3                      | 0.9838 | 0.40053793  |
| A9YTQ3-2 | AHRR_HUMAN   | Isoform 2 of Aryl hydrocarbon receptor repressor OS=Homo sapiens GN=AHRR                           | 0.9464 | 0.40053793  |
| P28290-2 | SSFA2_HUMAN  | Isoform 2 of Sperm-specific antigen 2 OS=Homo sapiens GN=SSFA2                                     | 0.9981 | 0.389566812 |
| P50225   | ST1A1_HUMAN  | Sulfotransferase 1A1 OS=Homo sapiens GN=SULT1A1 PE=1 SV=3                                          | 0.8414 | 0.367371066 |
| P40925-2 | MDHC_HUMAN   | Isoform 2 of Malate dehydrogenase                                                                  | 1      | 0.344828497 |
| Q14684-2 | RRP1B_HUMAN  | Isoform 2 of Ribosomal RNA processing protein 1 homolog B OS=Homo sapiens GN=RRP1B                 | 0.9999 | 0.344828497 |
| Q5VIR6-2 | VP53_HUMAN   | Isoform 2 of Vacuolar protein sorting-associated protein 53 homolog OS=Homo sapiens GN=VP53        | 0.9999 | 0.344828497 |
| Q16881-2 | TRXR1_HUMAN  | Isoform 2 of Thioredoxin reductase 1                                                               | 0.9996 | 0.333423734 |
| P28066   | PSA5_HUMAN   | Proteasome subunit alpha type-5 OS=Homo sapiens GN=PSMA5 PE=1 SV=3                                 | 1      | 0.298658316 |
| Q5VZU9   | Q5VZU9_HUMAN | Tripeptidyl peptidase II OS=Homo sapiens GN=TPP2 PE=2 SV=1                                         | 0.9999 | 0.298658316 |
| P31153   | METK2_HUMAN  | S-adenosylmethionine synthase isoform type-2 OS=Homo sapiens GN=MAT2A PE=1 SV=1                    | 0.9993 | 0.298658316 |
| B4E283   | B4E283_HUMAN | Apoptosis inhibitor 5 OS=Homo sapiens GN=API5 PE=2 SV=1                                            | 0.9979 | 0.298658316 |
| F8VWV3   | F8VWV3_HUMAN | Uncharacterized protein OS=Homo sapiens PE=4 SV=1                                                  | 0.989  | 0.298658316 |
| Q9Y238-2 | DLEC1_HUMAN  | Isoform 2 of Deleted in lung and esophageal cancer protein 1 OS=Homo sapiens GN=DLEC1              | 0.8871 | 0.286881148 |
| Q16352   | AINX_HUMAN   | Alpha-internexin OS=Homo sapiens GN=INA PE=1 SV=2                                                  | 1      | 0.275007047 |
| Q6P2E9   | EDC4_HUMAN   | Enhancer of mRNA-decapping protein 4 OS=Homo sapiens GN=EDC4 PE=1 SV=1                             | 1      | 0.275007047 |
| Q9BXJ9   | NAA15_HUMAN  | N-alpha-acetyltransferase 15                                                                       | 1      | 0.263034406 |
| P38432   | COIL_HUMAN   | Coilin OS=Homo sapiens GN=COIL PE=1 SV=1                                                           | 0.9475 | 0.263034406 |
| A2AB15   | A2AB15_HUMAN | DEAD/H (Asp-Glu-Ala-Asp/His) box polypeptide 16 (Fragment) OS=Homo sapiens GN=DHX16 PE=4 SV=       | 0.9305 | 0.263034406 |
| Q14669-2 | TRIP_C_HUMAN | Isoform 2 of E3 ubiquitin-protein ligase TRIP12 OS=Homo sapiens GN=TRIP12                          | 0.95   | 0.250961574 |
| P57088   | TMM33_HUMAN  | Transmembrane protein 33 OS=Homo sapiens GN=TMEM33 PE=1 SV=2                                       | 0.8531 | 0.250961574 |
| P42126-2 | ECI1_HUMAN   | Isoform 2 of Enoyl-CoA delta isomerase 1                                                           | 1      | 0.23878686  |
| P01111   | RASN_HUMAN   | GTPase NRas OS=Homo sapiens GN=NRAS PE=1 SV=1                                                      | 0.9998 | 0.23878686  |
| Q9NVP1   | DDX18_HUMAN  | ATP-dependent RNA helicase DDX18 OS=Homo sapiens GN=DDX18 PE=1 SV=2                                | 0.9997 | 0.23878686  |
| Q99583   | MNT_HUMAN    | Max-binding protein MNT OS=Homo sapiens GN=MNT PE=1 SV=1                                           | 0.9553 | 0.22650853  |
| Q71H61   | ILDR2_HUMAN  | Immunoglobulin-like domain-containing receptor 2 OS=Homo sapiens GN=ILDR2 PE=2 SV=1                | 0.9539 | 0.22650853  |
| Q9BQ39   | DDX50_HUMAN  | ATP-dependent RNA helicase DDX50 OS=Homo sapiens GN=DDX50 PE=1 SV=1                                | 0.8465 | 0.22650853  |
| P35637-2 | FUS_HUMAN    | Isoform Short of RNA-binding protein FUS OS=Homo sapiens GN=FUS                                    | 1      | 0.214124805 |
| Q8N684-2 | CPSF7_HUMAN  | Isoform 2 of Cleavage and polyadenylation specificity factor subunit 7 OS=Homo sapiens GN=CPSF7    | 1      | 0.214124805 |
| Q96NU0   | CNT3B_HUMAN  | Contactin-associated protein-like 3B OS=Homo sapiens GN=CNTNAP3B PE=2 SV=2                         | 0.958  | 0.201633861 |
| Q9NXG0-2 | CNTLN_HUMAN  | Isoform 2 of Centelin OS=Homo sapiens GN=CNTLN                                                     | 0.9529 | 0.201633861 |
| O75822   | EIF3J_HUMAN  | Eukaryotic translation initiation factor 3 subunit J OS=Homo sapiens GN=EIF3J PE=1 SV=2            | 0.9073 | 0.201633861 |
| Q99426   | TBCB_HUMAN   | Tubulin-folding cofactor B OS=Homo sapiens GN=TBCB PE=1 SV=2                                       | 1      | 0.189033824 |
| P46940   | IQGA1_HUMAN  | Ras GTPase-activating-like protein IQGAP1 OS=Homo sapiens GN=IQGAP1 PE=1 SV=1                      | 1      | 0.189033824 |
| Q12852   | M3K12_HUMAN  | Mitogen-activated protein kinase kinase kinase 12 OS=Homo sapiens GN=MAP3K12 PE=1 SV=2             | 0.9607 | 0.189033824 |
| Q01082-2 | SPTB2_HUMAN  | Isoform Short of Spectrin beta chain                                                               | 1      | 0.176322773 |
| Q3ZCQ8-2 | TIM50_HUMAN  | Isoform 2 of Mitochondrial import inner membrane translocase subunit TIM50 OS=Homo sapiens GN=TI   | 0.9995 | 0.176322773 |
| Q14151   | SAFB2_HUMAN  | Scaffold attachment factor B2 OS=Homo sapiens GN=SAFB2 PE=1 SV=1                                   | 0.9906 | 0.176322773 |
| Q86519-2 | CEL_HUMAN    | Isoform 2 of Protein CEI OS=Homo sapiens GN=C5orf38                                                | 0.9639 | 0.176322773 |
| P08579   | RU2B_HUMAN   | U2 small nuclear ribonucleoprotein B'' OS=Homo sapiens GN=SNRPB2 PE=1 SV=1                         | 1      | 0.163498732 |
| H0YKF0   | H0YKF0_HUMAN | Electron transfer flavoprotein subunit alpha                                                       | 0.949  | 0.150559677 |
| Q13428-3 | TCOF_HUMAN   | Isoform 3 of Treacle protein OS=Homo sapiens GN=TCOF1                                              | 1      | 0.150559677 |
| Q9Y310   | RTCB_HUMAN   | tRNA-splicing ligase RtcB homolog OS=Homo sapiens GN=C22orf28 PE=1 SV=1                            | 0.8764 | 0.150559677 |
| P38606   | VATA_HUMAN   | V-type proton ATPase catalytic subunit A OS=Homo sapiens GN=ATP6V1A PE=1 SV=2                      | 1      | 0.137503524 |
| Q96A49   | SYAP1_HUMAN  | Synapse-associated protein 1 OS=Homo sapiens GN=SYAP1 PE=1 SV=1                                    | 0.9972 | 0.137503524 |
| P36871   | PGM1_HUMAN   | Phosphoglucomutase-1 OS=Homo sapiens GN=PGM1 PE=1 SV=3                                             | 0.9949 | 0.137503524 |
| O15042-2 | SR140_HUMAN  | Isoform 2 of U2 snRNP-associated SURP motif-containing protein OS=Homo sapiens GN=U2SURP           | 0.9891 | 0.137503524 |
| Q96N67-2 | DOCK7_HUMAN  | Isoform 2 of Dedicator of cytokinesis protein 7 OS=Homo sapiens GN=DOCK7                           | 1      | 0.124328135 |
| P0CG47   | UBB_HUMAN    | Polyubiquitin-B OS=Homo sapiens GN=UBB PE=1 SV=1                                                   | 1      | 0.124328135 |
| P49756   | RBM25_HUMAN  | RNA-binding protein 25 OS=Homo sapiens GN=RBM25 PE=1 SV=3                                          | 1      | 0.124328135 |
| Q9UI26-2 | IPO11_HUMAN  | Isoform 2 of Importin-11 OS=Homo sapiens GN=IPO11                                                  | 1      | 0.124328135 |
| P62873   | GBB1_HUMAN   | Guanine nucleotide-binding protein G(I)/G(S)/G(T) subunit beta-1 OS=Homo sapiens GN=GNB1 PE=1 SV   | 0.9995 | 0.111031312 |
| Q9H583   | HEAT1_HUMAN  | HEAT repeat-containing protein 1 OS=Homo sapiens GN=HEATR1 PE=1 SV=3                               | 1      | 0.111031312 |
| Q6ZU80   | CE128_HUMAN  | Centrosomal protein of 128 kDa OS=Homo sapiens GN=CEP128 PE=1 SV=2                                 | 0.9996 | 0.111031312 |
| Q96176-5 | MMS19_HUMAN  | Isoform 4 of MMS19 nucleotide excision repair protein homolog OS=Homo sapiens GN=MMS19             | 0.9997 | 0.111031312 |
| P48029-2 | SC6A8_HUMAN  | Isoform 2 of Sodium- and chloride-dependent creatine transporter 1 OS=Homo sapiens GN=SLC6A8       | 0.8973 | 0.111031312 |
| O00541-2 | PESC_HUMAN   | Isoform 2 of Pescadillo homolog OS=Homo sapiens GN=PES1                                            | 1      | 0.097610797 |
| P17858-2 | K6PL_HUMAN   | Isoform 2 of 6-phosphofructokinase                                                                 | 1      | 0.097610797 |
| Q8IY67-2 | RAVR1_HUMAN  | Isoform 2 of Ribonucleoprotein PTB-binding 1 OS=Homo sapiens GN=RAVER1                             | 0.9829 | 0.097610797 |
| Q9Y2X3   | NOP58_HUMAN  | Nucleolar protein 58 OS=Homo sapiens GN=NOP58 PE=1 SV=1                                            | 1      | 0.084064265 |
| Q9Y5L0-1 | TNPO3_HUMAN  | Isoform 1 of Transportin-3 OS=Homo sapiens GN=TNPO3                                                | 1      | 0.084064265 |
| Q8IVF4   | DYH10_HUMAN  | Dynein heavy chain 10                                                                              | 0.9144 | 0.084064265 |
| P78527   | PRKDC_HUMAN  | DNA-dependent protein kinase catalytic subunit OS=Homo sapiens GN=PRKDC PE=1 SV=3                  | 1      | 0.084064265 |
| Q9UHB9   | SRP68_HUMAN  | Signal recognition particle 68 kDa protein OS=Homo sapiens GN=SRP68 PE=1 SV=2                      | 0.9998 | 0.084064265 |
| O14617-2 | AP3D1_HUMAN  | Isoform 2 of AP-3 complex subunit delta-1 OS=Homo sapiens GN=AP3D1                                 | 0.9834 | 0.084064265 |
| Q6KB66-2 | K2C80_HUMAN  | Isoform 2 of Keratin                                                                               | 0.9632 | 0.084064265 |
| P48052   | CBPA2_HUMAN  | Carboxypeptidase A2 OS=Homo sapiens GN=CPA2 PE=1 SV=3                                              | 0.951  | 0.084064265 |
| Q5SXM2   | SNPC4_HUMAN  | snRNA-activating protein complex subunit 4 OS=Homo sapiens GN=SNAPC4 PE=1 SV=1                     | 0.9862 | 0.070389328 |
| O15260-2 | SURF4_HUMAN  | Isoform 2 of Surfeit locus protein 4 OS=Homo sapiens GN=SURF4                                      | 1      | 0.056583528 |
| Q92841-1 | DDX17_HUMAN  | Isoform 2 of Probable ATP-dependent RNA helicase DDX17 OS=Homo sapiens GN=DDX17                    | 0.9992 | 0.056583528 |
| P15153   | RAC2_HUMAN   | Ras-related C3 botulinum toxin substrate 2 OS=Homo sapiens GN=RAC2 PE=1 SV=1                       | 0.9991 | 0.056583528 |
| P35221   | CTNA1_HUMAN  | Catenin alpha-1 OS=Homo sapiens GN=CTNNA1 PE=1 SV=1                                                | 0.9973 | 0.056583528 |
| O43598   | RCL_HUMAN    | Deoxyribonucleoside 5'-monophosphate N-glycosidase OS=Homo sapiens GN=RCL PE=1 SV=1                | 0.9886 | 0.056583528 |
| P07954-2 | FUMH_HUMAN   | Isoform Cytoplasmic of Fumarate hydratase                                                          | 0.9793 | 0.056583528 |
| Q867C9-3 | MYPN_HUMAN   | Isoform 3 of Myopalladin OS=Homo sapiens GN=MYPN                                                   | 0.9362 | 0.056583528 |
| O00178   | GTPB1_HUMAN  | GTP-binding protein 1 OS=Homo sapiens GN=GTPBP1 PE=1 SV=3                                          | 0.9999 | 0.042644337 |
| P56537   | IF6_HUMAN    | Eukaryotic translation initiation factor 6 OS=Homo sapiens GN=EIF6 PE=1 SV=1                       | 0.9988 | 0.028569152 |
| P06730-2 | IF4E_HUMAN   | Isoform 2 of Eukaryotic translation initiation factor 4E OS=Homo sapiens GN=EIF4E                  | 0.9977 | 0.028569152 |
| Q5HY18   | RABL3_HUMAN  | Rab-like protein 3 OS=Homo sapiens GN=RABL3 PE=1 SV=1                                              | 0.9966 | 0.028569152 |
| Q9BW60   | ELOV1_HUMAN  | Elongation of very long chain fatty acids protein 1 OS=Homo sapiens GN=ELOVL1 PE=1 SV=1            | 0.8719 | 0.028569152 |
| P43487   | RANG_HUMAN   | Ran-specific GTPase-activating protein OS=Homo sapiens GN=RANBP1 PE=1 SV=1                         | 1      | 0.014355293 |
| O43707   | ACTN4_HUMAN  | Alpha-actinin-4 OS=Homo sapiens GN=ACTN4 PE=1 SV=2                                                 | 1      | 0.014355293 |
| E9PPF2   | E9PPF2_HUMAN | Non-receptor tyrosine-protein kinase TYK2 OS=Homo sapiens GN=TYK2 PE=4 SV=1                        | 0.9896 | 0.014355293 |
| Q9NYU2-2 | UGGG1_HUMAN  | Isoform 2 of UDP-glucose:glycoprotein glucosyltransferase 1 OS=Homo sapiens GN=UGGT1               | 1      | 0           |
| P46977   | STT3A_HUMAN  | Dolichyl-diphosphooligosaccharide--protein glycosyltransferase subunit STT3A OS=Homo sapiens GN=ST | 1      | 0           |
| P49368   | TCPG_HUMAN   | T-complex protein 1 subunit gamma OS=Homo sapiens GN=CCT3 PE=1 SV=4                                | 1      | 0           |
| Q6PKG0-3 | LARP1_HUMAN  | Isoform 2 of La-related protein 1 OS=Homo sapiens GN=LARP1                                         | 1      | 0           |
| Q9H3U1-2 | UN45A_HUMAN  | Isoform 2 of Protein unc-45 homolog A OS=Homo sapiens GN=UNC45A                                    | 1      | 0           |
| H3BPJ5   | H3BPJ5_HUMAN | Synaptogyrin-3 (Fragment) OS=Homo sapiens GN=SYNGR3 PE=4 SV=1                                      | 0.9989 | 0           |
| P28288-2 | ABCD3_HUMAN  | Isoform 2 of ATP-binding cassette sub-family D member 3 OS=Homo sapiens GN=ABCD3                   | 0.9943 | 0           |
| Q6UYE1-2 | LEU7_HUMAN   | Isoform 2 of Leukemia-associated protein 7 OS=Homo sapiens GN=DLEU7                                | 0.9359 | 0           |
| O43264   | ZW10_HUMAN   | Centromere/kinetochore protein zw10 homolog OS=Homo sapiens GN=ZW10 PE=1 SV=3                      | 1      | -0.01449957 |

|          |              |                                                                                                  |        |              |
|----------|--------------|--------------------------------------------------------------------------------------------------|--------|--------------|
| P35914   | HMGCL_HUMAN  | Hydroxymethylglutaryl-CoA lyase                                                                  | 1      | -0.01449957  |
| P52701   | MSH6_HUMAN   | DNA mismatch repair protein Msh6 OS=Homo sapiens GN=MSH6 PE=1 SV=2                               | 1      | -0.01449957  |
| E7ENF9   | E7ENF9_HUMAN | Isochorismatase domain-containing protein 1 (Fragment) OS=Homo sapiens GN=ISOC1 PE=4 SV=1        | 1      | -0.01449957  |
| H0Y2V6   | H0Y2V6_HUMAN | Centrosomal protein of 170 kDa (Fragment) OS=Homo sapiens GN=CEP170 PE=4 SV=1                    | 0.9997 | -0.01449957  |
| Q9UHX1-2 | PUF60_HUMAN  | Isoform 2 of Poly(U)-binding-splicing factor PUF60 OS=Homo sapiens GN=PUF60                      | 0.9982 | -0.01449957  |
| O43719   | HTSF1_HUMAN  | HIV Tat-specific factor 1 OS=Homo sapiens GN=HTATSF1 PE=1 SV=1                                   | 0.9939 | -0.01449957  |
| O94973-2 | AP2A2_HUMAN  | Isoform 2 of AP-2 complex subunit alpha-2 OS=Homo sapiens GN=AP2A2                               | 0.976  | -0.01449957  |
| Q5T0Z8   | CF132_HUMAN  | Uncharacterized protein C6orf132 OS=Homo sapiens GN=C6orf132 PE=1 SV=4                           | 0.9609 | -0.01449957  |
| P49454   | CENPF_HUMAN  | Centromere protein F OS=Homo sapiens GN=CENPF PE=1 SV=2                                          | 0.957  | -0.01449957  |
| O95433   | AHSA1_HUMAN  | Activator of 90 kDa heat shock protein ATPase homolog 1 OS=Homo sapiens GN=AHSA1 PE=1 SV=1       | 1      | -0.029146346 |
| Q9NPD3   | EXOS4_HUMAN  | Exosome complex component RRP41 OS=Homo sapiens GN=EXOSC4 PE=1 SV=3                              | 1      | -0.029146346 |
| P23919   | KTHY_HUMAN   | Thymidylate kinase OS=Homo sapiens GN=DTYMK PE=1 SV=4                                            | 0.9976 | -0.029146346 |
| O96000   | NDUBA_HUMAN  | NADH dehydrogenase [ubiquinone] 1 beta subcomplex subunit 10 OS=Homo sapiens GN=NDUBF10 PE=      | 0.9968 | -0.029146346 |
| Q8IYW5   | RN168_HUMAN  | E3 ubiquitin-protein ligase RNF168 OS=Homo sapiens GN=RNF168 PE=1 SV=1                           | 0.9941 | -0.029146346 |
| Q8WV44-2 | TR141_HUMAN  | Isoform 2 of E3 ubiquitin-protein ligase TRIM41 OS=Homo sapiens GN=TRIM41                        | 0.9724 | -0.029146346 |
| Q5JRA6-2 | MIA3_HUMAN   | Isoform 2 of Melanoma inhibitory activity protein 3 OS=Homo sapiens GN=MIA3                      | 1      | -0.043943348 |
| Q9NPR9   | GP108_HUMAN  | Protein GPR108 OS=Homo sapiens GN=GPR108 PE=2 SV=3                                               | 0.9949 | -0.043943348 |
| P50454   | SERPH_HUMAN  | Serpin H1 OS=Homo sapiens GN=SERPINH1 PE=1 SV=2                                                  | 0.9899 | -0.043943348 |
| O95934   | SPF27_HUMAN  | Pre-mRNA-splicing factor SPF27 OS=Homo sapiens GN=BCAS2 PE=1 SV=1                                | 0.9698 | -0.043943348 |
| O94826   | TOM70_HUMAN  | Mitochondrial import receptor subunit TOM70 OS=Homo sapiens GN=TOMM70A PE=1 SV=1                 | 1      | -0.058893689 |
| P04179-2 | SODM_HUMAN   | Isoform 2 of Superoxide dismutase [Mn]                                                           | 0.9999 | -0.058893689 |
| P19388   | RPAB1_HUMAN  | DNA-directed RNA polymerases I                                                                   | 0.9999 | -0.058893689 |
| Q60832   | DKC1_HUMAN   | H/ACA ribonucleoprotein complex subunit 4 OS=Homo sapiens GN=DKC1 PE=1 SV=3                      | 0.9999 | -0.058893689 |
| Q06203   | PUR1_HUMAN   | Amidophosphoribosyltransferase OS=Homo sapiens GN=PPAT PE=1 SV=1                                 | 0.9992 | -0.058893689 |
| P09661   | RU2A_HUMAN   | U2 small nuclear ribonucleoprotein A' OS=Homo sapiens GN=SNRPA1 PE=1 SV=2                        | 1      | -0.074005581 |
| O95292   | VAPB_HUMAN   | Vesicle-associated membrane protein-associated protein B/C OS=Homo sapiens GN=VAPB PE=1 SV=3     | 1      | -0.074005581 |
| G3V3W4   | G3V3W4_HUMAN | Proteasome subunit alpha type-3 OS=Homo sapiens GN=PSMA3 PE=4 SV=1                               | 0.809  | -0.074005581 |
| Q7L014   | DDX46_HUMAN  | Probable ATP-dependent RNA helicase DDX46 OS=Homo sapiens GN=DDX46 PE=1 SV=2                     | 1      | -0.074005581 |
| Q9NR28-2 | DBLOH_HUMAN  | Isoform 2 of Diablo homolog                                                                      | 1      | -0.074005581 |
| P58107   | EPIPL_HUMAN  | Epiplakin OS=Homo sapiens GN=EPPK1 PE=1 SV=2                                                     | 0.9956 | -0.074005581 |
| O60610-2 | DIAP1_HUMAN  | Isoform 2 of Protein diaphanous homolog 1 OS=Homo sapiens GN=DIAPH1                              | 0.9878 | -0.074005581 |
| Q15653-2 | IKBB_HUMAN   | Isoform 2 of NF-kappa-B inhibitor beta OS=Homo sapiens GN=NFKBIB                                 | 0.9648 | -0.074005581 |
| P05198   | IF2A_HUMAN   | Eukaryotic translation initiation factor 2 subunit 1 OS=Homo sapiens GN=EIF2S1 PE=1 SV=3         | 0.846  | -0.074005581 |
| Q13642-1 | FHL1_HUMAN   | Isoform 1 of Four and a half LIM domains protein 1 OS=Homo sapiens GN=FHL1                       | 1      | -0.089267338 |
| Q9NZ01-2 | TECR_HUMAN   | Isoform 2 of Trans-2                                                                             | 1      | -0.089267338 |
| P46109   | CRKL_HUMAN   | Crk-like protein OS=Homo sapiens GN=CRKL PE=1 SV=1                                               | 0.9987 | -0.089267338 |
| Q8WW12-2 | PCNP_HUMAN   | Isoform 2 of PEST proteolytic signal-containing nuclear protein OS=Homo sapiens GN=PCNP          | 0.9866 | -0.089267338 |
| Q8IZ81   | ELMD2_HUMAN  | ELMO domain-containing protein 2 OS=Homo sapiens GN=ELMOD2 PE=1 SV=1                             | 0.8824 | -0.089267338 |
| Q9NQW6-2 | ANLN_HUMAN   | Isoform 2 of Actin-binding protein anillin OS=Homo sapiens GN=ANLN                               | 0.8363 | -0.104697379 |
| Q15020-2 | SART3_HUMAN  | Isoform 2 of Squamous cell carcinoma antigen recognized by T-cells 3 OS=Homo sapiens GN=SART3    | 1      | -0.120294234 |
| O60762   | DPM1_HUMAN   | Dolichol-phosphate mannosyltransferase OS=Homo sapiens GN=DPM1 PE=1 SV=1                         | 1      | -0.120294234 |
| P00568   | KAD1_HUMAN   | Adenylyl kinase isoenzyme 1 OS=Homo sapiens GN=AK1 PE=1 SV=3                                     | 1      | -0.120294234 |
| P08237   | K6PF_HUMAN   | 6-phosphofructokinase                                                                            | 1      | -0.120294234 |
| P52272   | HNRPM_HUMAN  | Heterogeneous nuclear ribonucleoprotein M OS=Homo sapiens GN=HNRNPM PE=1 SV=3                    | 1      | -0.120294234 |
| A8MXQ7   | YH010_HUMAN  | Putative IQ motif and ankyrin repeat domain-containing protein LOC642574 OS=Homo sapiens PE=5 SV | 0.9961 | -0.120294234 |
| E9PBQ3   | E9PBQ3_HUMAN | Uncharacterized protein OS=Homo sapiens PE=4 SV=1                                                | 0.9912 | -0.120294234 |
| Q9P2D3-2 | HTRS5_HUMAN  | Isoform 2 of HEAT repeat-containing protein 5B OS=Homo sapiens GN=HEATR5B                        | 0.989  | -0.120294234 |
| Q9HOH3   | ENC2_HUMAN   | Ectoderm-neural cortex protein 2 OS=Homo sapiens GN=KLHL25 PE=2 SV=1                             | 0.8885 | -0.120294234 |
| P51659   | DHB4_HUMAN   | Peroxisomal multifunctional enzyme type 2 OS=Homo sapiens GN=HSD17B4 PE=1 SV=3                   | 0.8845 | -0.120294234 |
| P28070   | PSB4_HUMAN   | Proteasome subunit beta type-4 OS=Homo sapiens GN=PSMB4 PE=1 SV=4                                | 1      | -0.13606155  |
| P48147   | PPCE_HUMAN   | Prolyl endopeptidase OS=Homo sapiens GN=PREP PE=1 SV=2                                           | 1      | -0.13606155  |
| Q13126-2 | MTAP_HUMAN   | Isoform 2 of S-methyl-5'-thioadenosine phosphorylase OS=Homo sapiens GN=MTAP                     | 1      | -0.13606155  |
| Q9Y285   | SYFA_HUMAN   | Phenylalanine--tRNA ligase alpha subunit OS=Homo sapiens GN=FARSA PE=1 SV=3                      | 0.9999 | -0.13606155  |
| Q96AC1-2 | FERM2_HUMAN  | Isoform 2 of Fermitin family homolog 2 OS=Homo sapiens GN=FERMT2                                 | 0.9996 | -0.13606155  |
| Q53EL6   | PDCC4_HUMAN  | Programmed cell death protein 4 OS=Homo sapiens GN=PDCC4 PE=1 SV=2                               | 0.9973 | -0.13606155  |
| O95071   | UBR5_HUMAN   | E3 ubiquitin-protein ligase UBR5 OS=Homo sapiens GN=UBR5 PE=1 SV=2                               | 0.9906 | -0.13606155  |
| Q9NQJ5   | PAK6_HUMAN   | Serine/threonine-protein kinase PAK 6 OS=Homo sapiens GN=PAK6 PE=1 SV=1                          | 0.985  | -0.13606155  |
| P61599   | NAA20_HUMAN  | N-alpha-acetyltransferase 20 OS=Homo sapiens GN=NAA20 PE=1 SV=1                                  | 0.981  | -0.13606155  |
| P62829   | RL23_HUMAN   | 60S ribosomal protein L23 OS=Homo sapiens GN=RPL23 PE=1 SV=1                                     | 1      | -0.152003093 |
| Q9NTK5   | OLA1_HUMAN   | Obg-like ATPase 1 OS=Homo sapiens GN=OLA1 PE=1 SV=2                                              | 1      | -0.152003093 |
| Q92575   | UBXN4_HUMAN  | UBX domain-containing protein 4 OS=Homo sapiens GN=UBXN4 PE=1 SV=2                               | 0.9969 | -0.152003093 |
| P33316-2 | DUT_HUMAN    | Isoform 2 of Deoxyuridine 5'-triphosphate nucleotidohydrolase                                    | 1      | -0.168122759 |
| P67936-2 | TPM4_HUMAN   | Isoform 2 of Tropomyosin alpha-4 chain OS=Homo sapiens GN=TPM4                                   | 0.9998 | -0.168122759 |
| Q14353   | GAMT_HUMAN   | Guanidinoacetate N-methyltransferase OS=Homo sapiens GN=GAMT PE=1 SV=1                           | 0.9882 | -0.168122759 |
| Q9NTN9-2 | SEM4G_HUMAN  | Isoform 2 of Semaphorin-4G OS=Homo sapiens GN=SEMA4G                                             | 0.9193 | -0.168122759 |
| P26038   | MOES_HUMAN   | Moesin OS=Homo sapiens GN=MSN PE=1 SV=3                                                          | 1      | -0.184424571 |
| P46379-2 | BAG6_HUMAN   | Isoform 2 of Large proline-rich protein BAG6 OS=Homo sapiens GN=BAG6                             | 1      | -0.184424571 |
| Q15393   | SF3B3_HUMAN  | Splicing factor 3B subunit 3 OS=Homo sapiens GN=SF3B3 PE=1 SV=4                                  | 1      | -0.184424571 |
| Q8N1F7   | NUP93_HUMAN  | Nuclear pore complex protein Nup93 OS=Homo sapiens GN=NUP93 PE=1 SV=2                            | 1      | -0.184424571 |
| O14925   | TIM23_HUMAN  | Mitochondrial import inner membrane translocase subunit Tim23 OS=Homo sapiens GN=TIMM23 PE=1     | 0.999  | -0.184424571 |
| Q8N7B9   | EFCB3_HUMAN  | EF-hand calcium-binding domain-containing protein 3 OS=Homo sapiens GN=EFCAB3 PE=1 SV=1          | 0.974  | -0.184424571 |
| Q9NWX5-2 | ECHD1_HUMAN  | Isoform 2 of Ethylmalonyl-CoA decarboxylase OS=Homo sapiens GN=ECHDC1                            | 0.8136 | -0.184424571 |
| P30838   | AL3A1_HUMAN  | Aldehyde dehydrogenase                                                                           | 0.8008 | -0.184424571 |
| Q6Y1H2   | HACD2_HUMAN  | 3-hydroxyacyl-CoA dehydratase 2 OS=Homo sapiens GN=PTPLB PE=1 SV=1                               | 1      | -0.200912694 |
| O00461   | GOL14_HUMAN  | Golgi integral membrane protein 4 OS=Homo sapiens GN=GOLIM4 PE=1 SV=1                            | 0.9984 | -0.200912694 |
| O14813   | PHX2A_HUMAN  | Paired mesoderm homeobox protein 2A OS=Homo sapiens GN=PHOX2A PE=1 SV=2                          | 0.9779 | -0.200912694 |
| F5GZT1   | F5GZT1_HUMAN | Exocyst complex component 4 OS=Homo sapiens GN=EXOC4 PE=4 SV=1                                   | 0.9644 | -0.200912694 |
| Q9UID3   | VPS51_HUMAN  | Vacuolar protein sorting-associated protein 51 homolog OS=Homo sapiens GN=VPS51 PE=1 SV=2        | 1      | -0.217591435 |
| O75116   | ROCK2_HUMAN  | Rho-associated protein kinase 2 OS=Homo sapiens GN=ROCK2 PE=1 SV=4                               | 0.9352 | -0.217591435 |
| Q14676-2 | MDC1_HUMAN   | Isoform 2 of Mediator of DNA damage checkpoint protein 1 OS=Homo sapiens GN=MDC1                 | 0.9998 | -0.217591435 |
| Q8N1G0   | ZN687_HUMAN  | Zinc finger protein 687 OS=Homo sapiens GN=ZNF687 PE=1 SV=1                                      | 0.9997 | -0.217591435 |
| Q9H330   | TM245_HUMAN  | Transmembrane protein 245 OS=Homo sapiens GN=TMEM245 PE=1 SV=2                                   | 0.9476 | -0.217591435 |
| O15523   | DDX3Y_HUMAN  | ATP-dependent RNA helicase DDX3Y OS=Homo sapiens GN=DDX3Y PE=1 SV=2                              | 0.9307 | -0.234465254 |
| P00387-2 | NB5R3_HUMAN  | Isoform 2 of NADH-cytochrome b5 reductase 3 OS=Homo sapiens GN=CYB5R3                            | 1      | -0.234465254 |
| Q8TAQ2-2 | SMRCC2_HUMAN | Isoform 2 of SWI/SNF complex subunit SMARCC2 OS=Homo sapiens GN=SMARCC2                          | 0.9998 | -0.234465254 |
| Q9H7Z7   | PGES2_HUMAN  | Prostaglandin E synthase 2 OS=Homo sapiens GN=PTGES2 PE=1 SV=1                                   | 0.9996 | -0.234465254 |
| O15085-2 | ARHGB_HUMAN  | Isoform 2 of Rho guanine nucleotide exchange factor 11 OS=Homo sapiens GN=ARHGEF11               | 0.9993 | -0.234465254 |
| Q5UIP0-2 | RIF1_HUMAN   | Isoform 2 of Telomere-associated protein RIF1 OS=Homo sapiens GN=RIF1                            | 0.9982 | -0.234465254 |
| Q6YFQ2   | CX6B2_HUMAN  | Cytochrome c oxidase subunit 6B2 OS=Homo sapiens GN=COX6B2 PE=2 SV=1                             | 0.9863 | -0.234465254 |
| Q9Y314   | NOSIP_HUMAN  | Nitric oxide synthase-interacting protein OS=Homo sapiens GN=NOSIP PE=1 SV=1                     | 0.9718 | -0.234465254 |
| O00425   | IF2B3_HUMAN  | Insulin-like growth factor 2 mRNA-binding protein 3 OS=Homo sapiens GN=IGF2BP3 PE=1 SV=2         | 1      | -0.251538767 |
| O14773-2 | TPP1_HUMAN   | Isoform 2 of Tripeptidyl-peptidase 1 OS=Homo sapiens GN=TPP1                                     | 0.999  | -0.251538767 |

|           |              |                                                                                                      |        |              |
|-----------|--------------|------------------------------------------------------------------------------------------------------|--------|--------------|
| P48681    | NEST_HUMAN   | Nestin OS=Homo sapiens GN=NES PE=1 SV=2                                                              | 0.9943 | -0.251538767 |
| P42858    | HD_HUMAN     | Huntingtin OS=Homo sapiens GN=HTT PE=1 SV=2                                                          | 0.9929 | -0.251538767 |
| P06748-2  | NPM_HUMAN    | Isoform 2 of Nucleophosmin OS=Homo sapiens GN=NPM1                                                   | 1      | -0.268816758 |
| Q8NCW5-2  | NNRE_HUMAN   | Isoform 2 of NAD(P)H-hydrate epimerase OS=Homo sapiens GN=APOA1BP                                    | 1      | -0.268816758 |
| Q9Y5Y2    | NUBP2_HUMAN  | Cytosolic Fe-S cluster assembly factor NUBP2 OS=Homo sapiens GN=NUBP2 PE=1 SV=1                      | 0.9996 | -0.268816758 |
| O95359-3  | TACC2_HUMAN  | Isoform 3 of Transforming acidic coiled-coil-containing protein 2 OS=Homo sapiens GN=TACC2           | 0.9976 | -0.268816758 |
| P00846    | ATP6_HUMAN   | ATP synthase subunit a OS=Homo sapiens GN=MT-ATP6 PE=1 SV=1                                          | 0.9935 | -0.268816758 |
| P23588    | IF4B_HUMAN   | Eukaryotic translation initiation factor 4B OS=Homo sapiens GN=EIF4B PE=1 SV=2                       | 0.9883 | -0.268816758 |
| Q68CR1-2  | SEL13_HUMAN  | Isoform 2 of Protein sel-1 homolog 3 OS=Homo sapiens GN=SEL13                                        | 0.9678 | -0.268816758 |
| P48741    | HSP77_HUMAN  | Putative heat shock 70 kDa protein 7 OS=Homo sapiens GN=HSPA7 PE=5 SV=2                              | 0.9975 | -0.286304185 |
| Q93009    | UBP7_HUMAN   | Ubiquitin carboxyl-terminal hydrolase 7 OS=Homo sapiens GN=USP7 PE=1 SV=2                            | 1      | -0.286304185 |
| G3XAB4    | G3XAB4_HUMAN | Acetyl-CoA acetyltransferase                                                                         | 1      | -0.286304185 |
| Q9HQ00    | FA49A_HUMAN  | Protein FAM49A OS=Homo sapiens GN=FAM49A PE=1 SV=1                                                   | 0.9996 | -0.286304185 |
| P59998    | ARPC4_HUMAN  | Actin-related protein 2/3 complex subunit 4 OS=Homo sapiens GN=ARPC4 PE=1 SV=3                       | 0.9993 | -0.286304185 |
| Q9NVU7-2  | SDA1_HUMAN   | Isoform 2 of Protein SDA1 homolog OS=Homo sapiens GN=SDAD1                                           | 0.9437 | -0.286304185 |
| Q9NRG7-2  | D39U1_HUMAN  | Isoform 2 of Epimerase family protein SDR39U1 OS=Homo sapiens GN=SDR39U1                             | 0.8994 | -0.286304185 |
| Q3L8U1-2  | CHD9_HUMAN   | Isoform 2 of Chromodomain-helicase-DNA-binding protein 9 OS=Homo sapiens GN=CHD9                     | 0.9916 | -0.304006187 |
| Q5VYK3    | ECM29_HUMAN  | Proteasome-associated protein ECM29 homolog OS=Homo sapiens GN=ECM29 PE=1 SV=2                       | 1      | -0.304006187 |
| Q8WYA6-2  | CTBL1_HUMAN  | Isoform 2 of Beta-catenin-like protein 1 OS=Homo sapiens GN=CTNBL1                                   | 0.9912 | -0.304006187 |
| F2Z2N4    | F2Z2N4_HUMAN | Putative uncharacterized protein C1orf213 OS=Homo sapiens GN=C1orf213 PE=4 SV=1                      | 0.9522 | -0.304006187 |
| Q9NZA1-2  | CLIC5_HUMAN  | Isoform 1 of Chloride intracellular channel protein 5 OS=Homo sapiens GN=CLIC5                       | 0.9543 | -0.321928095 |
| Q99733    | NP1L4_HUMAN  | Nucleosome assembly protein 1-like 4 OS=Homo sapiens GN=NP1L4 PE=1 SV=1                              | 1      | -0.321928095 |
| Q8N4F7    | RN175_HUMAN  | RING finger protein 175 OS=Homo sapiens GN=RN175 PE=2 SV=2                                           | 0.9888 | -0.321928095 |
| P04216    | THY1_HUMAN   | Thy-1 membrane glycoprotein OS=Homo sapiens GN=THY1 PE=1 SV=2                                        | 0.8085 | -0.321928095 |
| P26640    | SYVC_HUMAN   | Valine-tRNA ligase OS=Homo sapiens GN=VAR5 PE=1 SV=4                                                 | 1      | -0.340075442 |
| P36543-2  | VATE1_HUMAN  | Isoform 2 of V-type proton ATPase subunit E 1 OS=Homo sapiens GN=ATP6V1E1                            | 0.9992 | -0.340075442 |
| P61011-2  | SRP54_HUMAN  | Isoform 2 of Signal recognition particle 54 kDa protein OS=Homo sapiens GN=SRP54                     | 0.9988 | -0.340075442 |
| Q96FW1    | OTUB1_HUMAN  | Ubiquitin thioesterase OTUB1 OS=Homo sapiens GN=OTUB1 PE=1 SV=2                                      | 1      | -0.358453971 |
| Q96552-2  | PIGS_HUMAN   | Isoform 2 of GPI transamidase component PIG-S OS=Homo sapiens GN=PIGS                                | 0.9997 | -0.358453971 |
| Q7Z333-3  | SETX_HUMAN   | Isoform 3 of Probable helicase senataxin OS=Homo sapiens GN=SETX                                     | 0.9992 | -0.358453971 |
| P21964-2  | COMT_HUMAN   | Isoform Soluble of Catechol O-methyltransferase OS=Homo sapiens GN=COMT                              | 0.9816 | -0.358453971 |
| Q9Y3E0    | GOT1B_HUMAN  | Vesicle transport protein GOT1B OS=Homo sapiens GN=GOT1B PE=1 SV=1                                   | 0.9218 | -0.358453971 |
| Q16543    | CDC37_HUMAN  | Hsp90 co-chaperone Cdc37 OS=Homo sapiens GN=CDC37 PE=1 SV=1                                          | 0.8947 | -0.358453971 |
| Q5VTL8-2  | PR38B_HUMAN  | Isoform 2 of Pre-mRNA-splicing factor 38B OS=Homo sapiens GN=PRPF38B                                 | 0.835  | -0.377069649 |
| P13804    | ETFA_HUMAN   | Electron transfer flavoprotein subunit alpha                                                         | 1      | -0.395928676 |
| Q01484    | ANK2_HUMAN   | Ankyrin-2 OS=Homo sapiens GN=ANK2 PE=1 SV=4                                                          | 0.9992 | -0.395928676 |
| O14524-2  | T194A_HUMAN  | Isoform 2 of Transmembrane protein 194A OS=Homo sapiens GN=TMEM194A                                  | 0.9903 | -0.395928676 |
| P10768    | ESTD_HUMAN   | S-formylglutathione hydrolase OS=Homo sapiens GN=ESD PE=1 SV=2                                       | 1      | -0.415037499 |
| P24941-2  | CDK2_HUMAN   | Isoform 2 of Cyclin-dependent kinase 2 OS=Homo sapiens GN=CDK2                                       | 1      | -0.415037499 |
| Q8WXH0-2  | SYNE2_HUMAN  | Isoform 2 of Nesprin-2 OS=Homo sapiens GN=SYNE2                                                      | 0.9997 | -0.415037499 |
| Q14774    | HLX_HUMAN    | H2.0-like homeobox protein OS=Homo sapiens GN=HLX PE=1 SV=3                                          | 0.9677 | -0.415037499 |
| Q9P265    | DIP2B_HUMAN  | Disco-interacting protein 2 homolog B OS=Homo sapiens GN=DIP2B PE=1 SV=3                             | 1      | -0.434402824 |
| P49915    | GUA4_HUMAN   | GMP synthase [glutamine-hydrolyzing] OS=Homo sapiens GN=GMPS PE=1 SV=1                               | 1      | -0.434402824 |
| Q6UY18    | LIGO4_HUMAN  | Leucine-rich repeat and immunoglobulin-like domain-containing nogo receptor-interacting protein 4 OS | 0.9466 | -0.434402824 |
| O75691    | UTP20_HUMAN  | Small subunit processome component 20 homolog OS=Homo sapiens GN=UTP20 PE=1 SV=3                     | 1      | -0.454031631 |
| P11233    | RALA_HUMAN   | Ras-related protein Ral-A OS=Homo sapiens GN=RALA PE=1 SV=1                                          | 0.9996 | -0.454031631 |
| P53814-5  | SMTN_HUMAN   | Isoform B2 of Smoothelin OS=Homo sapiens GN=SMTN                                                     | 0.9987 | -0.454031631 |
| P10515    | ODP2_HUMAN   | Dihydropyridyllysine-residue acetyltransferase component of pyruvate dehydrogenase complex           | 1      | -0.473931188 |
| Q8IY57-2  | YAF2_HUMAN   | Isoform 1 of YY1-associated factor 2 OS=Homo sapiens GN=YAF2                                         | 0.9924 | -0.473931188 |
| Q6SPF0    | SAMD1_HUMAN  | Atherin OS=Homo sapiens GN=SAMD1 PE=1 SV=1                                                           | 0.8996 | -0.473931188 |
| P13942-2  | COBA2_HUMAN  | Isoform 2 of Collagen alpha-2(XI) chain OS=Homo sapiens GN=COL11A2                                   | 0.9643 | -0.49410907  |
| Q86XL3-2  | ANKL2_HUMAN  | Isoform 2 of Ankyrin repeat and LEM domain-containing protein 2 OS=Homo sapiens GN=ANKL2             | 0.9312 | -0.49410907  |
| Q9BZX2-2  | UCK2_HUMAN   | Isoform 2 of Uridine-cytidine kinase 2 OS=Homo sapiens GN=UCK2                                       | 0.9998 | -0.535331733 |
| Q8TEQ8    | PIGO_HUMAN   | GPI ethanolamine phosphate transferase 3 OS=Homo sapiens GN=PIGO PE=2 SV=3                           | 0.9992 | -0.556393349 |
| Q96ND0    | F210A_HUMAN  | Protein FAM210A OS=Homo sapiens GN=FAM210A PE=1 SV=2                                                 | 0.995  | -0.556393349 |
| P35222-2  | CTNBN1_HUMAN | Isoform 2 of Catenin beta-1 OS=Homo sapiens GN=CTNBN1                                                | 0.992  | -0.577766999 |
| Q8WWY3-2  | PRP31_HUMAN  | Isoform 2 of U4/U6 small nuclear ribonucleoprotein Prp31 OS=Homo sapiens GN=PRPF31                   | 0.8046 | -0.577766999 |
| Q96RP9-2  | EFGM_HUMAN   | Isoform 2 of Elongation factor G                                                                     | 0.9959 | -0.59946207  |
| Q68D10-2  | SPT2_HUMAN   | Isoform 2 of Protein SPT2 homolog OS=Homo sapiens GN=SPTY2D1                                         | 0.9965 | -0.59946207  |
| F8VRG5    | F8VRG5_HUMAN | Protein C12orf52 OS=Homo sapiens GN=C12orf52 PE=4 SV=1                                               | 0.979  | -0.59946207  |
| Q9NSB4    | KRT82_HUMAN  | Keratin                                                                                              | 0.8531 | -0.621488377 |
| Q8TEM1    | PO210_HUMAN  | Nuclear pore membrane glycoprotein 210 OS=Homo sapiens GN=NUP210 PE=1 SV=3                           | 1      | -0.64385619  |
| O75431    | MTX2_HUMAN   | Metaxin-2 OS=Homo sapiens GN=MTX2 PE=1 SV=1                                                          | 0.9997 | -0.64385619  |
| P04792    | HSPB1_HUMAN  | Heat shock protein beta-1 OS=Homo sapiens GN=HSPB1 PE=1 SV=2                                         | 0.9988 | -0.64385619  |
| Q8IUG5    | MYO18B_HUMAN | Unconventional myosin-XVIIIb OS=Homo sapiens GN=MYO18B PE=1 SV=1                                     | 0.9952 | -0.64385619  |
| P36915-2  | GNL1_HUMAN   | Isoform 2 of Guanine nucleotide-binding protein-like 1 OS=Homo sapiens GN=GNL1                       | 0.9808 | -0.64385619  |
| Q5CZC0    | FSIP2_HUMAN  | Fibrous sheath-interacting protein 2 OS=Homo sapiens GN=FSIP2 PE=1 SV=4                              | 0.9579 | -0.64385619  |
| O00567    | NOP56_HUMAN  | Nucleolar protein 56 OS=Homo sapiens GN=NOP56 PE=1 SV=4                                              | 0.9999 | -0.666576266 |
| Q7L1Q6-2  | BZW1_HUMAN   | Isoform 2 of Basic leucine zipper and W2 domain-containing protein 1 OS=Homo sapiens GN=BZW1         | 0.9993 | -0.666576266 |
| Q14393-2  | GAS6_HUMAN   | Isoform 2 of Growth arrest-specific protein 6 OS=Homo sapiens GN=GAS6                                | 0.9987 | -0.666576266 |
| Q8WZ42-11 | TITIN_HUMAN  | Isoform 11 of Titin OS=Homo sapiens GN=TTN                                                           | 1      | -0.689659879 |
| Q13492-2  | PICALM_HUMAN | Isoform 2 of Phosphatidylinositol-binding clathrin assembly protein OS=Homo sapiens GN=PICALM        | 0.9983 | -0.689659879 |
| Q99961    | SH3G1_HUMAN  | Endophilin-A2 OS=Homo sapiens GN=SH3GL1 PE=1 SV=1                                                    | 0.9942 | -0.689659879 |
| Q8TE73    | DYH5_HUMAN   | Dynein heavy chain 5                                                                                 | 0.8932 | -0.713118852 |
| Q9UPT8    | ZC3H4_HUMAN  | Zinc finger CCCH domain-containing protein 4 OS=Homo sapiens GN=ZC3H4 PE=1 SV=3                      | 0.9983 | -0.713118852 |
| P21912    | DHSB_HUMAN   | Succinate dehydrogenase [ubiquinone] iron-sulfur subunit                                             | 1      | -0.736965594 |
| O75947-2  | ATP5H_HUMAN  | Isoform 2 of ATP synthase subunit d                                                                  | 1      | -0.736965594 |
| P41091    | IF2G_HUMAN   | Eukaryotic translation initiation factor 2 subunit 3 OS=Homo sapiens GN=EIF2S3 PE=1 SV=3             | 0.9167 | -0.76121314  |
| P50993    | AT1A2_HUMAN  | Sodium/potassium-transporting ATPase subunit alpha-2 OS=Homo sapiens GN=ATP1A2 PE=1 SV=1             | 0.8199 | -0.785875195 |
| O60333-3  | KIF1B_HUMAN  | Isoform 3 of Kinesin-like protein KIF1B OS=Homo sapiens GN=KIF1B                                     | 0.9904 | -0.785875195 |
| P25100    | ADA1D_HUMAN  | Alpha-1D adrenergic receptor OS=Homo sapiens GN=ADRA1D PE=2 SV=2                                     | 0.9381 | -0.810966176 |
| Q9BW71    | HIRP3_HUMAN  | HIRA-interacting protein 3 OS=Homo sapiens GN=HIRP3 PE=1 SV=3                                        | 0.9935 | -0.862496476 |
| Q9Y696    | CLIC4_HUMAN  | Chloride intracellular channel protein 4 OS=Homo sapiens GN=CLIC4 PE=1 SV=4                          | 1      | -0.888968688 |
| Q15120-2  | PKD3_HUMAN   | Isoform 2 of [Pyruvate dehydrogenase (lipoamide)] kinase isozyme 3                                   | 0.985  | -0.888968688 |
| P05177-2  | CP1A2_HUMAN  | Isoform 2 of Cytochrome P450 1A2 OS=Homo sapiens GN=CYP1A2                                           | 0.9085 | -0.888968688 |
| P06493-2  | CDK1_HUMAN   | Isoform 2 of Cyclin-dependent kinase 1 OS=Homo sapiens GN=CDK1                                       | 0.9979 | -0.943416472 |
| Q9Y4G2    | PKHM1_HUMAN  | Pleckstrin homology domain-containing family M member 1 OS=Homo sapiens GN=PLEKHM1 PE=1 SV=1         | 0.9994 | -0.971430848 |
| O94988    | FA13A_HUMAN  | Protein FAM13A OS=Homo sapiens GN=FAM13A PE=1 SV=2                                                   | 0.9093 | -0.971430848 |
| Q9Y4W6    | AFG32_HUMAN  | AFG32-like protein 2 OS=Homo sapiens GN=AFG32L PE=1 SV=2                                             | 0.9746 | -0.971430848 |
| Q32MK0-4  | MYLK3_HUMAN  | Isoform 2 of Myosin light chain kinase 3 OS=Homo sapiens GN=MYLK3                                    | 0.9564 | -1.029146346 |
| Q15113    | PCOC1_HUMAN  | Procollagen C-endopeptidase enhancer 1 OS=Homo sapiens GN=PCOLCE PE=1 SV=2                           | 0.919  | -1.058893689 |
| P48058    | GRIA4_HUMAN  | Glutamate receptor 4 OS=Homo sapiens GN=GRIA4 PE=2 SV=2                                              | 0.9421 | -1.089267338 |



|           |               |                                                                                                    |        |              |
|-----------|---------------|----------------------------------------------------------------------------------------------------|--------|--------------|
| Q9NRE2    | TSH2_HUMAN    | Teashirt homolog 2 OS=Homo sapiens GN=TSHZ2 PE=1 SV=3                                              | 0.9998 | -1.120294234 |
| P26358-2  | DNMT1_HUMAN   | Isoform 2 of DNA (cytosine-5)-methyltransferase 1 OS=Homo sapiens GN=DNMT1                         | 0.9988 | -1.120294234 |
| Q14117    | DPYS_HUMAN    | Dihydropyrimidinase OS=Homo sapiens GN=DPYS PE=1 SV=1                                              | 0.9519 | -1.120294234 |
| P31146    | COR1A_HUMAN   | Coronin-1A OS=Homo sapiens GN=CORO1A PE=1 SV=4                                                     | 0.9318 | -1.120294234 |
| P60953    | CDC42_HUMAN   | Cell division control protein 42 homolog OS=Homo sapiens GN=CDC42 PE=1 SV=2                        | 1      | -1.152003093 |
| P54727    | RD23B_HUMAN   | UV excision repair protein RAD23 homolog B OS=Homo sapiens GN=RD23B PE=1 SV=1                      | 1      | -1.152003093 |
| H3BQ73    | H3BQ73_HUMAN  | Vacuolar fusion protein MON1 homolog B OS=Homo sapiens GN=MON1B PE=4 SV=1                          | 0.9718 | -1.152003093 |
| Q9HCK1    | ZDBF2_HUMAN   | DBF4-type zinc finger-containing protein 2 OS=Homo sapiens GN=ZDBF2 PE=1 SV=3                      | 0.9656 | -1.152003093 |
| Q969Y2-2  | GTPB3_HUMAN   | Isoform 2 of tRNA modification GTPase GTPBP3                                                       | 0.9693 | -1.184424571 |
| Q01954    | BNC1_HUMAN    | Zinc finger protein basonuclin-1 OS=Homo sapiens GN=BNC1 PE=1 SV=2                                 | 0.9996 | -1.217591435 |
| A4D212    | A4D212_HUMAN  | DKFZP586J0619 protein OS=Homo sapiens GN=DKFZP586J0619 PE=4 SV=1                                   | 0.9994 | -1.217591435 |
| Q9BZF9    | UACA_HUMAN    | Uveal autoantigen with coiled-coil domains and ankyrin repeats OS=Homo sapiens GN=UACA PE=1 SV=    | 0.9879 | -1.251538767 |
| P14618    | KPYM_HUMAN    | Pyruvate kinase isozymes M1/M2 OS=Homo sapiens GN=PKM PE=1 SV=4                                    | 1      | -1.395928676 |
| Q9UPN3-2  | MACF1_HUMAN   | Isoform 2 of Microtubule-actin cross-linking factor 1                                              | 0.9997 | -1.434402824 |
| O60741    | HCN1_HUMAN    | Potassium/sodium hyperpolarization-activated cyclic nucleotide-gated channel 1 OS=Homo sapiens GN= | 0.9911 | -1.556393349 |
| P46013-2  | KI67_HUMAN    | Isoform Short of Antigen KI-67 OS=Homo sapiens GN=MKI67                                            | 1      | -1.736965594 |
| E7EX42    | E7EX42_HUMAN  | Pancreatic lipase-related protein 1 OS=Homo sapiens GN=PNLIPRP1 PE=4 SV=1                          | 0.9121 | -1.736965594 |
| Q14934-14 | NFAC4_HUMAN   | Isoform 14 of Nuclear factor of activated T-cells                                                  | 0.95   | -1.785875195 |
| Q9Y281    | COF2_HUMAN    | Cofilin-2 OS=Homo sapiens GN=CFL2 PE=1 SV=1                                                        | 0.9898 | -1.888968688 |
| Q8NDA2    | HMCN2_HUMAN   | Hemicentin-2 OS=Homo sapiens GN=HMCN2 PE=2 SV=2                                                    | 0.9901 | -1.888968688 |
| Q9Y261-2  | FOXA2_HUMAN   | Isoform 2 of Hepatocyte nuclear factor 3-beta OS=Homo sapiens GN=FOXA2                             | 0.9993 | -2           |
| Q8NHY3    | GAS2L2_HUMAN  | GAS2-like protein 2 OS=Homo sapiens GN=GAS2L2 PE=2 SV=1                                            | 0.9672 | -2.058893689 |
| Q8TF72    | SHRM3_HUMAN   | Protein Shroom3 OS=Homo sapiens GN=SHROOM3 PE=1 SV=2                                               | 0.9976 | -2.120294234 |
| Q8TDW7-3  | FAT3_HUMAN    | Isoform 3 of Protocadherin Fat 3 OS=Homo sapiens GN=FAT3                                           | 0.9999 | -2.184424571 |
| O15083    | ERC2_HUMAN    | ERC protein 2 OS=Homo sapiens GN=ERC2 PE=1 SV=3                                                    | 0.9835 | -2.251538767 |
| Q15323    | K1H1_HUMAN    | Keratin                                                                                            | 1      | -2.251538767 |
| Q9NQW8-2  | CNGB3_HUMAN   | Isoform 2 of Cyclic nucleotide-gated cation channel beta-3 OS=Homo sapiens GN=CNGB3                | 0.9982 | -2.251538767 |
| D6R922    | D6R922_HUMAN  | WD repeat-containing protein 36 OS=Homo sapiens GN=WDR36 PE=4 SV=1                                 | 0.9921 | -2.251538767 |
| Q7Z2K8-2  | GRIN1_HUMAN   | Isoform 2 of G protein-regulated inducer of neurite outgrowth 1 OS=Homo sapiens GN=GPRIN1          | 1      | -2.64385619  |
| Q81YR2    | SMYD4_HUMAN   | SET and MYND domain-containing protein 4 OS=Homo sapiens GN=SMYD4 PE=2 SV=3                        | 0.9999 | -2.836501268 |
| A7E2U8    | CD047_HUMAN   | UPF0602 protein C4orf47 OS=Homo sapiens GN=C4orf47 PE=2 SV=1                                       | 0.9362 | -2.836501268 |
| P02768-2  | ALBU_HUMAN    | Isoform 2 of Serum albumin OS=Homo sapiens GN=ALB                                                  | 0.9989 | -3.058893689 |
| Q9UMN6    | MLL4_HUMAN    | Histone-lysine N-methyltransferase MLL4 OS=Homo sapiens GN=WBP7 PE=1 SV=1                          | 0.9938 | -3.058893689 |
| Q92623    | TTC9A_HUMAN   | Tetratricopeptide repeat protein 9A OS=Homo sapiens GN=TTC9 PE=2 SV=3                              | 0.9678 | -3.184424571 |
| E5RJ70    | E5RJ70_HUMAN  | Eukaryotic translation initiation factor 3 subunit H (Fragment) OS=Homo sapiens GN=EIF3H PE=4 SV=1 | 1      | -3.64385619  |
| Q10471    | GALT2_HUMAN   | Polypeptide N-acetylgalactosaminyltransferase 2 OS=Homo sapiens GN=GALNT2 PE=1 SV=1                | 0.9965 | -3.836501268 |
| Q9Y6Z5    | MLAS1_HUMAN   | Putative uncharacterized protein MLLT4-AS1 OS=Homo sapiens GN=MLLT4-AS1 PE=5 SV=1                  | 0.8992 | -3.836501268 |
| O15078    | CE290_HUMAN   | Centrosomal protein of 290 kDa OS=Homo sapiens GN=CEP290 PE=1 SV=2                                 | 0.9618 | -4.321928095 |
| Q865Q6-1  | GP123_HUMAN   | Isoform 1 of Probable G-protein coupled receptor 123 OS=Homo sapiens GN=GPR123                     | 0.9373 | -4.64385619  |
| P78385    | KRT83_HUMAN   | Keratin                                                                                            | 0.9999 | -5.64385619  |
| O75044    | SRGP2_HUMAN   | SLIT-ROBO Rho GTPase-activating protein 2 OS=Homo sapiens GN=SRGAP2 PE=1 SV=2                      | 0.9924 | -6.64385619  |
| Q0VG06-3  | FP100_HUMAN   | Isoform 3 of Fanconi anemia-associated protein of 100 kDa OS=Homo sapiens GN=FAAP100               | 0.9987 | 9.964340868  |
| Q03188    | CENPC_HUMAN   | Centromere protein C 1 OS=Homo sapiens GN=CENPC1 PE=1 SV=2                                         | 0.9897 | 5.015247774  |
| J3QRW8    | J3QRW8_HUMAN  | Uncharacterized protein (Fragment) OS=Homo sapiens PE=4 SV=1                                       | 0.9438 | 4.793895883  |
| Q7Z3U7-2  | MON2_HUMAN    | Isoform 2 of Protein MON2 homolog OS=Homo sapiens GN=MON2                                          | 0.9853 | 3.74343989   |
| P42771-3  | CD2A1_HUMAN   | Isoform 3 of Cyclin-dependent kinase inhibitor 2A                                                  | 0.9924 | 2.769771739  |
| Q12888-2  | TP53B_HUMAN   | Isoform 2 of Tumor suppressor p53-binding protein 1 OS=Homo sapiens GN=TP53BP1                     | 0.9981 | 2.488000771  |
| Q9C0G6    | DYH6_HUMAN    | Dynein heavy chain 6                                                                               | 0.9985 | 2.339137385  |
| Q8WWW8    | ARAP3_HUMAN   | Arf-GAP with Rho-GAP domain                                                                        | 0.8591 | 2.207892852  |
| Q5T5C0-2  | STXB5_HUMAN   | Isoform 2 of Syntaxin-binding protein 5 OS=Homo sapiens GN=STXB5                                   | 0.9901 | 2.189033824  |
| Q5SR65-2  | NU188_HUMAN   | Isoform 2 of Nucleoporin NUP188 homolog OS=Homo sapiens GN=NUP188                                  | 0.9875 | 1.827819025  |
| A5D8V7    | CC151_HUMAN   | Coiled-coil domain-containing protein 151 OS=Homo sapiens GN=CCDC151 PE=2 SV=1                     | 0.9972 | 1.744161096  |
| P04899-3  | GNAI2_HUMAN   | Isoform 3 of Guanine nucleotide-binding protein G(i) subunit alpha-2 OS=Homo sapiens GN=GNAI2      | 0.9938 | 1.432959407  |
| P13073    | COX41_HUMAN   | Cytochrome c oxidase subunit 4 isoform 1                                                           | 0.9446 | 1.344828497  |
| H0Y138    | H0Y138_HUMAN  | Uncharacterized protein OS=Homo sapiens PE=4 SV=1                                                  | 0.9787 | 1.15704371   |
| F6WGS5    | F6WGS5_HUMAN  | Steroid receptor RNA activator 1 OS=Homo sapiens GN=SRA1 PE=4 SV=1                                 | 0.9841 | 1.021479727  |
| Q8N201    | INT1_HUMAN    | Integrator complex subunit 1 OS=Homo sapiens GN=INTS1 PE=1 SV=2                                    | 0.9999 | 1.014355293  |
| F8WCL5    | F8WCL5_HUMAN  | Nebulin OS=Homo sapiens GN=NEB PE=4 SV=1                                                           | 0.9999 | 1.014355293  |
| P55263-2  | ADK_HUMAN     | Isoform Short of Adenosine kinase OS=Homo sapiens GN=ADK                                           | 0.9085 | 0.963474124  |
| F8W7C6    | F8W7C6_HUMAN  | 60S ribosomal protein L10 OS=Homo sapiens GN=RPL10 PE=4 SV=1                                       | 1      | 0.748461233  |
| Q12904-2  | AIMP1_HUMAN   | Isoform 2 of Aminoacyl tRNA synthase complex-interacting multifunctional protein 1 OS=Homo sapiens | 1      | 0.731183242  |
| Q99615-2  | DNJC7_HUMAN   | Isoform 2 of DnaJ homolog subfamily C member 7 OS=Homo sapiens GN=DNAJC7                           | 0.9364 | 0.731183242  |
| Q8TAA5    | GRPE2_HUMAN   | GrpE protein homolog 2                                                                             | 0.9999 | 0.695993813  |
| Q01813    | K6PP_HUMAN    | 6-phosphofructokinase type C OS=Homo sapiens GN=PFKP PE=1 SV=2                                     | 0.8455 | 0.622930351  |
| Q86W42-3  | THOC6_HUMAN   | Isoform 3 of THO complex subunit 6 homolog OS=Homo sapiens GN=THOC6                                | 1      | 0.59454855   |
| Q16740    | CLPP_HUMAN    | Putative ATP-dependent Clp protease proteolytic subunit                                            | 0.8778 | 0.545968369  |
| Q8TF39    | ZN483_HUMAN   | Zinc finger protein 483 OS=Homo sapiens GN=ZNF483 PE=1 SV=3                                        | 0.9575 | 0.454175893  |
| E7EMK4    | E7EMK4_HUMAN  | ATP-dependent RNA helicase DDX19B OS=Homo sapiens GN=DDX19B PE=4 SV=1                              | 0.9968 | 0.443606651  |
| Q8IZT6-2  | ASPM_HUMAN    | Isoform 2 of Abnormal spindle-like microcephaly-associated protein OS=Homo sapiens GN=ASPM         | 0.9915 | 0.443606651  |
| Q07837    | SLC31_HUMAN   | Neutral and basic amino acid transport protein rBAT OS=Homo sapiens GN=SLC3A1 PE=1 SV=2            | 0.9975 | 0.400557993  |
| Q9NPJ3    | ACO13_HUMAN   | Acyl-coenzyme A thioesterase 13 OS=Homo sapiens GN=ACOT13 PE=1 SV=1                                | 0.9997 | 0.367371066  |
| Q9NTI5-2  | PDS5B_HUMAN   | Isoform 2 of Sister chromatid cohesion protein PDS5 homolog B OS=Homo sapiens GN=PDS5B             | 1      | 0.35614381   |
| P14866-2  | HNRNPL_HUMAN  | Isoform 2 of Heterogeneous nuclear ribonucleoprotein L OS=Homo sapiens GN=HNRNPL                   | 1      | 0.333423734  |
| P63010-2  | AP2B1_HUMAN   | Isoform 2 of AP-2 complex subunit beta OS=Homo sapiens GN=AP2B1                                    | 1      | 0.333423734  |
| Q96P48-1  | ARAP1_HUMAN   | Isoform 1 of Arf-GAP with Rho-GAP domain                                                           | 0.9937 | 0.333423734  |
| P20340-2  | RAB6A_HUMAN   | Isoform 2 of Ras-related protein Rab-6A OS=Homo sapiens GN=RAB6A                                   | 0.9581 | 0.321928095  |
| P35244    | RFA3_HUMAN    | Replication protein A 14 kDa subunit OS=Homo sapiens GN=RPA3 PE=1 SV=1                             | 0.9999 | 0.310340121  |
| P61106    | RAB14_HUMAN   | Ras-related protein Rab-14 OS=Homo sapiens GN=RAB14 PE=1 SV=4                                      | 1      | 0.23878686   |
| Q9UBU9    | NXF1_HUMAN    | Nuclear RNA export factor 1 OS=Homo sapiens GN=NXF1 PE=1 SV=1                                      | 0.9999 | 0.23878686   |
| Q8IY11    | FAM71A_HUMAN  | Protein FAM71A OS=Homo sapiens GN=FAM71A PE=2 SV=2                                                 | 0.9707 | 0.23878686   |
| Q99720-2  | SGMR1_HUMAN   | Isoform 2 of Sigma non-opioid intracellular receptor 1 OS=Homo sapiens GN=SIGMAR1                  | 0.9952 | 0.22650853   |
| G3V248    | G3V248_HUMAN  | Interferon alpha-inducible protein 27-like protein 1 OS=Homo sapiens GN=IFI27L1 PE=4 SV=1          | 0.9325 | 0.22650853   |
| O95197-2  | RTN3_HUMAN    | Isoform 2 of Reticulon-3 OS=Homo sapiens GN=RTN3                                                   | 1      | 0.214124805  |
| F8W031    | F8W031_HUMAN  | Uncharacterized protein (Fragment) OS=Homo sapiens PE=4 SV=1                                       | 0.9863 | 0.214124805  |
| Q13885    | TUBB2A_HUMAN  | Tubulin beta-2A chain OS=Homo sapiens GN=TUBB2A PE=1 SV=1                                          | 0.9992 | 0.214124805  |
| Q8TEA8    | DTD1_HUMAN    | D-tyrosyl-tRNA(Tyr) deacylase 1 OS=Homo sapiens GN=DTD1 PE=1 SV=2                                  | 1      | 0.214124805  |
| C9J7Q0    | ANKRD63_HUMAN | Ankyrin repeat domain-containing protein 63 OS=Homo sapiens GN=ANKRD63 PE=4 SV=1                   | 0.9988 | 0.201633861  |
| Q49A88-5  | CCD14_HUMAN   | Isoform 5 of Coiled-coil domain-containing protein 14 OS=Homo sapiens GN=CCDC14                    | 0.998  | 0.201633861  |
| Q02809    | PLOD1_HUMAN   | Procollagen-lysine                                                                                 | 0.9962 | 0.176322773  |
| Q8TE49-2  | OTU7A_HUMAN   | Isoform 2 of OTU domain-containing protein 7A OS=Homo sapiens GN=OTUD7A                            | 0.9227 | 0.176322773  |
| P63173    | RL38_HUMAN    | 60S ribosomal protein L38 OS=Homo sapiens GN=RPL38 PE=1 SV=2                                       | 0.995  | 0.163498732  |
| O95777    | NAA38_HUMAN   | N-alpha-acetyltransferase 38                                                                       | 0.9997 | 0.163498732  |

|          |              |                                                                                                   |        |              |
|----------|--------------|---------------------------------------------------------------------------------------------------|--------|--------------|
| Q13416   | ORC2_HUMAN   | Origin recognition complex subunit 2 OS=Homo sapiens GN=ORC2 PE=1 SV=2                            | 0.9882 | 0.163498732  |
| Q08623-3 | HDHD1_HUMAN  | Isoform 3 of Pseudouridine-5'-monophosphatase OS=Homo sapiens GN=HDHD1                            | 1      | 0.150559677  |
| Q5HYC2   | K2026_HUMAN  | Uncharacterized protein KIAA2026 OS=Homo sapiens GN=KIAA2026 PE=2 SV=2                            | 0.9869 | 0.150559677  |
| P28838-2 | AMPL_HUMAN   | Isoform 2 of Cytosol aminopeptidase OS=Homo sapiens GN=LAP3                                       | 0.9996 | 0.150559677  |
| P35080   | PROF2_HUMAN  | Profilin-2 OS=Homo sapiens GN=PFN2 PE=1 SV=3                                                      | 1      | 0.137503524  |
| Q8TDM6-2 | DLG5_HUMAN   | Isoform 2 of Disks large homolog 5 OS=Homo sapiens GN=DLG5                                        | 0.9926 | 0.124328135  |
| O75832   | PSD10_HUMAN  | 26S proteasome non-ATPase regulatory subunit 10 OS=Homo sapiens GN=PSMD10 PE=1 SV=1               | 1      | 0.111031312  |
| P12235   | ADT1_HUMAN   | ADP/ATP translocase 1 OS=Homo sapiens GN=SLC25A4 PE=1 SV=4                                        | 0.989  | 0.111031312  |
| Q5V266   | JKIP3_HUMAN  | Janus kinase and microtubule-interacting protein 3 OS=Homo sapiens GN=JAKMIP3 PE=2 SV=2           | 0.9861 | 0.111031312  |
| Q7L0J3-2 | SV2A_HUMAN   | Isoform 2 of Synaptic vesicle glycoprotein 2A OS=Homo sapiens GN=SV2A                             | 0.962  | 0.111031312  |
| Q9N9R3   | NUA4L_HUMAN  | NADH dehydrogenase [ubiquinone] 1 alpha subcomplex subunit 4-like 2 OS=Homo sapiens GN=NDUFA      | 0.9606 | 0.111031312  |
| Q9BUF5   | TBB6_HUMAN   | Tubulin beta-6 chain OS=Homo sapiens GN=TUBB6 PE=1 SV=1                                           | 1      | 0.097610797  |
| Q9HC16-2 | K1586_HUMAN  | Isoform 2 of Uncharacterized protein KIAA1586 OS=Homo sapiens GN=KIAA1586                         | 0.9821 | 0.097610797  |
| Q9NSC7   | SIA7A_HUMAN  | Alpha-N-acetylgalactosaminide alpha-2                                                             | 0.9727 | 0.097610797  |
| P52333-2 | JAK3_HUMAN   | Isoform 1 of Tyrosine-protein kinase JAK3 OS=Homo sapiens GN=JAK3                                 | 0.8629 | 0.097610797  |
| P35249   | RFC4_HUMAN   | Replication factor C subunit 4 OS=Homo sapiens GN=RFC4 PE=1 SV=2                                  | 1      | 0.084064265  |
| Q6IBS0   | TWF2_HUMAN   | Twinfilin-2 OS=Homo sapiens GN=TWF2 PE=1 SV=2                                                     | 1      | 0.084064265  |
| Q8N3U4-2 | STAG2_HUMAN  | Isoform 2 of Cohesin subunit SA-2 OS=Homo sapiens GN=STAG2                                        | 0.9995 | 0.084064265  |
| P07237   | PDIA1_HUMAN  | Protein disulfide-isomerase OS=Homo sapiens GN=P4HB PE=1 SV=3                                     | 1      | 0.070389328  |
| Q8TEM1-2 | PO210_HUMAN  | Isoform 2 of Nuclear pore membrane glycoprotein 210 OS=Homo sapiens GN=NUP210                     | 0.9991 | 0.070389328  |
| P63172   | DYLT1_HUMAN  | Dynein light chain Tctex-type 1 OS=Homo sapiens GN=DYNLT1 PE=1 SV=1                               | 1      | 0.056583528  |
| Q15363   | TMED2_HUMAN  | Transmembrane emp24 domain-containing protein 2 OS=Homo sapiens GN=TMED2 PE=1 SV=1                | 1      | 0.056583528  |
| Q8NBJ5   | GT251_HUMAN  | Procollagen galactosyltransferase 1 OS=Homo sapiens GN=GLT25D1 PE=1 SV=1                          | 1      | 0.056583528  |
| P63241   | IF5A1_HUMAN  | Eukaryotic translation initiation factor 5A-1 OS=Homo sapiens GN=EIF5A PE=1 SV=2                  | 1      | 0.056583528  |
| Q9NVH0-2 | EXD2_HUMAN   | Isoform 2 of Exonuclease 3'-5' domain-containing protein 2 OS=Homo sapiens GN=EXD2                | 0.9983 | 0.056583528  |
| O43592   | XPOT_HUMAN   | Exportin-T OS=Homo sapiens GN=XPOT PE=1 SV=2                                                      | 0.9999 | 0.028569152  |
| Q5JTH9-2 | RRP12_HUMAN  | Isoform 2 of RRP12-like protein OS=Homo sapiens GN=RRP12                                          | 0.9999 | 0.028569152  |
| P14324   | FPPS_HUMAN   | Farnesyl pyrophosphate synthase OS=Homo sapiens GN=FDPS PE=1 SV=4                                 | 0.9987 | 0.014355293  |
| P17405-2 | ASM_HUMAN    | Isoform 2 of Sphingomyelin phosphodiesterase OS=Homo sapiens GN=SMPD1                             | 0.9584 | 0.014355293  |
| P28074-2 | PSB5_HUMAN   | Isoform 2 of Proteasome subunit beta type-5 OS=Homo sapiens GN=PSMB5                              | 1      | 0            |
| Q96HS1-2 | PGAM5_HUMAN  | Isoform 2 of Serine/threonine-protein phosphatase PGAM5                                           | 1      | 0            |
| Q6N069   | NAA16_HUMAN  | N-alpha-acetyltransferase 16                                                                      | 0.9998 | 0            |
| Q9NQ78   | K113B_HUMAN  | Kinesin-like protein KIF13B OS=Homo sapiens GN=KIF13B PE=1 SV=1                                   | 0.9547 | 0            |
| O00116   | ADAS_HUMAN   | Aldyldihydroxyacetonephosphate synthase                                                           | 0.9994 | -0.01449957  |
| Q6L93-2  | K116B_HUMAN  | Isoform 2 of Kinesin-like protein KIF16B OS=Homo sapiens GN=KIF16B                                | 0.9992 | -0.01449957  |
| O95372   | LYP2_HUMAN   | Acyl-protein thioesterase 2 OS=Homo sapiens GN=LYPLA2 PE=1 SV=1                                   | 0.9982 | -0.01449957  |
| Q6ZU69   | F205A_HUMAN  | Protein FAM205A OS=Homo sapiens GN=FAM205A PE=2 SV=4                                              | 0.9911 | -0.01449957  |
| Q15435-2 | PP1R7_HUMAN  | Isoform 2 of Protein phosphatase 1 regulatory subunit 7 OS=Homo sapiens GN=PPP1R7                 | 1      | -0.029146346 |
| P32322   | P5CR1_HUMAN  | Pyrrrole-5-carboxylate reductase 1                                                                | 1      | -0.029146346 |
| Q9Y4P8-2 | WIPI2_HUMAN  | Isoform 2 of WD repeat domain phosphoinositide-interacting protein 2 OS=Homo sapiens GN=WIPI2     | 0.9897 | -0.029146346 |
| P36551   | HEM6_HUMAN   | Coproporphyrinogen-III oxidase                                                                    | 0.8411 | -0.029146346 |
| Q9UL25   | RAB21_HUMAN  | Ras-related protein Rab-21 OS=Homo sapiens GN=RAB21 PE=1 SV=3                                     | 1      | -0.043943348 |
| P30042-2 | ES1_HUMAN    | Isoform Short of ES1 protein homolog                                                              | 1      | -0.043943348 |
| P52597   | HNRPF_HUMAN  | Heterogeneous nuclear ribonucleoprotein F OS=Homo sapiens GN=HNRNPF PE=1 SV=3                     | 0.9407 | -0.043943348 |
| Q9H9L3   | I20L2_HUMAN  | Interferon-stimulated 20 kDa exonuclease-like 2 OS=Homo sapiens GN=ISG20L2 PE=1 SV=1              | 0.9916 | -0.043943348 |
| Q75VX8-2 | FA59B_HUMAN  | Isoform 2 of Protein FAM59B OS=Homo sapiens GN=FAM59B                                             | 0.9386 | -0.058893689 |
| P18085   | ARF4_HUMAN   | ADP-ribosylation factor 4 OS=Homo sapiens GN=ARF4 PE=1 SV=3                                       | 1      | -0.058893689 |
| Q86X4-2  | FRAS1_HUMAN  | Isoform 2 of Extracellular matrix protein FRAS1 OS=Homo sapiens GN=FRAS1                          | 0.9906 | -0.058893689 |
| Q15418-2 | KS6A1_HUMAN  | Isoform 2 of Ribosomal protein S6 kinase alpha-1 OS=Homo sapiens GN=RPS6KA1                       | 0.9999 | -0.074000581 |
| P22307-2 | NLTP_HUMAN   | Isoform SCP2 of Non-specific lipid-transfer protein OS=Homo sapiens GN=SCP2                       | 0.998  | -0.074000581 |
| O60271-2 | JIP4_HUMAN   | Isoform 2 of C-Jun-amino-terminal kinase-interacting protein 4 OS=Homo sapiens GN=SPAG9           | 0.9534 | -0.074000581 |
| O14950   | ML12B_HUMAN  | Myosin regulatory light chain 12B OS=Homo sapiens GN=MYL12B PE=1 SV=2                             | 1      | -0.089267338 |
| P09651-2 | ROA1_HUMAN   | Isoform A1-A of Heterogeneous nuclear ribonucleoprotein A1 OS=Homo sapiens GN=HNRNPA1             | 1      | -0.089267338 |
| Q99832-3 | TCPH_HUMAN   | Isoform 3 of T-complex protein 1 subunit eta OS=Homo sapiens GN=CCT7                              | 1      | -0.089267338 |
| P55145   | MANF_HUMAN   | Mesencephalic astrocyte-derived neurotrophic factor OS=Homo sapiens GN=MANF PE=1 SV=3             | 0.9999 | -0.089267338 |
| Q27J81-2 | INF2_HUMAN   | Isoform 2 of Inverted formin-2 OS=Homo sapiens GN=INF2                                            | 0.9946 | -0.104697379 |
| F8VR82   | F8VR82_HUMAN | Serine/threonine-protein phosphatase OS=Homo sapiens GN=PPP1CC PE=3 SV=1                          | 0.9916 | -0.120294234 |
| P62195   | PRS8_HUMAN   | 26S protease regulatory subunit 8 OS=Homo sapiens GN=PSMCS5 PE=1 SV=1                             | 1      | -0.13606155  |
| P60709   | ACTB_HUMAN   | Actin                                                                                             | 1      | -0.13606155  |
| O43847-2 | NRDC_HUMAN   | Isoform 2 of Nardilysin OS=Homo sapiens GN=NRD1                                                   | 0.9975 | -0.13606155  |
| Q13404-1 | UB2V1_HUMAN  | Isoform 1 of Ubiquitin-conjugating enzyme E2 variant 1 OS=Homo sapiens GN=UBE2V1                  | 0.8011 | -0.13606155  |
| P53621-2 | COPA_HUMAN   | Isoform 2 of Coatomer subunit alpha OS=Homo sapiens GN=COPA                                       | 1      | -0.152003093 |
| Q92797   | SYMPK_HUMAN  | Symplekin OS=Homo sapiens GN=SYMPK PE=1 SV=2                                                      | 1      | -0.152003093 |
| A8MWP4   | YU008_HUMAN  | Putative uncharacterized protein ENSP0000401716 OS=Homo sapiens GN=PE=5 SV=1                      | 0.9944 | -0.152003093 |
| Q96CX2   | KCD12_HUMAN  | BTB/POZ domain-containing protein KCTD12 OS=Homo sapiens GN=KCTD12 PE=1 SV=1                      | 0.9937 | -0.152003093 |
| P26378-2 | ELAV4_HUMAN  | Isoform 2 of ELAV-like protein 4 OS=Homo sapiens GN=ELAVL4                                        | 0.9912 | -0.152003093 |
| Q9NZP6   | NPAP1_HUMAN  | Nuclear pore-associated protein 1 OS=Homo sapiens GN=NPAP1 PE=1 SV=2                              | 0.9713 | -0.152003093 |
| P07910-2 | HNRPC_HUMAN  | Isoform C1 of Heterogeneous nuclear ribonucleoproteins C1/C2 OS=Homo sapiens GN=HNRNPC            | 1      | -0.168122759 |
| O60506-2 | HNRPQ_HUMAN  | Isoform 2 of Heterogeneous nuclear ribonucleoprotein Q OS=Homo sapiens GN=SYNCRIP                 | 0.9999 | -0.168122759 |
| P09972   | ALDOC_HUMAN  | Fructose-bisphosphate aldolase C OS=Homo sapiens GN=ALDOC PE=1 SV=2                               | 1      | -0.168122759 |
| Q9HCM9   | TR139_HUMAN  | E3 ubiquitin-protein ligase TRIM39 OS=Homo sapiens GN=TRIM39 PE=1 SV=2                            | 0.9973 | -0.168122759 |
| Q9P2R3-2 | ANKFY1_HUMAN | Isoform 2 of Ankyrin repeat and FYVE domain-containing protein 1 OS=Homo sapiens GN=ANKFY1        | 0.9878 | -0.168122759 |
| Q09666   | AHNAK_HUMAN  | Neuroblast differentiation-associated protein AHNAK OS=Homo sapiens GN=AHNAK PE=1 SV=2            | 0.9553 | -0.168122759 |
| O43617   | TPPC3_HUMAN  | Trafficking protein particle complex subunit 3 OS=Homo sapiens GN=TRAPPC3 PE=1 SV=1               | 1      | -0.184424571 |
| P61086   | UBE2K_HUMAN  | Ubiquitin-conjugating enzyme E2 K OS=Homo sapiens GN=UBE2K PE=1 SV=3                              | 1      | -0.184424571 |
| Q96EY4   | TMA16_HUMAN  | Translation machinery-associated protein 16 OS=Homo sapiens GN=TMA16 PE=1 SV=2                    | 0.9992 | -0.184424571 |
| Q8NC54   | ZMYNB_HUMAN  | Uncharacterized protein ZMYNB OS=Homo sapiens GN=ZMYNB PE=2 SV=1                                  | 0.9758 | -0.184424571 |
| P98175-2 | RBM10_HUMAN  | Isoform 2 of RNA-binding protein 10 OS=Homo sapiens GN=RBM10                                      | 0.9012 | -0.184424571 |
| P61160   | ARP2_HUMAN   | Actin-related protein 2 OS=Homo sapiens GN=ACTR2 PE=1 SV=1                                        | 0.998  | -0.200912694 |
| Q9BTT0   | AN32E_HUMAN  | Acidic leucine-rich nuclear phosphoprotein 32 family member E OS=Homo sapiens GN=ANP32E PE=1 SV=1 | 1      | -0.200912694 |
| Q9H0U4   | RAB1B_HUMAN  | Ras-related protein Rab-1B OS=Homo sapiens GN=RAB1B PE=1 SV=1                                     | 1      | -0.200912694 |
| O14744-2 | ANM5_HUMAN   | Isoform 2 of Protein arginine N-methyltransferase 5 OS=Homo sapiens GN=PRMT5                      | 0.9996 | -0.200912694 |
| Q96AT9-2 | RPE_HUMAN    | Isoform 2 of Ribulose-phosphate 3-epimerase OS=Homo sapiens GN=RPE                                | 1      | -0.217591435 |
| P0CG30   | GSTT2_HUMAN  | Glutathione S-transferase theta-2B OS=Homo sapiens GN=GSTT2B PE=1 SV=1                            | 1      | -0.217591435 |
| Q7L9L4   | MOB1B_HUMAN  | MOB kinase activator 1B OS=Homo sapiens GN=MOB1B PE=1 SV=3                                        | 1      | -0.217591435 |
| Q9Y265-2 | RUVB1_HUMAN  | Isoform 2 of RuvB-like 1 OS=Homo sapiens GN=RUVB1                                                 | 1      | -0.217591435 |
| O75694   | NU155_HUMAN  | Nuclear pore complex protein Nup155 OS=Homo sapiens GN=NUP155 PE=1 SV=1                           | 1      | -0.234465254 |
| O75400-3 | PR40A_HUMAN  | Isoform 3 of Pre-mRNA-processing factor 40 homolog A OS=Homo sapiens GN=PRPF40A                   | 0.9998 | -0.234465254 |
| Q9UHY7   | ENOPH_HUMAN  | Enolase-phosphatase E1 OS=Homo sapiens GN=ENOPH1 PE=1 SV=1                                        | 0.9867 | -0.234465254 |
| A8MTJ3   | GNAT3_HUMAN  | Guanine nucleotide-binding protein G(t) subunit alpha-3 OS=Homo sapiens GN=GNAT3 PE=2 SV=2        | 1      | -0.251538767 |
| P04179   | SODM_HUMAN   | Superoxide dismutase [Mn]                                                                         | 1      | -0.251538767 |
| P50395   | GDIB_HUMAN   | Rab GDP dissociation inhibitor beta OS=Homo sapiens GN=GD12 PE=1 SV=2                             | 1      | -0.251538767 |

|          |              |                                                                                                    |        |              |
|----------|--------------|----------------------------------------------------------------------------------------------------|--------|--------------|
| H0Y9N1   | H0Y9N1_HUMAN | Programmed cell death protein 6 (Fragment) OS=Homo sapiens GN=PDCD6 PE=4 SV=1                      | 0.9986 | -0.251538767 |
| Q99653   | CHP1_HUMAN   | Calcineurin B homologous protein 1 OS=Homo sapiens GN=CHP1 PE=1 SV=3                               | 0.8949 | -0.251538767 |
| P35658-2 | NU214_HUMAN  | Isoform 2 of Nuclear pore complex protein Nup214 OS=Homo sapiens GN=NUP214                         | 0.8924 | -0.251538767 |
| Q02952-2 | AKA12_HUMAN  | Isoform 2 of A-kinase anchor protein 12 OS=Homo sapiens GN=AKAP12                                  | 1      | -0.268816758 |
| P49321-2 | NASP_HUMAN   | Isoform 2 of Nuclear autoantigenic sperm protein OS=Homo sapiens GN=NASP                           | 1      | -0.268816758 |
| Q15907   | RB11B_HUMAN  | Ras-related protein Rab-11B OS=Homo sapiens GN=RB11B PE=1 SV=4                                     | 1      | -0.268816758 |
| Q13618-2 | CUL3_HUMAN   | Isoform 2 of Cullin-3 OS=Homo sapiens GN=CUL3                                                      | 0.9997 | -0.268816758 |
| Q9Y512   | SAM50_HUMAN  | Sorting and assembly machinery component 50 homolog OS=Homo sapiens GN=SAMM50 PE=1 SV=3            | 0.9995 | -0.268816758 |
| Q9Y3D8   | KAD6_HUMAN   | Adenylate kinase isoenzyme 6 OS=Homo sapiens GN=TAF9 PE=1 SV=1                                     | 0.9337 | -0.268816758 |
| Q961C7   | RMD3_HUMAN   | Regulator of microtubule dynamics protein 3 OS=Homo sapiens GN=FAM82A2 PE=1 SV=2                   | 1      | -0.286304185 |
| Q9BYD2   | RM09_HUMAN   | 39S ribosomal protein L9                                                                           | 0.9984 | -0.286304185 |
| P49753   | ACOT2_HUMAN  | Acyl-coenzyme A thioesterase 2                                                                     | 0.8754 | -0.286304185 |
| Q9Y263   | PLAP_HUMAN   | Phospholipase A-2-activating protein OS=Homo sapiens GN=PLAA PE=1 SV=2                             | 0.9834 | -0.304006187 |
| Q9H3P2   | NELFA_HUMAN  | Negative elongation factor A OS=Homo sapiens GN=WHSC2 PE=1 SV=3                                    | 0.9304 | -0.304006187 |
| O76094   | SRP72_HUMAN  | Signal recognition particle 72 kDa protein OS=Homo sapiens GN=SRP72 PE=1 SV=3                      | 1      | -0.321928095 |
| P12109   | CO6A1_HUMAN  | Collagen alpha-1(VI) chain OS=Homo sapiens GN=COL6A1 PE=1 SV=3                                     | 0.9979 | -0.321928095 |
| Q13405   | RM49_HUMAN   | 39S ribosomal protein L49                                                                          | 0.9446 | -0.321928095 |
| P50213-2 | IDH3A_HUMAN  | Isoform 2 of Isocitrate dehydrogenase [NAD] subunit alpha                                          | 1      | -0.340075442 |
| Q76L83   | ASXL2_HUMAN  | Putative Polycomb group protein ASXL2 OS=Homo sapiens GN=ASXL2 PE=1 SV=1                           | 0.9991 | -0.340075442 |
| O60721-2 | NCKX1_HUMAN  | Isoform 2 of Sodium/potassium/calcium exchanger 1 OS=Homo sapiens GN=SLC24A1                       | 0.9609 | -0.340075442 |
| O00264   | PGR1_HUMAN   | Membrane-associated progesterone receptor component 1 OS=Homo sapiens GN=PGRMC1 PE=1 SV=3          | 1      | -0.358453971 |
| P55060   | XPO2_HUMAN   | Exportin-2 OS=Homo sapiens GN=CSE1L PE=1 SV=3                                                      | 1      | -0.358453971 |
| Q14324   | MYPC2_HUMAN  | Myosin-binding protein C                                                                           | 0.9222 | -0.358453971 |
| Q9BV86-2 | NTM1A_HUMAN  | Isoform 2 of N-terminal Xaa-Pro-Lys N-methyltransferase 1 OS=Homo sapiens GN=NTMT1                 | 1      | -0.377069649 |
| P42677   | RS27_HUMAN   | 40S ribosomal protein S27 OS=Homo sapiens GN=RP527 PE=1 SV=3                                       | 1      | -0.377069649 |
| Q8WUW0   | NU133_HUMAN  | Nuclear pore complex protein Nup133 OS=Homo sapiens GN=NUP133 PE=1 SV=2                            | 0.9998 | -0.377069649 |
| Q9NR45   | SIAS_HUMAN   | Sialic acid synthase OS=Homo sapiens GN=NANS PE=1 SV=2                                             | 0.9446 | -0.377069649 |
| O15160-2 | RPAC1_HUMAN  | Isoform 2 of DNA-directed RNA polymerases I and III subunit RPAC1 OS=Homo sapiens GN=POLR1C        | 0.8568 | -0.377069649 |
| Q15102   | PA1B3_HUMAN  | Platelet-activating factor acetylhydrolase IB subunit gamma OS=Homo sapiens GN=PFAFH1B3 PE=1 SV=   | 1      | -0.395928676 |
| Q9NZA1   | CLIC5_HUMAN  | Chloride intracellular channel protein 5 OS=Homo sapiens GN=CLIC5 PE=1 SV=3                        | 0.9983 | -0.395928676 |
| P30049   | ATPD_HUMAN   | ATP synthase subunit delta                                                                         | 0.9999 | -0.395928676 |
| Q13765   | NACA_HUMAN   | Nascent polypeptide-associated complex subunit alpha OS=Homo sapiens GN=NACA PE=1 SV=1             | 1      | -0.415037499 |
| J3QLC8   | J3QLC8_HUMAN | 60S ribosomal protein L17 OS=Homo sapiens GN=RPL17 PE=3 SV=1                                       | 1      | -0.415037499 |
| P60059   | SC61G_HUMAN  | Protein transport protein Sec61 subunit gamma OS=Homo sapiens GN=SEC61G PE=2 SV=1                  | 0.9446 | -0.415037499 |
| P08237-2 | K6PF_HUMAN   | Isoform 2 of 6-phosphofructokinase                                                                 | 1      | -0.434402824 |
| Q8TDD1-2 | DDX54_HUMAN  | Isoform 2 of ATP-dependent RNA helicase DDX54 OS=Homo sapiens GN=DDX54                             | 0.9998 | -0.434402824 |
| Q16643-2 | DREB_HUMAN   | Isoform 2 of Drebrin OS=Homo sapiens GN=DNB1                                                       | 0.9999 | -0.454031631 |
| P43304-2 | GPDM_HUMAN   | Isoform 2 of Glycerol-3-phosphate dehydrogenase                                                    | 0.9984 | -0.473931188 |
| O43708-2 | MAAL1_HUMAN  | Isoform 2 of Maleylacetoacetate isomerase OS=Homo sapiens GN=GSTZ1                                 | 0.8731 | -0.473931188 |
| Q6DN03   | H2B2C_HUMAN  | Putative histone H2B type 2-C OS=Homo sapiens GN=HIST2H2BC PE=5 SV=3                               | 1      | -0.49410907  |
| P52565   | GDIR1_HUMAN  | Rho GDP-dissociation inhibitor 1 OS=Homo sapiens GN=ARHGDI1A PE=1 SV=3                             | 1      | -0.49410907  |
| Q8WTV0-2 | SCR1B_HUMAN  | Isoform 1 of Scavenger receptor class B member 1 OS=Homo sapiens GN=SCR1B                          | 0.9836 | -0.49410907  |
| O43660-2 | PLRG1_HUMAN  | Isoform 2 of Pleiotropic regulator 1 OS=Homo sapiens GN=PLRG1                                      | 0.9405 | -0.49410907  |
| P05023-2 | AT1A1_HUMAN  | Isoform 2 of Sodium/potassium-transporting ATPase subunit alpha-1 OS=Homo sapiens GN=ATP1A1        | 0.992  | -0.514573173 |
| P11717   | MPRI1_HUMAN  | Cation-independent mannose-6-phosphate receptor OS=Homo sapiens GN=IGF2R PE=1 SV=3                 | 0.9904 | -0.514573173 |
| P21281   | VATB2_HUMAN  | V-type proton ATPase subunit B                                                                     | 0.8971 | -0.535331733 |
| P67870   | CSK2B_HUMAN  | Casein kinase II subunit beta OS=Homo sapiens GN=CSNK2B PE=1 SV=1                                  | 1      | -0.556393349 |
| P62333   | PRS10_HUMAN  | 26S protease regulatory subunit 10B OS=Homo sapiens GN=PSMC6 PE=1 SV=1                             | 0.9999 | -0.556393349 |
| Q9NPL8   | TIDC1_HUMAN  | Translocase of inner mitochondrial membrane domain-containing protein 1 OS=Homo sapiens GN=TIMM    | 1      | -0.577766999 |
| Q13868   | EXOS2_HUMAN  | Exosome complex component RRP4 OS=Homo sapiens GN=EXOSC2 PE=1 SV=2                                 | 0.9419 | -0.577766999 |
| Q96A35   | RM24_HUMAN   | 39S ribosomal protein L24                                                                          | 0.9152 | -0.577766999 |
| Q15370   | ELOB_HUMAN   | Transcription elongation factor B polypeptide 2 OS=Homo sapiens GN=TCEB2 PE=1 SV=1                 | 0.9974 | -0.59946207  |
| Q96QC0   | PP1RA_HUMAN  | Serine/threonine-protein phosphatase 1 regulatory subunit 10 OS=Homo sapiens GN=PPP1R10 PE=1 SV    | 0.9849 | -0.621488377 |
| Q5T9A4-3 | ATD3B_HUMAN  | Isoform 3 of ATPase family AAA domain-containing protein 3B OS=Homo sapiens GN=ATAD3B              | 0.9933 | -0.76121314  |
| Q15061   | WDR43_HUMAN  | WD repeat-containing protein 43 OS=Homo sapiens GN=WDR43 PE=1 SV=3                                 | 1      | -0.785875195 |
| O75376-2 | NCOR1_HUMAN  | Isoform 2 of Nuclear receptor corepressor 1 OS=Homo sapiens GN=NCOR1                               | 0.9813 | -0.810966176 |
| Q92665   | RT31_HUMAN   | 28S ribosomal protein S31                                                                          | 1      | -0.862496476 |
| O75964   | ATP5L_HUMAN  | ATP synthase subunit g                                                                             | 1      | -0.915935735 |
| Q00325-2 | MPCP_HUMAN   | Isoform B of Phosphate carrier protein                                                             | 0.9999 | -0.915935735 |
| Q86UP3-2 | ZFH4_HUMAN   | Isoform 2 of Zinc finger homeobox protein 4 OS=Homo sapiens GN=ZFH4                                | 0.9999 | -0.915935735 |
| Q8IV32   | CCD71_HUMAN  | Coiled-coil domain-containing protein 71 OS=Homo sapiens GN=CCDC71 PE=2 SV=3                       | 0.9958 | -0.943416472 |
| P82914   | RT15_HUMAN   | 28S ribosomal protein S15                                                                          | 0.8345 | -0.943416472 |
| Q9H8H3   | MET7A_HUMAN  | Methyltransferase-like protein 7A OS=Homo sapiens GN=METTL7A PE=1 SV=1                             | 0.9502 | -1           |
| P51398-2 | RT29_HUMAN   | Isoform 2 of 28S ribosomal protein S29                                                             | 0.9998 | -1.029146346 |
| Q9Y3D9   | RT23_HUMAN   | 28S ribosomal protein S23                                                                          | 0.9997 | -1.029146346 |
| Q9UPX0   | TUTLB_HUMAN  | Protein turtle homolog B OS=Homo sapiens GN=IGSF9B PE=2 SV=2                                       | 0.9601 | -1.029146346 |
| P60866-2 | RS20_HUMAN   | Isoform 2 of 40S ribosomal protein S20 OS=Homo sapiens GN=RPS20                                    | 0.9997 | -1.058893689 |
| P19404   | NDUV2_HUMAN  | NADH dehydrogenase [ubiquinone] flavoprotein 2                                                     | 0.9985 | -1.120294234 |
| Q9P0J0   | NDUAD_HUMAN  | NADH dehydrogenase [ubiquinone] 1 alpha subcomplex subunit 13 OS=Homo sapiens GN=NDUFA13 PE=1 SV=1 | 0.8924 | -1.217591435 |
| P21675-2 | TAF1_HUMAN   | Isoform 2 of Transcription initiation factor TFIID subunit 1 OS=Homo sapiens GN=TAF1               | 0.957  | -1.358453971 |
| Q9NQ50   | RM40_HUMAN   | 39S ribosomal protein L40                                                                          | 0.8433 | -1.434402824 |
| Q9NX20   | RM16_HUMAN   | 39S ribosomal protein L16                                                                          | 0.91   | -1.473931188 |
| Q9Y570-2 | PPME1_HUMAN  | Isoform 2 of Protein phosphatase methylesterase 1 OS=Homo sapiens GN=PPME1                         | 1      | -1.59946207  |
| E5RH44   | E5RH44_HUMAN | RB1-inducible coiled-coil protein 1 (Fragment) OS=Homo sapiens GN=RB1CC1 PE=4 SV=1                 | 0.8737 | -1.689659879 |
| Q9P0L0-2 | VAPA_HUMAN   | Isoform 2 of Vesicle-associated membrane protein-associated protein A OS=Homo sapiens GN=VAPA      | 0.9921 | -1.736965594 |
| Q9HD33-2 | RM47_HUMAN   | Isoform 2 of 39S ribosomal protein L47                                                             | 0.8345 | -1.736965594 |
| Q96JN8-2 | NEUL4_HUMAN  | Isoform 2 of Neuralized-like protein 4 OS=Homo sapiens GN=NEURL4                                   | 0.9995 | -2.058893689 |
| P0C671   | CF222_HUMAN  | Uncharacterized protein C6orf222 OS=Homo sapiens GN=C6orf222 PE=2 SV=1                             | 0.871  | -2.058893689 |
| Q9Y237-2 | PIN4_HUMAN   | Isoform 2 of Peptidyl-prolyl cis-trans isomerase NIMA-interacting 4 OS=Homo sapiens GN=PIN4        | 1      | -2.184424571 |
| Q9BYD1   | RM13_HUMAN   | 39S ribosomal protein L13                                                                          | 0.9894 | -2.251538767 |
| P56715   | RP1_HUMAN    | Oxygen-regulated protein 1 OS=Homo sapiens GN=RP1 PE=1 SV=1                                        | 0.9721 | -2.251538767 |
| Q92626   | PXDN_HUMAN   | Peroxidasin homolog OS=Homo sapiens GN=PXDN PE=1 SV=2                                              | 0.9303 | -2.321928095 |
| I3L4Z2   | I3L4Z2_HUMAN | Uncharacterized protein OS=Homo sapiens GN=PE=4 SV=1                                               | 0.9495 | -2.556393349 |
| E9PEI6   | E9PEI6_HUMAN | Diffuse panbronchiolitis critical region protein 1 OS=Homo sapiens GN=DPCR1 PE=4 SV=1              | 0.9309 | -2.556393349 |
| P02647   | APOA1_HUMAN  | Apolipoprotein A-I OS=Homo sapiens GN=APOA1 PE=1 SV=1                                              | 0.9364 | -2.64385619  |
| Q7Z589   | EMSY_HUMAN   | Protein EMSY OS=Homo sapiens GN=EMSY PE=1 SV=2                                                     | 0.9635 | -4.321928095 |
| Q5T5P2-7 | SKT_HUMAN    | Isoform 5 of Sickle tail protein homolog OS=Homo sapiens GN=KIAA1217                               | 0.9856 | -5.058893689 |
| Q5CZC0-2 | FSIP2_HUMAN  | Isoform 2 of Fibrous sheath-interacting protein 2 OS=Homo sapiens GN=FSIP2                         | 0.9908 | -6.64385619  |
