# Supplementary figures and images for: Quantitative proteomic analysis reveals mitochondrial protein changes in MPP+-induced neuronal cells
Source: Royal Society of Chemistry journal article supplement (doi:10.1039/c4mb00026a), 2014-04-24

# Supporting Information Figure S1

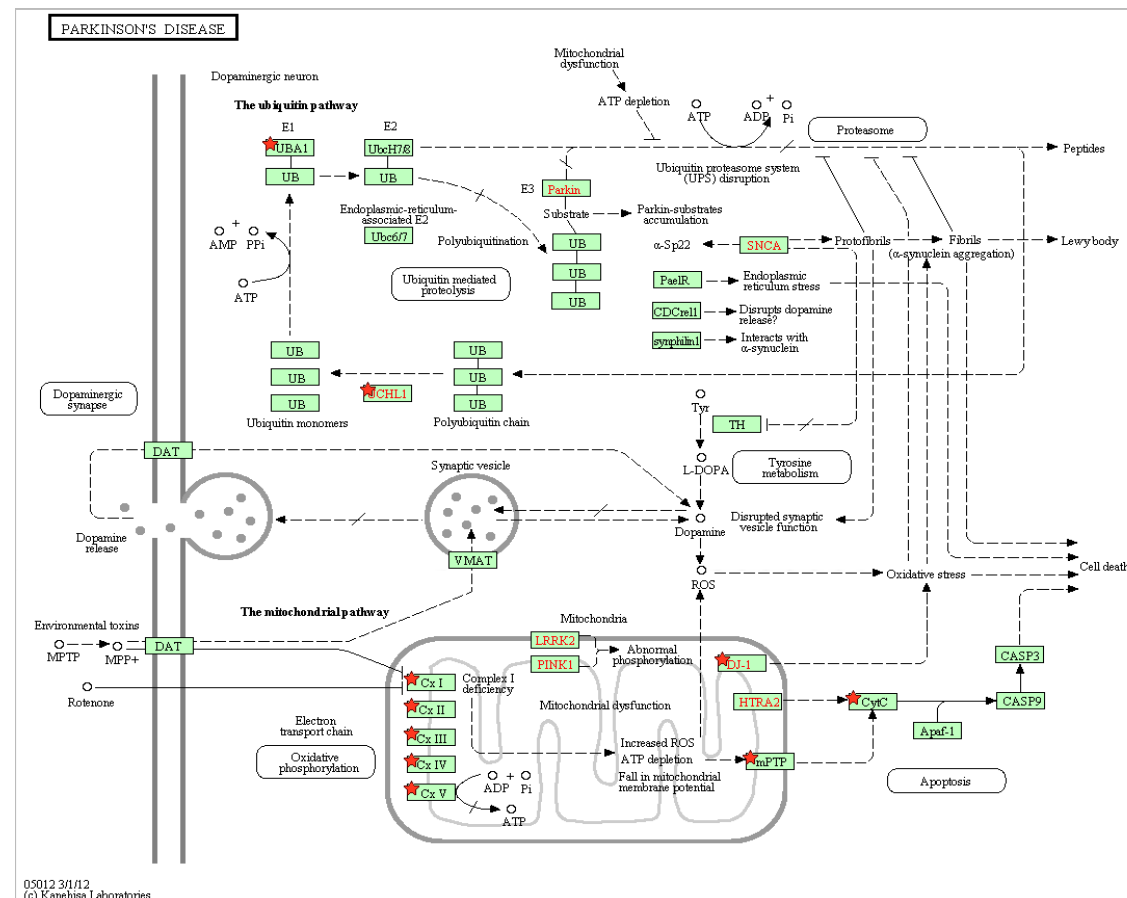

Supplement: c4mb00026a2.pdf [file c4mb00026a2.pdf]
